# Supplementary material
Source: PubMed Central journal article supplement (PMC2974774)
Supplement: NIHMS235911-supplement-1_si_001.pdf [file NIHMS235911-supplement-1_si_001.pdf]

**Supporting Information for**  
**“Quantitative Proteomic Analysis Reveals the Perturbation**  
**of Multiple Cellular Pathways in Jurkat-T Cells Induced by**  
**Doxorubicin Treatment”**

**by**

Xiaoli Dong, Lei Xiong, Xinning Jiang and Yinsheng Wang

**Table of Contents**

---

|                 |                                                                                                         |
|-----------------|---------------------------------------------------------------------------------------------------------|
| <b>Table S1</b> | The detailed results for all proteins quantified in this study                                          |
| <b>Table S2</b> | The detailed quantification results for proteins with substantial changes.                              |
| <b>Table S3</b> | Quantification results for elongation factors and ribosomal proteins.                                   |
| <b>Table S4</b> | Pathway analysis results obtained by Ingenuity Pathway Analysis using the quantitative proteomics data. |

---

**Table S1. Detailed results for all proteins quantified in this study (“S.D.” designates standard deviations for the measurement results)**

| <b>IPI Number</b> | <b>Protein Name</b>                                                                     | <b>Peptide number</b> | <b>Forward Set 1</b> | <b>Forward Set 2</b> | <b>Reverse Set 3</b> | <b>Average Ratio (Treated /Untreated)</b> | <b>S.D.</b> |
|-------------------|-----------------------------------------------------------------------------------------|-----------------------|----------------------|----------------------|----------------------|-------------------------------------------|-------------|
| IPI00008475.1     | Hydroxymethylglutaryl-CoA synthase, cytoplasmic                                         | 3                     | 0.404                | 0.410                | 0.662                | 0.492                                     | 0.147       |
| IPI00007423.1     | Acidic leucine-rich nuclear phosphoprotein 32 family member B                           | 6                     | 0.552                | 0.505                | 0.472                | 0.510                                     | 0.041       |
| IPI00103732.1     | Thymidylate synthase                                                                    | 5                     | 0.490                | 0.498                | 0.574                | 0.521                                     | 0.046       |
| IPI00419258.3     | High mobility group protein B1                                                          | 1                     | 0.483                | 0.517                | 0.565                | 0.522                                     | 0.041       |
| IPI00218371.3     | Ribose-phosphate pyrophosphokinase III                                                  | 2                     | 0.578                | 0.381                | 0.662                | 0.540                                     | 0.144       |
| IPI00023048.3     | Elongation factor 1-delta                                                               | 4                     | 0.474                | 0.463                | 0.697                | 0.545                                     | 0.132       |
| IPI00003527.4     | Ezrin-radixin-moesin-binding phosphoprotein 50                                          | 3                     | 0.498                | 0.624                | 0.535                | 0.552                                     | 0.065       |
| IPI00005154.1     | Structure-specific recognition protein 1                                                | 5                     | 0.518                | 0.588                | 0.578                | 0.561                                     | 0.038       |
| IPI00101405.1     | Farnesyl diphosphate synthase                                                           | 4                     | 0.585                | 0.606                |                      | 0.595                                     | 0.015       |
| IPI00002214.1     | Importin alpha-2 subunit                                                                | 2                     | 0.599                | 0.735                | 0.461                | 0.598                                     | 0.137       |
| IPI00411356.5     | Vacuolar sorting protein 4a                                                             | 1                     | 0.621                | 0.606                | 0.575                | 0.601                                     | 0.024       |
| IPI00004656.1     | Beta-2-microglobulin precursor                                                          | 2                     | 0.629                | 0.593                | 0.637                | 0.619                                     | 0.024       |
| IPI00025874.2     | Dolichyl-diphosphooligosaccharide--protein glycosyltransferase 67 kDa subunit precursor | 2                     | 0.508                |                      | 0.752                | 0.630                                     | 0.173       |
| IPI00216587.8     | 40S ribosomal protein S8                                                                | 3                     | 0.588                | 0.680                | 0.641                | 0.637                                     | 0.046       |
| IPI00155168.2     | Protein tyrosine phosphatase, receptor type C                                           | 2                     | 0.532                | 0.685                | 0.694                | 0.637                                     | 0.091       |
| IPI00033494.3     | Myosin regulatory light chain                                                           | 2                     | 0.595                | 0.635                | 0.693                | 0.641                                     | 0.049       |

| <b>IPI Number</b> | <b>Protein Name</b>                                          | <b>Peptide number</b> | <b>Forward Set 1</b> | <b>Forward Set 2</b> | <b>Reverse Set 3</b> | <b>Average Ratio (Treated /Untreated)</b> | <b>S.D.</b> |
|-------------------|--------------------------------------------------------------|-----------------------|----------------------|----------------------|----------------------|-------------------------------------------|-------------|
| IPI00027493.1     | 4F2 cell-surface antigen heavy chain                         | 5                     | 0.662                | 0.654                | 0.641                | 0.652                                     | 0.011       |
| IPI00006932.1     | LUC7-like 2                                                  | 3                     | 0.654                | 0.535                | 0.775                | 0.655                                     | 0.120       |
| IPI00010133.1     | Coronin-1A                                                   | 4                     | 0.608                | 0.696                | 0.664                | 0.656                                     | 0.044       |
| IPI00020454.1     | Deoxycytidine kinase                                         | 2                     |                      | 0.704                | 0.624                | 0.664                                     | 0.057       |
| IPI00301263.2     | CAD protein                                                  | 2                     | 0.629                |                      | 0.704                | 0.667                                     | 0.053       |
| IPI00029997.1     | 6-phosphogluconolactonase                                    | 7                     | 0.510                | 0.762                | 0.730                | 0.667                                     | 0.137       |
| IPI00027382.1     | Splice Isoform 2 of Serine/threonine-protein kinase PAK 3    | 3                     | 0.680                | 0.651                | 0.673                | 0.668                                     | 0.015       |
| IPI00024364.2     | Transportin-1                                                | 2                     | 0.820                | 0.520                |                      | 0.670                                     | 0.212       |
| IPI00305978.4     | Aflatoxin B1 aldehyde reductase member 2                     | 2                     | 0.578                | 0.685                | 0.752                | 0.672                                     | 0.088       |
| IPI00014808.1     | Platelet-activating factor acetylhydrolase IB gamma subunit  | 6                     | 0.699                | 0.662                | 0.654                | 0.672                                     | 0.024       |
| IPI00027341.1     | Macrophage capping protein                                   | 7                     | 0.587                | 0.781                | 0.654                | 0.674                                     | 0.099       |
| IPI00304409.3     | Calcium-regulated heat stable protein 1                      | 2                     | 0.621                | 0.754                | 0.704                | 0.693                                     | 0.067       |
| IPI00339379.3     | Splice Isoform 2 of Rho guanine nucleotide exchange factor 1 | 2                     | 0.662                | 0.735                | 0.692                | 0.696                                     | 0.037       |
| IPI00033025.8     | Septin-7                                                     | 2                     | 0.725                |                      | 0.676                | 0.700                                     | 0.035       |
| IPI00155723.3     | DEAH (Asp-Glu-Ala-His) box polypeptide 9 isoform 2           | 3                     |                      |                      | 0.703                | 0.703                                     |             |
| IPI00221088.4     | 40S ribosomal protein S9                                     | 3                     | 0.714                |                      |                      | 0.714                                     |             |
| IPI00027484.1     | T-cell surface antigen CD2 precursor                         | 2                     | 0.662                | 0.734                | 0.754                | 0.717                                     | 0.048       |
| IPI00644127.1     | Isoleucyl-tRNA synthetase, cytoplasmic                       | 2                     | 0.719                |                      |                      | 0.719                                     |             |
| IPI00654777.2     | Eukaryotic translation initiation factor 3 subunit 5         | 3                     | 0.708                | 0.630                | 0.821                | 0.720                                     | 0.096       |

| <b>IPI Number</b> | <b>Protein Name</b>                                                   | <b>Peptide number</b> | <b>Forward Set 1</b> | <b>Forward Set 2</b> | <b>Reverse Set 3</b> | <b>Average Ratio (Treated /Untreated)</b> | <b>S.D.</b> |
|-------------------|-----------------------------------------------------------------------|-----------------------|----------------------|----------------------|----------------------|-------------------------------------------|-------------|
| IPI00248359.6     | PREDICTED: similar to actin-like protein isoform 1                    | 4                     | 0.797                | 0.620                | 0.744                | 0.720                                     | 0.091       |
| IPI00748715.1     | septin 9                                                              | 2                     | 0.926                |                      | 0.524                | 0.725                                     | 0.285       |
| IPI00001352.1     | 21 kDa protein                                                        | 2                     | 0.730                |                      |                      | 0.730                                     |             |
| IPI00011891.6     | protein kinase, AMP-activated, alpha 1 catalytic subunit isoform 1    | 1                     | 0.730                |                      |                      | 0.730                                     |             |
| IPI00018813.4     | Splice Isoform 2 of COP9 signalosome complex subunit 2                | 2                     | 0.735                |                      |                      | 0.735                                     |             |
| IPI00014256.2     | Splice Isoform 1 of Rho guanine nucleotide exchange factor 6          | 2                     | 0.621                | 0.787                | 0.798                | 0.735                                     | 0.099       |
| IPI00019450.2     | Splice Isoform Long of 60-kDa SS-A/Ro ribonucleoprotein               | 4                     | 0.649                | 0.796                | 0.761                | 0.735                                     | 0.077       |
| IPI00298347.1     | Splice Isoform 2 of Tyrosine-protein phosphatase non-receptor type 11 | 3                     | 0.629                | 0.749                | 0.832                | 0.737                                     | 0.102       |
| IPI00182728.2     | Vacuolar sorting protein 4b                                           | 2                     | 0.758                | 0.722                | 0.732                | 0.737                                     | 0.018       |
| IPI00017025.3     | PREDICTED: similar to peptidylprolyl isomerase A isoform 1            | 4                     | 0.752                | 0.712                | 0.748                | 0.737                                     | 0.022       |
| IPI00005162.2     | Actin-related protein 2/3 complex subunit 3                           | 2                     | 0.877                | 0.600                |                      | 0.739                                     | 0.196       |
| IPI00003783.1     | Dual specificity mitogen-activated protein kinase kinase 2            | 2                     | 0.755                | 0.660                | 0.802                | 0.739                                     | 0.072       |
| IPI00002857.1     | mitogen-activated protein kinase 14 isoform 2                         | 2                     | 0.741                |                      |                      | 0.741                                     |             |
| IPI00156689.3     | Synaptic vesicle membrane protein VAT-1 homolog                       | 6                     | 0.741                |                      |                      | 0.741                                     |             |
| IPI00305152.5     | SEC31L1 protein                                                       | 3                     | 0.752                |                      | 0.732                | 0.742                                     | 0.014       |

| <b>IPI Number</b> | <b>Protein Name</b>                                       | <b>Peptide number</b> | <b>Forward Set 1</b> | <b>Forward Set 2</b> | <b>Reverse Set 3</b> | <b>Average Ratio (Treated /Untreated)</b> | <b>S.D.</b> |
|-------------------|-----------------------------------------------------------|-----------------------|----------------------|----------------------|----------------------|-------------------------------------------|-------------|
| IPI00027423.2     | protein phosphatase 1, catalytic subunit, alpha isoform 3 | 2                     | 0.781                | 0.705                |                      | 0.743                                     | 0.054       |
| IPI00514380.1     | Pyrroline-5-carboxylate reductase family, member 2        | 2                     | 0.758                | 0.732                |                      | 0.745                                     | 0.018       |
| IPI00029133.4     | ATP synthase B chain, mitochondrial precursor             | 5                     | 0.746                |                      |                      | 0.746                                     |             |
| IPI00062151.4     | PREDICTED: similar to ribosomal protein L15               | 2                     | 0.746                |                      |                      | 0.746                                     |             |
| IPI00009368.3     | Sideroflexin-1                                            | 1                     | 0.758                | 0.733                | 0.749                | 0.747                                     | 0.012       |
| IPI00011253.3     | 40S ribosomal protein S3                                  | 4                     | 0.769                | 0.660                | 0.811                | 0.747                                     | 0.078       |
| IPI00004392.2     | 7,8-dihydro-8-oxoguanine triphosphatase                   | 2                     | 0.781                |                      | 0.715                | 0.748                                     | 0.047       |
| IPI00396421.2     | Protein KIAA0776                                          | 3                     | 0.758                | 0.734                | 0.754                | 0.749                                     | 0.013       |
| IPI00032892.1     | Geranylgeranyl pyrophosphate synthetase                   | 2                     | 0.758                | 0.759                | 0.732                | 0.750                                     | 0.015       |
| IPI00025974.3     | Charged multivesicular body protein 4b                    | 8                     | 0.901                | 0.600                |                      | 0.750                                     | 0.213       |
| IPI00298547.3     | Protein DJ-1                                              | 5                     | 0.935                | 0.990                | 0.327                | 0.750                                     | 0.368       |
| IPI00029468.1     | Alpha-centractin                                          | 4                     | 0.775                | 0.744                | 0.735                | 0.751                                     | 0.021       |
| IPI00005159.3     | Actin-like protein 2                                      | 7                     | 0.763                | 0.712                | 0.786                | 0.754                                     | 0.038       |
| IPI00023647.2     | Hypothetical protein DKFZp451P021                         | 2                     | 0.775                |                      | 0.733                | 0.754                                     | 0.030       |
| IPI00006684.3     | Splice Isoform 4 of Apoptosis inhibitor 5                 | 2                     |                      |                      | 0.754                | 0.754                                     |             |
| IPI00027255.1     | Myosin light chain 1, slow-twitch muscle A isoform        | 4                     | 0.769                | 0.743                | 0.751                | 0.754                                     | 0.013       |
| IPI00217949.11    | ubiquitin carrier protein                                 | 1                     | 0.865                | 0.754                | 0.645                | 0.755                                     | 0.110       |
| IPI00015952.1     | Eukaryotic translation initiation factor 4 gamma 2        | 2                     | 0.763                | 0.758                | 0.754                | 0.758                                     | 0.005       |
| IPI00027996.1     | Coronin-7                                                 | 2                     | 0.758                | 0.744                | 0.778                | 0.760                                     | 0.017       |
| IPI00010270.1     | Ras-related C3 botulinum toxin substrate 2                | 3                     | 0.741                | 0.780                |                      | 0.760                                     | 0.028       |

| <b>IPI Number</b> | <b>Protein Name</b>                                             | <b>Peptide number</b> | <b>Forward Set 1</b> | <b>Forward Set 2</b> | <b>Reverse Set 3</b> | <b>Average Ratio (Treated /Untreated)</b> | <b>S.D.</b> |
|-------------------|-----------------------------------------------------------------|-----------------------|----------------------|----------------------|----------------------|-------------------------------------------|-------------|
|                   | precursor                                                       |                       |                      |                      |                      |                                           |             |
| IPI00402008.4     | SAPS1 protein                                                   | 3                     | 0.781                | 0.740                |                      | 0.761                                     | 0.029       |
| IPI00103994.4     | Leucyl-tRNA synthetase, cytoplasmic                             | 5                     | 0.758                | 0.782                | 0.743                | 0.761                                     | 0.020       |
| IPI00011126.6     | 26S protease regulatory subunit 4                               | 2                     | 0.800                | 0.510                | 0.977                | 0.762                                     | 0.236       |
| IPI00221089.4     | 40S ribosomal protein S13                                       | 5                     | 0.735                | 0.832                | 0.733                | 0.767                                     | 0.057       |
| IPI00003406.2     | Drebrin                                                         | 6                     | 0.775                | 0.760                |                      | 0.768                                     | 0.011       |
| IPI00024664.1     | Splice Isoform Long of Ubiquitin carboxyl-terminal hydrolase 5  | 2                     | 0.794                | 0.743                |                      | 0.768                                     | 0.036       |
| IPI00218106.3     | Splice Isoform 2 of Transcription elongation factor A protein 1 | 3                     | 0.793                |                      | 0.752                | 0.772                                     | 0.029       |
| IPI00016621.6     | AP-2 complex subunit alpha-2                                    | 2                     | 0.654                | 0.866                | 0.801                | 0.774                                     | 0.109       |
| IPI00003021.1     | Sodium/potassium-transporting ATPase alpha-2 chain precursor    | 2                     | 0.794                |                      | 0.755                | 0.774                                     | 0.027       |
| IPI00026829.1     | Splice Isoform Long of Deoxyhypusine synthase                   | 4                     | 0.719                | 0.830                |                      | 0.775                                     | 0.078       |
| IPI00397526.1     | Myosin-10                                                       | 8                     | 0.800                | 0.750                |                      | 0.775                                     | 0.035       |
| IPI00022810.1     | Dipeptidyl-peptidase 1 precursor                                | 2                     | 0.775                |                      |                      | 0.775                                     |             |
| IPI00013452.8     | glutamyl-prolyl tRNA synthetase                                 | 5                     | 0.787                | 0.756                | 0.785                | 0.776                                     | 0.017       |
| IPI00023786.1     | Protein tyrosine phosphatase receptor type C-associated protein | 2                     | 0.676                | 0.813                | 0.843                | 0.777                                     | 0.089       |
| IPI00455457.4     | Novel protein similar to histone 2, H3c                         | 3                     |                      |                      | 0.778                | 0.778                                     |             |
| IPI00026216.4     | Puromycin-sensitive aminopeptidase                              | 2                     | 0.794                | 0.754                | 0.787                | 0.778                                     | 0.021       |
| IPI00003168.1     | Phosphoribosyl pyrophosphate synthetase-associated protein 2    | 5                     | 0.787                | 0.765                | 0.786                | 0.779                                     | 0.013       |

| <b>IPI Number</b> | <b>Protein Name</b>                                                    | <b>Peptide number</b> | <b>Forward Set 1</b> | <b>Forward Set 2</b> | <b>Reverse Set 3</b> | <b>Average Ratio (Treated /Untreated)</b> | <b>S.D.</b> |
|-------------------|------------------------------------------------------------------------|-----------------------|----------------------|----------------------|----------------------|-------------------------------------------|-------------|
| IPI00221092.7     | 40S ribosomal protein S16                                              | 8                     | 0.709                | 0.850                |                      | 0.780                                     | 0.100       |
| IPI00026182.4     | F-actin capping protein alpha-2 subunit                                | 2                     | 0.787                | 0.755                | 0.798                | 0.780                                     | 0.022       |
| IPI00019812.1     | Serine/threonine-protein phosphatase 5                                 | 5                     | 0.990                |                      | 0.571                | 0.781                                     | 0.296       |
| IPI00012497.1     | Beta-adrenergic receptor kinase 1                                      | 3                     | 0.800                |                      | 0.762                | 0.781                                     | 0.027       |
| IPI00023919.4     | 26S protease regulatory subunit 8                                      | 9                     | 0.775                |                      | 0.787                | 0.781                                     | 0.008       |
| IPI00291419.5     | Acetyl-CoA acetyltransferase, cytosolic                                | 6                     | 0.799                | 0.750                | 0.795                | 0.781                                     | 0.027       |
| IPI00013774.1     | Histone deacetylase 1                                                  | 2                     | 0.781                |                      |                      | 0.781                                     |             |
| IPI00470610.3     | Pyrroline-5-carboxylate reductase 2                                    | 3                     | 0.781                | 0.766                | 0.797                | 0.781                                     | 0.016       |
| IPI00012837.1     | Kinesin heavy chain                                                    | 5                     | 0.847                | 0.705                | 0.798                | 0.783                                     | 0.072       |
| IPI00295625.2     | Succinyl-CoA ligase [GDP-forming] alpha-chain, mitochondrial precursor | 2                     | 0.794                |                      | 0.785                | 0.789                                     | 0.006       |
| IPI00000760.1     | NG,NG-dimethylarginine dimethylaminohydrolase 2                        | 3                     | 0.559                |                      | 1.020                | 0.790                                     | 0.327       |
| IPI00016605.3     | Hypothetical protein FLJ20580                                          | 2                     | 0.787                | 0.784                | 0.798                | 0.790                                     | 0.007       |
| IPI00016768.2     | L-lactate dehydrogenase A-like 6B                                      | 2                     |                      | 0.790                |                      | 0.790                                     |             |
| IPI00026833.4     | Adenylosuccinate synthetase isozyme 2                                  | 7                     | 0.794                |                      |                      | 0.794                                     |             |
| IPI00027500.1     | Transforming protein RhoA precursor                                    | 2                     | 0.794                |                      | 0.798                | 0.796                                     | 0.003       |
| IPI00003348.2     | Guanine nucleotide-binding protein G(I)/G(S)/G(T) beta subunit 2       | 2                     | 0.862                | 0.730                |                      | 0.796                                     | 0.093       |
| IPI00419979.2     | p21-activated kinase 2                                                 | 3                     | 0.725                | 0.870                |                      | 0.797                                     | 0.103       |
| IPI00010201.4     | 26S proteasome non-ATPase regulatory subunit 8                         | 5                     | 0.606                |                      | 0.990                | 0.798                                     | 0.272       |
| IPI00013468.1     | Mitotic checkpoint protein BUB3                                        | 2                     | 0.813                | 0.787                |                      | 0.800                                     | 0.018       |
| IPI00333215.1     | Splice Isoform 1 of Transcription elongation                           | 2                     | 0.854                |                      | 0.752                | 0.803                                     | 0.072       |

| <b>IPI Number</b> | <b>Protein Name</b>                                                                   | <b>Peptide number</b> | <b>Forward Set 1</b> | <b>Forward Set 2</b> | <b>Reverse Set 3</b> | <b>Average Ratio (Treated /Untreated)</b> | <b>S.D.</b> |
|-------------------|---------------------------------------------------------------------------------------|-----------------------|----------------------|----------------------|----------------------|-------------------------------------------|-------------|
|                   | factor A protein 1                                                                    |                       |                      |                      |                      |                                           |             |
| IPI00015947.4     | DnaJ homolog subfamily B member 1                                                     | 3                     | 0.917                | 0.690                |                      | 0.804                                     | 0.161       |
| IPI00178440.2     | Elongation factor 1-beta                                                              | 3                     | 0.840                | 0.760                | 0.812                | 0.804                                     | 0.041       |
| IPI00016891.1     | Ras-related protein Rab-6B                                                            | 4                     | 0.877                | 0.693                | 0.843                | 0.804                                     | 0.098       |
| IPI00179709.4     | Splice Isoform 1 of Tubulin alpha-2 chain                                             | 4                     | 0.658                |                      | 0.952                | 0.805                                     | 0.208       |
| IPI00395425.3     | HSPC260                                                                               | 1                     | 0.800                |                      | 0.811                | 0.806                                     | 0.008       |
| IPI00017448.1     | 40S ribosomal protein S21                                                             | 1                     | 0.813                |                      | 0.798                | 0.806                                     | 0.011       |
| IPI00099986.5     | Ketosamine-3-kinase                                                                   | 1                     | 0.800                |                      | 0.812                | 0.806                                     | 0.008       |
| IPI00010349.1     | Alkyldihydroxyacetonephosphate synthase, peroxisomal precursor                        | 2                     | 0.806                |                      |                      | 0.806                                     |             |
| IPI00184533.1     | ubiquitin specific protease 11                                                        | 7                     | 0.862                | 0.760                | 0.798                | 0.807                                     | 0.052       |
| IPI00023529.1     | Cell division protein kinase 6                                                        | 4                     | 0.741                |                      | 0.873                | 0.807                                     | 0.094       |
| IPI00008454.1     | DnaJ homolog subfamily B member 11 precursor                                          | 4                     |                      | 0.807                |                      | 0.807                                     |             |
| IPI00246975.7     | Glutathione S-transferase Mu 3                                                        | 2                     | 0.813                | 0.821                | 0.805                | 0.813                                     | 0.008       |
| IPI00335061.6     | Pyrroline-5-carboxylate reductase family, member 2                                    | 4                     | 0.813                |                      |                      | 0.813                                     |             |
| IPI00008240.2     | Methionyl-tRNA synthetase                                                             | 3                     | 0.813                |                      |                      | 0.813                                     |             |
| IPI00011285.1     | Calpain-1 catalytic subunit                                                           | 4                     | 0.813                |                      |                      | 0.813                                     |             |
| IPI00295851.3     | Coatmer subunit beta                                                                  | 2                     | 0.806                | 0.822                | 0.811                | 0.813                                     | 0.008       |
| IPI00035167.7     | PREDICTED: similar to ribosomal protein L10a                                          | 2                     | 0.855                | 0.832                | 0.754                | 0.814                                     | 0.053       |
| IPI00030781.1     | Splice Isoform Alpha of Signal transducer and activator of transcription 1-alpha/beta | 6                     | 0.806                |                      | 0.821                | 0.814                                     | 0.010       |



| <b>IPI Number</b> | <b>Protein Name</b>                                                    | <b>Peptide number</b> | <b>Forward Set 1</b> | <b>Forward Set 2</b> | <b>Reverse Set 3</b> | <b>Average Ratio (Treated /Untreated)</b> | <b>S.D.</b> |
|-------------------|------------------------------------------------------------------------|-----------------------|----------------------|----------------------|----------------------|-------------------------------------------|-------------|
| IPI00007208.4     | Probable ATP-dependent RNA helicase DDX41                              | 2                     | 0.813                |                      | 0.819                | 0.816                                     | 0.004       |
| IPI00004845.4     | Protein NipSnap3A                                                      | 2                     | 0.813                |                      | 0.822                | 0.818                                     | 0.006       |
| IPI00156232.1     | 15 kDa protein                                                         | 2                     | 0.813                |                      | 0.822                | 0.818                                     | 0.006       |
| IPI00006079.1     | Splice Isoform 1 of Bcl-2-associated transcription factor 1            | 3                     | 0.820                |                      |                      | 0.820                                     |             |
| IPI00009123.1     | Nucleobindin-2 precursor                                               | 2                     | 0.820                |                      |                      | 0.820                                     |             |
| IPI00013068.1     | Eukaryotic translation initiation factor 3 subunit 6                   | 9                     | 0.826                | 0.823                | 0.812                | 0.821                                     | 0.008       |
| IPI00026665.1     | GlutaminyI-tRNA synthetase                                             | 2                     | 0.877                |                      | 0.767                | 0.822                                     | 0.078       |
| IPI00376503.1     | pyrroline-5-carboxylate reductase 1 isoform 2                          | 2                     | 0.806                | 0.843                | 0.821                | 0.823                                     | 0.018       |
| IPI00182757.9     | Splice Isoform 1 of Protein KIAA1967                                   | 3                     | 0.813                | 0.840                | 0.818                | 0.824                                     | 0.014       |
| IPI00007189.1     | Splice Isoform 1 of Cell division control protein 42 homolog precursor | 3                     | 0.699                | 0.950                |                      | 0.825                                     | 0.177       |
| IPI00031522.2     | Trifunctional enzyme alpha subunit, mitochondrial precursor            | 4                     | 0.862                | 0.790                |                      | 0.826                                     | 0.051       |
| IPI00185374.3     | 26S proteasome non-ATPase regulatory subunit 12                        | 2                     | 0.826                |                      |                      | 0.826                                     |             |
| IPI00011916.1     | Multisynthetase complex auxiliary component p38                        | 4                     | 0.826                |                      |                      | 0.826                                     |             |
| IPI00021537.4     | Splice Isoform 1 of Opioid growth factor receptor                      | 2                     | 0.826                |                      |                      | 0.826                                     |             |
| IPI00163505.2     | Splice Isoform 1 of RNA-binding region-containing protein 2            | 4                     | 0.826                |                      |                      | 0.826                                     |             |

| <b>IPI Number</b> | <b>Protein Name</b>                                                                                                | <b>Peptide number</b> | <b>Forward Set 1</b> | <b>Forward Set 2</b> | <b>Reverse Set 3</b> | <b>Average Ratio (Treated /Untreated)</b> | <b>S.D.</b> |
|-------------------|--------------------------------------------------------------------------------------------------------------------|-----------------------|----------------------|----------------------|----------------------|-------------------------------------------|-------------|
| IPI00015262.9     | Calponin-2                                                                                                         | 4                     | 0.847                | 0.822                | 0.812                | 0.827                                     | 0.018       |
| IPI00012970.1     | Serine/threonine-protein phosphatase 6                                                                             | 2                     | 0.877                | 0.753                | 0.854                | 0.828                                     | 0.066       |
| IPI00019926.3     | Beta-adrenergic receptor kinase 2                                                                                  | 2                     | 0.885                | 0.770                | 0.833                | 0.829                                     | 0.058       |
| IPI00002803.5     | Serine/threonine-protein kinase N1                                                                                 | 5                     | 0.855                | 0.812                | 0.823                | 0.830                                     | 0.022       |
| IPI00022793.4     | Trifunctional enzyme beta subunit, mitochondrial precursor                                                         | 2                     | 0.833                |                      |                      | 0.833                                     |             |
| IPI00019971.3     | Syntaxin-binding protein 2                                                                                         | 1                     | 0.833                |                      |                      | 0.833                                     |             |
| IPI00026670.3     | Transcription elongation factor B polypeptide 2                                                                    | 2                     | 0.833                |                      |                      | 0.833                                     |             |
| IPI00645194.1     | integrin beta 1 isoform 1A precursor                                                                               | 2                     | 0.833                |                      |                      | 0.833                                     |             |
| IPI00216008.3     | Splice Isoform Long of Glucose-6-phosphate 1-dehydrogenase                                                         | 5                     | 0.833                |                      |                      | 0.833                                     |             |
| IPI00003479.2     | Mitogen-activated protein kinase 1                                                                                 | 8                     | 0.833                |                      |                      | 0.833                                     |             |
| IPI00165360.4     | 3-mercaptopyruvate sulfurtransferase                                                                               | 4                     | 0.833                |                      |                      | 0.833                                     |             |
| IPI00021338.1     | Dihydrolipoyllysine-residue acetyltransferase component of pyruvate dehydrogenase complex, mitochondrial precursor | 3                     | 0.833                |                      |                      | 0.833                                     |             |
| IPI00006052.3     | Prefoldin subunit 2                                                                                                | 3                     | 0.855                | 0.730                | 0.917                | 0.834                                     | 0.095       |
| IPI00019894.2     | Splice Isoform 2 of Ubiquitin-conjugating enzyme E2-25 kDa                                                         | 2                     | 0.855                | 0.821                |                      | 0.838                                     | 0.024       |
| IPI00000875.5     | Elongation factor 1-gamma                                                                                          | 6                     | 0.935                | 0.770                | 0.811                | 0.839                                     | 0.086       |
| IPI00641319.1     | Ubiquitin-activating enzyme E1                                                                                     | 5                     | 0.833                | 0.850                | 0.833                | 0.839                                     | 0.010       |
| IPI00005040.1     | Medium-chain specific acyl-CoA dehydrogenase, mitochondrial precursor                                              | 3                     | 0.840                |                      |                      | 0.840                                     |             |
| IPI00219673.5     | Glutathione S-transferase kappa 1                                                                                  | 3                     | 0.840                |                      |                      | 0.840                                     |             |

| <b>IPI Number</b> | <b>Protein Name</b>                                           | <b>Peptide number</b> | <b>Forward Set 1</b> | <b>Forward Set 2</b> | <b>Reverse Set 3</b> | <b>Average Ratio (Treated /Untreated)</b> | <b>S.D.</b> |
|-------------------|---------------------------------------------------------------|-----------------------|----------------------|----------------------|----------------------|-------------------------------------------|-------------|
| IPI00176678.8     | RcADH5 (Fragment)                                             | 4                     | 0.840                |                      |                      | 0.840                                     |             |
| IPI00155601.1     | Protein LRP16                                                 | 4                     | 0.671                |                      | 1.010                | 0.841                                     | 0.240       |
| IPI00001636.1     | Ataxin-10                                                     | 2                     | 0.662                |                      | 1.020                | 0.841                                     | 0.253       |
| IPI00005614.5     | Splice Isoform Long of Spectrin beta chain, brain 1           | 4                     | 0.813                | 0.640                | 1.075                | 0.843                                     | 0.219       |
| IPI00006451.5     | Vesicle-fusing ATPase                                         | 1                     | 0.855                | 0.832                |                      | 0.843                                     | 0.016       |
| IPI00006440.4     | mitochondrial ribosomal protein S7                            | 4                     | 0.847                |                      |                      | 0.847                                     |             |
| IPI00031655.1     | Vacuolar protein sorting protein 25                           | 3                     | 0.847                |                      |                      | 0.847                                     |             |
| IPI00031691.1     | 60S ribosomal protein L9                                      | 7                     | 0.847                |                      |                      | 0.847                                     |             |
| IPI00413728.3     | Splice Isoform 1 of Spectrin alpha chain, brain               | 6                     | 0.820                | 0.650                | 1.075                | 0.848                                     | 0.214       |
| IPI00009335.1     | Brain protein 16                                              | 2                     | 0.855                |                      | 0.842                | 0.848                                     | 0.009       |
| IPI00027434.1     | Rho-related GTP-binding protein RhoC precursor                | 3                     | 0.758                |                      | 0.943                | 0.850                                     | 0.131       |
| IPI00015954.1     | GTP-binding protein SAR1a                                     | 3                     | 0.840                | 0.861                |                      | 0.851                                     | 0.015       |
| IPI00165393.1     | Acidic leucine-rich nuclear phosphoprotein 32 family member E | 3                     | 0.680                | 0.750                | 1.124                | 0.851                                     | 0.238       |
| IPI00219677.4     | Putative deoxyribose-phosphate aldolase                       | 2                     | 0.855                |                      |                      | 0.855                                     |             |
| IPI00220637.4     | Seryl-tRNA synthetase                                         | 4                     | 0.855                |                      |                      | 0.855                                     |             |
| IPI00288947.3     | Guanine nucleotide binding protein (G protein), q polypeptide | 3                     | 0.855                |                      |                      | 0.855                                     |             |
| IPI00026904.1     | Splice Isoform 1 of Adenylosuccinate lyase                    | 6                     | 0.877                | 0.834                | 0.855                | 0.855                                     | 0.022       |
| IPI00335132.2     | 22 kDa protein                                                | 3                     | 1.075                | 0.540                | 0.952                | 0.856                                     | 0.280       |
| IPI00008557.3     | insulin-like growth factor 2 mRNA binding protein 1           | 3                     | 0.877                | 0.880                | 0.811                | 0.856                                     | 0.039       |

| <b>IPI Number</b> | <b>Protein Name</b>                                                          | <b>Peptide number</b> | <b>Forward Set 1</b> | <b>Forward Set 2</b> | <b>Reverse Set 3</b> | <b>Average Ratio (Treated /Untreated)</b> | <b>S.D.</b> |
|-------------------|------------------------------------------------------------------------------|-----------------------|----------------------|----------------------|----------------------|-------------------------------------------|-------------|
| IPI00025491.1     | Eukaryotic initiation factor 4A-I                                            | 2                     | 0.935                | 0.880                | 0.754                | 0.856                                     | 0.093       |
| IPI00012835.1     | C-terminal-binding protein 1                                                 | 3                     | 0.943                | 0.770                |                      | 0.857                                     | 0.123       |
| IPI00012340.1     | Splicing factor, arginine/serine-rich 9                                      | 5                     |                      |                      | 0.857                | 0.857                                     |             |
| IPI00013939.3     | Splice Isoform 1 of Replication protein A 32 kDa subunit                     | 7                     | 0.735                |                      | 0.980                | 0.858                                     | 0.173       |
| IPI00033600.1     | Yeast sds22 homolog                                                          | 4                     | 0.935                | 0.630                | 1.010                | 0.858                                     | 0.201       |
| IPI00019502.2     | Myosin-9                                                                     | 6                     | 0.699                | 0.700                | 1.176                | 0.859                                     | 0.275       |
| IPI00169434.3     | Grb10 interacting GYF protein 2                                              | 2                     |                      |                      | 0.860                | 0.860                                     |             |
| IPI00011913.1     | Heterogeneous nuclear ribonucleoprotein A0                                   | 2                     | 0.885                | 0.875                | 0.831                | 0.864                                     | 0.029       |
| IPI00157456.1     | 15 kDa protein                                                               | 2                     | 0.885                |                      | 0.843                | 0.864                                     | 0.030       |
| IPI00550021.3     | 60S ribosomal protein L3                                                     | 4                     | 0.833                | 0.875                | 0.886                | 0.865                                     | 0.028       |
| IPI00027442.3     | Alanyl-tRNA synthetase                                                       | 5                     | 0.763                | 0.800                | 1.042                | 0.868                                     | 0.151       |
| IPI00021808.3     | Histidyl-tRNA synthetase                                                     | 2                     | 0.870                |                      |                      | 0.870                                     |             |
| IPI00217906.3     | Splice Isoform 2 of Guanine nucleotide-binding protein G(i), alpha-2 subunit | 6                     | 0.870                |                      |                      | 0.870                                     |             |
| IPI00374260.4     | PREDICTED: similar to ribosomal protein L10 isoform 1                        | 1                     | 0.870                |                      |                      | 0.870                                     |             |
| IPI00000477.2     | PNAS-139                                                                     | 2                     | 0.893                |                      | 0.847                | 0.870                                     | 0.032       |
| IPI00418823.3     | PREDICTED: similar to lactate dehydrogenase A-like 6B                        | 4                     | 0.877                | 0.810                | 0.926                | 0.871                                     | 0.058       |
| IPI00027350.2     | Peroxiredoxin-2                                                              | 5                     | 0.971                | 0.690                | 0.954                | 0.872                                     | 0.158       |
| IPI00000861.1     | Splice Isoform 1 of LIM and SH3 domain protein 1                             | 2                     | 0.735                | 0.760                | 1.124                | 0.873                                     | 0.217       |

| <b>IPI Number</b> | <b>Protein Name</b>                                                       | <b>Peptide number</b> | <b>Forward Set 1</b> | <b>Forward Set 2</b> | <b>Reverse Set 3</b> | <b>Average Ratio (Treated /Untreated)</b> | <b>S.D.</b> |
|-------------------|---------------------------------------------------------------------------|-----------------------|----------------------|----------------------|----------------------|-------------------------------------------|-------------|
| IPI00025091.1     | 40S ribosomal protein S11                                                 | 3                     | 0.826                | 0.920                |                      | 0.873                                     | 0.066       |
| IPI00298237.6     | Splice Isoform 1 of Tripeptidyl-peptidase 1 precursor                     | 2                     | 0.878                | 0.890                | 0.852                | 0.873                                     | 0.020       |
| IPI00019888.1     | Succinate semialdehyde dehydrogenase, mitochondrial precursor             | 3                     | 0.893                |                      | 0.854                | 0.873                                     | 0.027       |
| IPI00373924.1     | PREDICTED: similar to 40S ribosomal protein S3a isoform 1                 | 2                     | 0.843                | 0.865                | 0.916                | 0.875                                     | 0.037       |
| IPI00395769.2     | Splice Isoform Heart of ATP synthase gamma chain, mitochondrial precursor | 4                     | 0.862                | 0.910                | 0.852                | 0.875                                     | 0.031       |
| IPI00642211.3     | Aminopeptidase B                                                          | 2                     | 0.885                |                      | 0.865                | 0.875                                     | 0.014       |
| IPI00375380.3     | proteasome 26S non-ATPase subunit 13 isoform 2                            | 3                     | 0.917                | 0.854                | 0.855                | 0.875                                     | 0.036       |
| IPI00446769.3     | Splice Isoform 2 of Dehydrogenase/reductase SDR family member 6 precursor | 6                     | 0.641                |                      | 1.111                | 0.876                                     | 0.332       |
| IPI00183002.6     | Splice Isoform 1 of Protein phosphatase 1 regulatory subunit 12A          | 2                     | 0.855                |                      | 0.898                | 0.876                                     | 0.031       |
| IPI00027107.5     | Tu translation elongation factor, mitochondrial                           | 3                     | 0.911                | 0.850                | 0.870                | 0.877                                     | 0.031       |
| IPI00100197.3     | Splice Isoform 1 of NSFL1 cofactor p47                                    | 5                     | 0.806                | 0.950                |                      | 0.878                                     | 0.102       |
| IPI00293427.1     | zinc finger/RING finger 2                                                 | 2                     |                      | 0.880                | 0.877                | 0.879                                     | 0.002       |
| IPI00218993.1     | Splice Isoform Beta of Heat-shock protein 105 kDa                         | 3                     | 0.917                | 0.800                | 0.921                | 0.879                                     | 0.069       |
| IPI00002460.2     | Splice Isoform 1 of Annexin A7                                            | 3                     | 0.980                | 0.780                |                      | 0.880                                     | 0.142       |
| IPI00029628.1     | Reticulocalbin-2 precursor                                                | 3                     | 0.794                | 0.897                | 0.950                | 0.880                                     | 0.080       |
| IPI00382470.2     | Heat shock protein HSP 90-alpha 2                                         | 8                     | 0.877                | 0.870                | 0.896                | 0.881                                     | 0.013       |

| <b>IPI Number</b> | <b>Protein Name</b>                                                      | <b>Peptide number</b> | <b>Forward Set 1</b> | <b>Forward Set 2</b> | <b>Reverse Set 3</b> | <b>Average Ratio (Treated /Untreated)</b> | <b>S.D.</b> |
|-------------------|--------------------------------------------------------------------------|-----------------------|----------------------|----------------------|----------------------|-------------------------------------------|-------------|
| IPI00550069.2     | Ribonuclease inhibitor                                                   | 3                     | 0.952                | 0.810                |                      | 0.881                                     | 0.101       |
| IPI00465361.3     | 60S ribosomal protein L13                                                | 3                     | 0.862                | 0.910                | 0.873                | 0.882                                     | 0.025       |
| IPI00022796.1     | OTTHUMP00000031372                                                       | 5                     | 1.266                | 0.510                | 0.870                | 0.882                                     | 0.378       |
| IPI00029111.2     | DPYSL3 protein                                                           | 2                     |                      | 0.890                | 0.876                | 0.883                                     | 0.010       |
| IPI00027443.4     | cysteinyl-tRNA synthetase isoform c                                      | 4                     | 0.893                |                      | 0.876                | 0.884                                     | 0.012       |
| IPI00009790.1     | 6-phosphofructokinase type C                                             | 3                     | 0.901                | 0.740                | 1.013                | 0.885                                     | 0.137       |
| IPI00000495.1     | PNAS-125                                                                 | 2                     | 0.885                |                      | 0.854                | 0.869                                     |             |
| IPI00018873.1     | Splice Isoform 1 of Nicotinamide phosphoribosyltransferase               | 2                     | 0.885                |                      | 0.832                | 0.858                                     |             |
| IPI00007346.1     | Peptidyl-prolyl cis-trans isomerase H                                    | 3                     | 0.885                |                      | 0.943                | 0.914                                     |             |
| IPI00011250.3     | Ubiquitin carboxyl-terminal hydrolase isozyme L3                         | 2                     | 0.885                |                      | 0.862                | 0.873                                     |             |
| IPI00026185.5     | Splice Isoform 1 of F-actin capping protein beta subunit                 | 4                     | 0.735                | 0.720                | 1.205                | 0.887                                     | 0.276       |
| IPI00215790.5     | 60S ribosomal protein L38                                                | 2                     | 0.962                |                      | 0.812                | 0.887                                     | 0.106       |
| IPI00399089.4     | Mesoderm development candidate 2                                         | 2                     | 0.877                |                      | 0.897                | 0.887                                     | 0.014       |
| IPI00029267.1     | U2 small nuclear ribonucleoprotein B"                                    | 3                     | 0.901                | 0.890                | 0.873                | 0.888                                     | 0.014       |
| IPI00033130.3     | Ubiquitin-like 1-activating enzyme E1A                                   | 2                     | 0.840                | 0.590                | 1.235                | 0.888                                     | 0.325       |
| IPI00219156.6     | 60S ribosomal protein L30                                                | 3                     | 1.050                | 0.783                | 0.832                | 0.888                                     | 0.142       |
| IPI00291930.5     | Splice Isoform 1 of Epsin-4                                              | 2                     | 0.909                |                      | 0.873                | 0.891                                     | 0.026       |
| IPI00176696.1     | PREDICTED: similar to 40S ribosomal protein S26                          | 2                     | 0.962                |                      | 0.821                | 0.891                                     | 0.099       |
| IPI00003635.3     | Splice Isoform 2 of Endoplasmic reticulum-Golgi intermediate compartment | 7                     | 0.654                | 0.979                | 1.042                | 0.891                                     | 0.208       |

| <b>IPI Number</b> | <b>Protein Name</b>                                                          | <b>Peptide number</b> | <b>Forward Set 1</b> | <b>Forward Set 2</b> | <b>Reverse Set 3</b> | <b>Average Ratio (Treated /Untreated)</b> | <b>S.D.</b> |
|-------------------|------------------------------------------------------------------------------|-----------------------|----------------------|----------------------|----------------------|-------------------------------------------|-------------|
|                   | protein 1                                                                    |                       |                      |                      |                      |                                           |             |
| IPI00009149.2     | Splice Isoform 2 of Suppressor of G2 allele of SKP1 homolog                  | 2                     | 0.893                |                      |                      | 0.893                                     |             |
| IPI00028004.2     | Proteasome subunit beta type 3                                               | 3                     | 0.893                |                      |                      | 0.893                                     |             |
| IPI00414836.5     | OSTF1 protein                                                                | 4                     | 0.662                | 0.930                | 1.087                | 0.893                                     | 0.215       |
| IPI00034319.2     | Splice Isoform A of Protein CutA precursor                                   | 8                     | 0.990                | 0.810                | 0.885                | 0.895                                     | 0.090       |
| IPI00018931.6     | Vacuolar protein sorting 35                                                  | 4                     | 0.694                | 0.786                | 1.205                | 0.895                                     | 0.272       |
| IPI00001734.2     | Splice Isoform 1 of Phosphoserine aminotransferase                           | 4                     | 0.877                | 0.917                | 0.893                | 0.896                                     | 0.020       |
| IPI00019383.1     | Galactokinase                                                                | 3                     | 0.901                | 0.891                |                      | 0.896                                     | 0.007       |
| IPI00014424.1     | Elongation factor 1-alpha 2                                                  | 3                     | 0.903                | 0.920                | 0.866                | 0.896                                     | 0.028       |
| IPI00026119.6     | Ubiquitin-activating enzyme E1                                               | 4                     | 0.847                | 0.910                | 0.935                | 0.897                                     | 0.045       |
| IPI00298961.3     | Exportin-1                                                                   | 3                     | 0.893                |                      | 0.905                | 0.899                                     | 0.009       |
| IPI00218847.4     | Splice Isoform 2 of Low molecular weight phosphotyrosine protein phosphatase | 3                     | 0.990                | 0.810                |                      | 0.900                                     | 0.127       |
| IPI00031583.2     | Hypothetical protein DKFZp451D234                                            | 2                     | 0.901                |                      | 0.932                | 0.916                                     | 0.022       |
| IPI00382985.1     | AYP1 protein                                                                 | 3                     | 0.901                |                      | 0.984                | 0.942                                     | 0.059       |
| IPI00411636.1     | Splice Isoform 1 of Beta-catenin-like protein 1                              | 2                     | 0.901                |                      | 0.875                | 0.888                                     | 0.018       |
| IPI00743173.1     | Similar to Tubulin beta1                                                     | 1                     | 0.901                |                      | 0.912                | 0.906                                     | 0.008       |
| IPI00004860.2     | Arginyl-tRNA synthetase                                                      | 4                     | 0.901                |                      | 0.912                | 0.906                                     | 0.008       |
| IPI00013466.3     | Arsenical pump-driving ATPase                                                | 4                     | 0.901                |                      | 1.032                | 0.966                                     | 0.093       |
| IPI00304417.6     | Isocitrate dehydrogenase [NAD] subunit beta, mitochondrial precursor         | 6                     | 0.901                |                      | 1.102                | 1.001                                     | 0.142       |
| IPI00018755.1     | High mobility group protein 1-like 10                                        | 2                     | 1.163                | 0.540                | 1.000                | 0.901                                     | 0.323       |

| <b>IPI Number</b> | <b>Protein Name</b>                                                                      | <b>Peptide number</b> | <b>Forward Set 1</b> | <b>Forward Set 2</b> | <b>Reverse Set 3</b> | <b>Average Ratio (Treated /Untreated)</b> | <b>S.D.</b> |
|-------------------|------------------------------------------------------------------------------------------|-----------------------|----------------------|----------------------|----------------------|-------------------------------------------|-------------|
| IPI00412579.5     | 60S ribosomal protein L10a                                                               | 2                     | 0.870                |                      | 0.934                | 0.902                                     | 0.046       |
| IPI00396387.3     | guanine nucleotide binding protein-like 1                                                | 5                     | 0.833                |                      | 0.971                | 0.902                                     | 0.097       |
| IPI00335168.8     | myosin, light polypeptide 6, alkali, smooth muscle and non-muscle isoform 1              | 3                     | 0.752                | 0.870                | 1.087                | 0.903                                     | 0.170       |
| IPI00216237.4     | 60S ribosomal protein L36                                                                | 3                     | 0.821                | 1.080                | 0.812                | 0.904                                     | 0.152       |
| IPI00018262.1     | Acidic leucine-rich nuclear phosphoprotein 32 family member C                            | 4                     | 0.131                | 1.880                | 0.704                | 0.905                                     | 0.892       |
| IPI00552452.1     | Ubiquitin-activating enzyme E1                                                           | 3                     | 0.980                | 0.830                |                      | 0.905                                     | 0.106       |
| IPI00220487.3     | ATP synthase, H <sup>+</sup> transporting, mitochondrial F0 complex, subunit d isoform a | 6                     | 0.926                | 0.890                |                      | 0.908                                     | 0.025       |
| IPI00011284.1     | Catechol O-methyltransferase                                                             | 3                     | 0.909                |                      |                      | 0.909                                     |             |
| IPI00020008.1     | NEDD8 precursor                                                                          | 2                     | 0.909                |                      |                      | 0.909                                     |             |
| IPI00063827.1     | Splice Isoform 1 of Abhydrolase domain-containing protein 14B                            | 6                     | 0.909                |                      |                      | 0.909                                     |             |
| IPI00456969.1     | Dynein heavy chain, cytosolic                                                            | 1                     |                      |                      | 0.909                | 0.909                                     |             |
| IPI00027223.2     | Isocitrate dehydrogenase [NADP] cytoplasmic                                              | 2                     | 0.909                |                      |                      | 0.909                                     |             |
| IPI00216106.3     | Splice Isoform 3 of Putative GTP-binding protein PTD004                                  | 5                     | 0.909                | 0.900                | 0.923                | 0.911                                     | 0.012       |
| IPI00028006.1     | Proteasome subunit beta type 2                                                           | 7                     | 0.833                | 0.934                | 0.965                | 0.911                                     | 0.069       |
| IPI00008293.4     | PREDICTED: similar to 40S ribosomal protein S7                                           | 6                     | 0.901                |                      | 0.921                | 0.911                                     | 0.014       |
| IPI00290305.3     | TP53-regulating kinase                                                                   | 2                     | 0.909                | 0.933                | 0.891                | 0.911                                     | 0.021       |
| IPI00019927.2     | 26S proteasome non-ATPase regulatory subunit 7                                           | 3                     | 0.735                | 0.780                | 1.220                | 0.912                                     | 0.268       |



| <b>IPI Number</b> | <b>Protein Name</b>                                             | <b>Peptide number</b> | <b>Forward Set 1</b> | <b>Forward Set 2</b> | <b>Reverse Set 3</b> | <b>Average Ratio (Treated /Untreated)</b> | <b>S.D.</b> |
|-------------------|-----------------------------------------------------------------|-----------------------|----------------------|----------------------|----------------------|-------------------------------------------|-------------|
| IPI00328257.4     | Splice Isoform A of AP-1 complex subunit beta-1                 | 1                     | 0.893                |                      | 0.932                | 0.912                                     | 0.028       |
| IPI00011675.1     | Splice Isoform Sp100-HMG of Nuclear autoantigen Sp-100          | 3                     | 1.149                | 0.520                | 1.075                | 0.915                                     | 0.344       |
| IPI00013256.1     | Splice Isoform 1 of Cleavage stimulation factor, 64 kDa subunit | 2                     |                      |                      | 0.915                | 0.915                                     |             |
| IPI00216256.2     | Splice Isoform 2 of WD-repeat protein 1                         | 3                     | 0.909                |                      | 0.922                | 0.916                                     | 0.009       |
| IPI00219447.6     | Serine/threonine-protein kinase PAK 2                           | 5                     | 0.787                | 0.810                | 1.149                | 0.916                                     | 0.203       |
| IPI00012479.1     | FKSG17                                                          | 2                     | 0.917                |                      |                      | 0.917                                     |             |
| IPI00022305.4     | MSTP017                                                         | 1                     | 0.917                |                      |                      | 0.917                                     |             |
| IPI00031629.1     | Phosducin-like protein 3                                        | 1                     | 0.917                |                      |                      | 0.917                                     |             |
| IPI00174390.2     | 2'-phosphodiesterase                                            | 1                     | 0.917                |                      |                      | 0.917                                     |             |
| IPI00218606.6     | 40S ribosomal protein S23                                       | 2                     | 0.917                |                      |                      | 0.917                                     |             |
| IPI00304925.3     | Heat shock 70 kDa protein 1                                     | 2                     | 0.917                |                      |                      | 0.917                                     |             |
| IPI00414676.5     | Heat shock protein HSP 90-beta                                  | 2                     | 0.917                |                      |                      | 0.917                                     |             |
| IPI00641950.3     | Lung cancer oncogene 7                                          | 4                     | 0.877                | 0.730                | 1.149                | 0.919                                     | 0.213       |
| IPI00411639.1     | Laminin receptor-like protein LAMRL5                            | 5                     | 0.826                |                      | 1.013                | 0.920                                     | 0.132       |
| IPI00465260.3     | GARS protein                                                    | 5                     | 0.806                | 0.820                | 1.136                | 0.921                                     | 0.187       |
| IPI00056494.4     | 60S ribosomal protein L36a-like                                 | 3                     | 0.980                | 0.800                | 0.987                | 0.922                                     | 0.106       |
| IPI00179589.2     | Myotrophin                                                      | 3                     | 0.794                | 1.130                | 0.844                | 0.923                                     | 0.181       |
| IPI00290460.3     | Eukaryotic translation initiation factor 3 subunit 4            | 2                     | 0.877                | 0.960                | 0.932                | 0.923                                     | 0.042       |
| IPI00013877.2     | Splice Isoform 1 of Heterogeneous nuclear ribonucleoprotein H3  | 3                     |                      |                      | 0.923                | 0.923                                     |             |

| <b>IPI Number</b> | <b>Protein Name</b>                                                                               | <b>Peptide number</b> | <b>Forward Set 1</b> | <b>Forward Set 2</b> | <b>Reverse Set 3</b> | <b>Average Ratio (Treated /Untreated)</b> | <b>S.D.</b> |
|-------------------|---------------------------------------------------------------------------------------------------|-----------------------|----------------------|----------------------|----------------------|-------------------------------------------|-------------|
| IPI00294955.3     | U6 snRNA-associated Sm-like protein LSm4                                                          | 3                     |                      |                      | 0.923                | 0.923                                     |             |
| IPI00395694.1     | Splice Isoform 2 of Transportin 3                                                                 | 2                     | 0.926                |                      | 0.921                | 0.923                                     | 0.003       |
| IPI00218200.7     | B-cell receptor-associated protein 31                                                             | 3                     | 0.909                | 0.951                | 0.912                | 0.924                                     | 0.023       |
| IPI00072377.1     | Splice Isoform 1 of Protein SET                                                                   | 5                     | 0.893                | 0.850                | 1.031                | 0.925                                     | 0.095       |
| IPI00296441.4     | Adenosine deaminase                                                                               | 6                     | 0.709                | 0.830                | 1.235                | 0.925                                     | 0.275       |
| IPI00025419.5     | PREDICTED: similar to 40S ribosomal protein S3a (V-fos transformation effector protein) isoform 3 | 3                     | 0.862                | 0.790                | 1.124                | 0.925                                     | 0.176       |
| IPI00291005.7     | Malate dehydrogenase, cytoplasmic                                                                 | 5                     | 0.971                | 0.880                |                      | 0.925                                     | 0.064       |
| IPI00013475.1     | tubulin, beta 2                                                                                   | 2                     | 1.111                | 0.740                |                      | 0.926                                     | 0.262       |
| IPI00007074.4     | Tyrosyl-tRNA synthetase, cytoplasmic                                                              | 4                     | 0.917                | 0.870                | 0.990                | 0.926                                     | 0.060       |
| IPI00001364.2     | Splice Isoform A of GC-rich sequence DNA-binding factor homolog                                   | 2                     | 0.926                |                      |                      | 0.926                                     |             |
| IPI00018597.1     | Splice Isoform Long of Tyrosine-protein kinase SYK                                                | 2                     | 0.926                |                      |                      | 0.926                                     |             |
| IPI00022744.5     | Splice Isoform 1 of Importin-alpha re-exporter                                                    | 3                     | 0.926                |                      |                      | 0.926                                     |             |
| IPI00216105.1     | Splice Isoform 2 of Putative GTP-binding protein PTD004                                           | 2                     |                      | 0.910                | 0.942                | 0.926                                     | 0.023       |
| IPI00017596.2     | Microtubule-associated protein RP/EB family member 1                                              | 3                     | 0.901                | 0.660                | 1.220                | 0.927                                     | 0.281       |
| IPI00015306.4     | Melanoma-associated antigen E1                                                                    | 2                     | 0.928                |                      |                      | 0.928                                     |             |
| IPI00010460.1     | AH receptor-interacting protein                                                                   | 4                     | 0.885                | 0.670                | 1.235                | 0.930                                     | 0.285       |
| IPI00479359.6     | villin 2                                                                                          | 4                     | 0.893                | 0.810                | 1.087                | 0.930                                     | 0.142       |
| IPI00010154.3     | Rab GDP dissociation inhibitor alpha                                                              | 3                     | 0.909                | 0.770                | 1.111                | 0.930                                     | 0.172       |

| <b>IPI Number</b> | <b>Protein Name</b>                                                         | <b>Peptide number</b> | <b>Forward Set 1</b> | <b>Forward Set 2</b> | <b>Reverse Set 3</b> | <b>Average Ratio (Treated /Untreated)</b> | <b>S.D.</b> |
|-------------------|-----------------------------------------------------------------------------|-----------------------|----------------------|----------------------|----------------------|-------------------------------------------|-------------|
| IPI00305068.5     | U5 snRNP-associated 102 kDa protein                                         | 3                     | 0.917                |                      | 0.943                | 0.930                                     | 0.018       |
| IPI00410214.1     | Splice Isoform 1 of 3'(2'),5'-bisphosphate nucleotidase 1                   | 2                     | 0.935                |                      | 0.928                | 0.931                                     | 0.005       |
| IPI00219861.3     | acid phosphatase 1 isoform c                                                | 4                     |                      | 0.700                | 1.163                | 0.931                                     | 0.327       |
| IPI00220503.9     | dynactin 2                                                                  | 2                     | 0.870                | 0.790                | 1.136                | 0.932                                     | 0.181       |
| IPI00429191.2     | Eukaryotic peptide chain release factor subunit 1                           | 2                     | 0.935                |                      | 0.931                | 0.933                                     | 0.003       |
| IPI00006025.1     | Splice Isoform 1 of Squamous cell carcinoma antigen recognized by T-cells 3 | 2                     | 0.943                |                      | 0.923                | 0.933                                     | 0.014       |
| IPI00248321.8     | PREDICTED: similar to peptidylprolyl isomerase A isoform 1                  | 2                     | 0.926                |                      | 0.942                | 0.934                                     | 0.011       |
| IPI00007926.1     | c-Myc-responsive protein Rcl                                                | 2                     | 0.926                | 0.953                | 0.923                | 0.934                                     | 0.017       |
| IPI00247583.4     | 60S ribosomal protein L21                                                   | 4                     | 0.935                |                      |                      | 0.935                                     |             |
| IPI00337741.4     | Acylamino-acid-releasing enzyme                                             | 3                     | 0.935                |                      |                      | 0.935                                     |             |
| IPI00170935.1     | Leucine-rich repeat-containing protein 47                                   | 3                     | 0.893                | 0.880                | 1.031                | 0.935                                     | 0.084       |
| IPI00016342.1     | Ras-related protein Rab-7                                                   | 2                     | 0.962                | 0.910                |                      | 0.936                                     | 0.036       |
| IPI00022830.3     | Splice Isoform 2 of NSFL1 cofactor p47                                      | 3                     | 0.962                | 0.910                |                      | 0.936                                     | 0.036       |
| IPI00009253.1     | Alpha-soluble NSF attachment protein                                        | 3                     | 0.826                | 0.912                | 1.071                | 0.936                                     | 0.124       |
| IPI00140827.2     | PREDICTED: similar to SMT3 suppressor of mif two 3 homolog 2                | 5                     | 0.813                | 0.910                | 1.087                | 0.937                                     | 0.139       |
| IPI00299465.7     | leucine zipper transcription factor-like 1                                  | 3                     | 0.592                |                      | 1.282                | 0.937                                     | 0.488       |
| IPI00011200.4     | D-3-phosphoglycerate dehydrogenase                                          | 5                     | 0.862                | 0.800                | 1.149                | 0.937                                     | 0.186       |
| IPI00016572.1     | Small nuclear ribonucleoprotein G                                           | 1                     | 0.944                |                      | 0.932                | 0.938                                     | 0.008       |
| IPI00003848.1     | DnaJ homolog subfamily B member 4                                           | 2                     | 0.943                |                      | 0.933                | 0.938                                     | 0.007       |

| <b>IPI Number</b> | <b>Protein Name</b>                                               | <b>Peptide number</b> | <b>Forward Set 1</b> | <b>Forward Set 2</b> | <b>Reverse Set 3</b> | <b>Average Ratio (Treated /Untreated)</b> | <b>S.D.</b> |
|-------------------|-------------------------------------------------------------------|-----------------------|----------------------|----------------------|----------------------|-------------------------------------------|-------------|
| IPI00180637.4     | TIP41, TOR signalling pathway regulator-like isoform 1            | 3                     | 0.813                |                      | 1.064                | 0.938                                     | 0.177       |
| IPI00002134.3     | 26S proteasome non-ATPase regulatory subunit 5                    | 3                     | 0.943                |                      | 0.934                | 0.939                                     | 0.007       |
| IPI00413641.6     | Aldose reductase                                                  | 2                     | 0.943                |                      | 0.934                | 0.939                                     | 0.007       |
| IPI00006181.1     | Eukaryotic translation initiation factor 3 subunit 7              | 2                     | 0.935                |                      | 0.943                | 0.939                                     | 0.006       |
| IPI00009342.1     | Ras GTPase-activating-like protein IQGAP1                         | 3                     | 0.901                | 0.650                | 1.266                | 0.939                                     | 0.310       |
| IPI00165579.6     | PP856                                                             | 8                     | 0.870                | 1.010                |                      | 0.940                                     | 0.099       |
| IPI00009328.2     | Probable ATP-dependent RNA helicase DDX48                         | 3                     | 0.870                | 1.010                |                      | 0.940                                     | 0.099       |
| IPI00215901.1     | adenylate kinase 2 isoform a                                      | 2                     | 0.870                | 0.930                | 1.020                | 0.940                                     | 0.076       |
| IPI00168388.1     | Splice Isoform 1 of Signal recognition particle 68 kDa protein    | 5                     | 0.752                | 0.680                | 1.389                | 0.940                                     | 0.390       |
| IPI00100160.3     | Splice Isoform 1 of Cullin-associated NEDD8-dissociated protein 1 | 6                     | 0.855                | 0.790                | 1.176                | 0.940                                     | 0.207       |
| IPI00298994.5     | Talin-1                                                           | 2                     | 0.826                | 0.790                | 1.205                | 0.940                                     | 0.230       |
| IPI00029056.2     | Selenide, water dikinase 1                                        | 3                     | 0.840                |                      | 1.042                | 0.941                                     | 0.142       |
| IPI00183920.1     | BA395L14.12                                                       | 15                    | 0.877                | 1.100                | 0.846                | 0.941                                     | 0.138       |
| IPI00219299.2     | Talin-2                                                           | 2                     | 0.775                | 0.800                | 1.250                | 0.942                                     | 0.267       |
| IPI00025329.1     | 60S ribosomal protein L19                                         | 4                     | 0.813                |                      | 1.071                | 0.942                                     | 0.182       |
| IPI00009104.6     | RuvB-like 2                                                       | 3                     | 0.971                | 0.890                | 0.965                | 0.942                                     | 0.045       |
| IPI00294398.1     | Splice Isoform 1 of Short chain 3-hydroxyacyl-CoA dehydrogenase,  | 3                     | 0.926                | 0.850                | 1.053                | 0.943                                     | 0.102       |

| <b>IPI Number</b> | <b>Protein Name</b>                                                                      | <b>Peptide number</b> | <b>Forward Set 1</b> | <b>Forward Set 2</b> | <b>Reverse Set 3</b> | <b>Average Ratio (Treated /Untreated)</b> | <b>S.D.</b> |
|-------------------|------------------------------------------------------------------------------------------|-----------------------|----------------------|----------------------|----------------------|-------------------------------------------|-------------|
| IPI00302176.5     | mitochondrial precursor<br>Splice Isoform 1 of H/ACA ribonucleoprotein complex subunit 1 | 2                     |                      |                      | 0.943                | 0.943                                     |             |
| IPI00025318.1     | SH3 domain-binding glutamic acid-rich-like protein                                       | 2                     | 0.943                |                      |                      | 0.943                                     |             |
| IPI00031131.4     | Adipocyte plasma membrane-associated protein                                             | 2                     | 0.943                |                      |                      | 0.943                                     |             |
| IPI00007682.2     | Vacuolar ATP synthase catalytic subunit A, ubiquitous isoform                            | 3                     | 0.943                |                      |                      | 0.943                                     |             |
| IPI00375704.1     | Proteasome subunit beta type (Fragment)                                                  | 2                     | 0.952                |                      | 0.935                | 0.944                                     | 0.012       |
| IPI00552186.2     | Hypothetical protein DKFZp313O211                                                        | 2                     | 0.787                | 1.110                | 0.934                | 0.944                                     | 0.162       |
| IPI00005969.1     | F-actin capping protein alpha-1 subunit                                                  | 3                     | 0.909                | 0.760                | 1.163                | 0.944                                     | 0.204       |
| IPI00021766.4     | Splice Isoform 1 of Reticulon-4                                                          | 4                     | 1.010                | 0.880                |                      | 0.945                                     | 0.092       |
| IPI00303476.1     | ATP synthase beta chain, mitochondrial precursor                                         | 5                     | 0.893                | 1.030                | 0.913                | 0.945                                     | 0.074       |
| IPI00003565.1     | 26S proteasome non-ATPase regulatory subunit 10                                          | 4                     | 0.943                |                      | 0.948                | 0.946                                     | 0.003       |
| IPI00010896.2     | Chloride intracellular channel protein 1                                                 | 4                     | 0.855                | 0.820                | 1.163                | 0.946                                     | 0.189       |
| IPI00021435.2     | 26S protease regulatory subunit 7                                                        | 3                     | 0.917                |                      | 0.975                | 0.946                                     | 0.041       |
| IPI00168479.2     | apolipoprotein A-I binding protein precursor                                             | 4                     | 0.806                |                      | 1.087                | 0.947                                     | 0.198       |
| IPI00013070.2     | Splice Isoform 1 of Heterogeneous nuclear ribonucleoprotein U-like protein 1             | 3                     | 0.885                | 1.010                |                      | 0.947                                     | 0.088       |
| IPI00009946.4     | Mitochondrial import receptor subunit TOM34                                              | 2                     | 0.952                |                      | 0.943                | 0.948                                     | 0.007       |
| IPI00328587.4     | ENO1P protein                                                                            | 3                     | 1.020                | 0.920                | 0.903                | 0.948                                     | 0.063       |

| <b>IPI Number</b> | <b>Protein Name</b>                                                | <b>Peptide number</b> | <b>Forward Set 1</b> | <b>Forward Set 2</b> | <b>Reverse Set 3</b> | <b>Average Ratio (Treated /Untreated)</b> | <b>S.D.</b> |
|-------------------|--------------------------------------------------------------------|-----------------------|----------------------|----------------------|----------------------|-------------------------------------------|-------------|
| IPI00013949.1     | Small glutamine-rich tetratricopeptide repeat-containing protein A | 3                     | 0.893                | 0.830                | 1.124                | 0.949                                     | 0.155       |
| IPI00219365.2     | Moesin                                                             | 6                     | 0.794                | 0.720                | 1.333                | 0.949                                     | 0.335       |
| IPI00006980.1     | Protein C14orf166                                                  | 2                     |                      |                      | 0.949                | 0.949                                     |             |
| IPI00395627.3     | Splice Isoform 1 of Calcyclin-binding protein                      | 2                     | 0.909                | 0.790                | 1.149                | 0.950                                     | 0.183       |
| IPI00104050.3     | Thyroid hormone receptor-associated protein 3                      | 6                     |                      |                      | 0.950                | 0.950                                     |             |
| IPI00414127.3     | Ran-specific GTPase-activating protein                             | 2                     | 1.020                | 0.860                | 0.970                | 0.950                                     | 0.082       |
| IPI00004924.3     | IRF4-binding protein                                               | 8                     | 0.752                |                      | 1.149                | 0.951                                     | 0.281       |
| IPI00549467.2     | Nitrilase family, member 2                                         | 4                     | 0.826                | 0.850                | 1.176                | 0.951                                     | 0.196       |
| IPI00218918.4     | Annexin A1                                                         | 3                     | 0.532                | 0.970                | 1.351                | 0.951                                     | 0.410       |
| IPI00219153.3     | 60S ribosomal protein L22                                          | 9                     | 1.000                |                      | 0.902                | 0.951                                     | 0.069       |
| IPI00013296.1     | 40S ribosomal protein S18                                          | 3                     | 0.901                | 0.790                | 1.163                | 0.951                                     | 0.191       |
| IPI00299095.1     | Sorting nexin-2                                                    | 2                     | 0.787                | 0.877                | 1.190                | 0.952                                     | 0.212       |
| IPI00179953.2     | Splice Isoform 1 of Nuclear autoantigenic sperm protein            | 33                    | 0.990                | 0.950                | 0.915                | 0.952                                     | 0.038       |
| IPI00479997.3     | Stathmin                                                           | 4                     | 0.909                | 0.810                | 1.136                | 0.952                                     | 0.167       |
| IPI00008164.1     | Prolyl endopeptidase                                               | 4                     | 0.952                |                      |                      | 0.952                                     |             |
| IPI00013890.1     | 14-3-3 protein sigma                                               | 2                     | 0.952                |                      |                      | 0.952                                     |             |
| IPI00168317.1     | Hypothetical protein FLJ90806                                      | 2                     |                      |                      | 0.952                | 0.952                                     |             |
| IPI00182533.4     | 60S ribosomal protein L28                                          | 5                     | 0.952                |                      |                      | 0.952                                     |             |
| IPI00301434.4     | BolA-like protein 2 isoform a                                      | 6                     | 0.952                |                      |                      | 0.952                                     |             |
| IPI00012268.3     | 26S proteasome non-ATPase regulatory subunit 2                     | 3                     | 0.952                |                      |                      | 0.952                                     |             |
| IPI00550917.3     | Twinfilin-2                                                        | 2                     | 0.952                |                      |                      | 0.952                                     |             |

| <b>IPI Number</b> | <b>Protein Name</b>                                                                                       | <b>Peptide number</b> | <b>Forward Set 1</b> | <b>Forward Set 2</b> | <b>Reverse Set 3</b> | <b>Average Ratio (Treated /Untreated)</b> | <b>S.D.</b> |
|-------------------|-----------------------------------------------------------------------------------------------------------|-----------------------|----------------------|----------------------|----------------------|-------------------------------------------|-------------|
| IPI00026156.1     | Hematopoietic lineage cell-specific protein                                                               | 4                     | 0.735                | 0.790                | 1.333                | 0.953                                     | 0.331       |
| IPI00384051.4     | Proteasome activator complex subunit 2                                                                    | 5                     | 1.031                | 0.800                | 1.029                | 0.953                                     | 0.133       |
| IPI00014230.1     | Complement component 1, Q subcomponent-binding protein, mitochondrial precursor                           | 3                     | 1.031                | 0.920                | 0.915                | 0.955                                     | 0.065       |
| IPI00301109.3     | Splice Isoform 1 of Inorganic pyrophosphatase 2, mitochondrial precursor                                  | 2                     | 1.042                | 0.870                |                      | 0.956                                     | 0.121       |
| IPI00178352.4     | Splice Isoform 1 of Filamin-C                                                                             | 3                     |                      | 0.790                | 1.124                | 0.957                                     | 0.236       |
| IPI00386755.2     | ERO1-like protein alpha precursor                                                                         | 2                     | 0.962                |                      | 0.956                | 0.959                                     | 0.004       |
| IPI00290566.1     | T-complex protein 1 subunit alpha                                                                         | 4                     | 1.020                | 0.920                | 0.938                | 0.960                                     | 0.053       |
| IPI00029557.3     | GrpE protein homolog 1, mitochondrial precursor                                                           | 3                     | 0.971                |                      | 0.949                | 0.960                                     | 0.015       |
| IPI00000030.1     | Splice Isoform Delta-1 of Serine/threonine-protein phosphatase 2A 56 kDa regulatory subunit delta isoform | 2                     | 1.000                | 0.890                | 0.990                | 0.960                                     | 0.061       |
| IPI00018345.4     | caspase 2 isoform 3                                                                                       | 2                     | 0.962                |                      |                      | 0.962                                     |             |
| IPI00304435.3     | Protein NipSnap1                                                                                          | 4                     | 0.602                | 0.790                | 1.493                | 0.962                                     | 0.469       |
| IPI00030144.1     | Peptidyl-prolyl cis-trans isomerase                                                                       | 6                     | 0.935                | 0.760                | 1.190                | 0.962                                     | 0.217       |
| IPI00006935.2     | Eukaryotic translation initiation factor 5A-2                                                             | 4                     | 0.926                | 0.700                | 1.266                | 0.964                                     | 0.285       |
| IPI00004902.1     | electron-transfer-flavoprotein, beta polypeptide isoform 1                                                | 4                     | 0.826                | 0.800                | 1.266                | 0.964                                     | 0.262       |
| IPI00032957.1     | Ubiquitin-conjugating enzyme E2 I                                                                         | 2                     | 0.990                | 0.921                | 0.982                | 0.964                                     | 0.038       |
| IPI00215719.5     | 60S ribosomal protein L18                                                                                 | 3                     | 0.901                | 1.030                | 0.963                | 0.964                                     | 0.065       |
| IPI00217143.2     | SDHA protein                                                                                              | 2                     |                      |                      | 0.965                | 0.965                                     |             |

| <b>IPI Number</b> | <b>Protein Name</b>                                                | <b>Peptide number</b> | <b>Forward Set 1</b> | <b>Forward Set 2</b> | <b>Reverse Set 3</b> | <b>Average Ratio (Treated /Untreated)</b> | <b>S.D.</b> |
|-------------------|--------------------------------------------------------------------|-----------------------|----------------------|----------------------|----------------------|-------------------------------------------|-------------|
| IPI00328343.7     | Spliceosome RNA helicase BAT1                                      | 2                     |                      |                      | 0.965                | 0.965                                     |             |
| IPI00438229.1     | Splice Isoform 1 of Transcription intermediary factor 1-beta       | 3                     | 1.111                | 0.820                |                      | 0.966                                     | 0.206       |
| IPI00105598.3     | Proteasome 26S non-ATPase subunit 11 variant (Fragment)            | 5                     | 0.833                | 0.830                | 1.235                | 0.966                                     | 0.233       |
| IPI00001676.7     | Splice Isoform 2 of Nuclear protein localization protein 4 homolog | 3                     | 0.943                |                      | 0.989                | 0.966                                     | 0.032       |
| IPI00013508.5     | Alpha-actinin-1                                                    | 4                     | 0.800                | 0.800                | 1.299                | 0.966                                     | 0.288       |
| IPI00003766.4     | ETHE1 protein, mitochondrial precursor                             | 2                     | 0.714                |                      | 1.220                | 0.967                                     | 0.357       |
| IPI00021926.2     | 26S protease regulatory subunit S10B                               | 4                     | 0.806                | 0.860                | 1.235                | 0.967                                     | 0.233       |
| IPI00451401.2     | Splice Isoform 2 of Triosephosphate isomerase                      | 4                     | 0.952                | 0.920                | 1.038                | 0.970                                     | 0.061       |
| IPI00025019.3     | Proteasome subunit beta type 1                                     | 4                     | 0.901                | 0.760                | 1.250                | 0.970                                     | 0.252       |
| IPI00183274.2     | sorting nexin 1 isoform c                                          | 2                     | 0.971                |                      |                      | 0.971                                     |             |
| IPI00140420.4     | Staphylococcal nuclease domain-containing protein 1                | 2                     | 0.971                |                      |                      | 0.971                                     |             |
| IPI00010720.1     | T-complex protein 1 subunit epsilon                                | 2                     | 1.031                | 0.790                | 1.093                | 0.971                                     | 0.160       |
| IPI00014263.1     | eukaryotic translation initiation factor 4H isoform 1              | 3                     | 0.943                | 0.780                | 1.190                | 0.971                                     | 0.207       |
| IPI00028091.1     | Actin-like protein 3                                               | 4                     | 0.813                | 0.820                | 1.282                | 0.972                                     | 0.269       |
| IPI00106642.4     | Dihydropyrimidinase-like 2                                         | 4                     | 0.962                | 0.890                | 1.064                | 0.972                                     | 0.087       |
| IPI00329789.7     | Tyrosine-protein kinase ZAP-70                                     | 3                     | 0.725                |                      | 1.220                | 0.972                                     | 0.350       |
| IPI00075558.7     | PREDICTED: similar to 60S ribosomal protein L7a                    | 5                     | 0.877                | 1.070                |                      | 0.974                                     | 0.136       |
| IPI00221300.2     | Translation initiation factor eIF-2B alpha                         | 1                     | 0.974                |                      |                      | 0.974                                     |             |



| <b>IPI Number</b> | <b>Protein Name</b>                                                       | <b>Peptide number</b> | <b>Forward Set 1</b> | <b>Forward Set 2</b> | <b>Reverse Set 3</b> | <b>Average Ratio (Treated /Untreated)</b> | <b>S.D.</b> |
|-------------------|---------------------------------------------------------------------------|-----------------------|----------------------|----------------------|----------------------|-------------------------------------------|-------------|
|                   | subunit                                                                   |                       |                      |                      |                      |                                           |             |
| IPI00029048.2     | Tubulin--tyrosine ligase-like protein 12                                  | 3                     | 0.952                |                      | 0.996                | 0.974                                     | 0.031       |
| IPI00174852.4     | TRF-proximal protein homolog                                              | 2                     | 0.962                |                      | 0.987                | 0.974                                     | 0.018       |
| IPI00216048.8     | Phosphatidylinositol transfer protein alpha isoform                       | 2                     | 0.962                |                      | 0.987                | 0.974                                     | 0.018       |
| IPI00299524.1     | Condensin complex subunit 1                                               | 2                     | 0.962                |                      | 0.987                | 0.974                                     | 0.018       |
| IPI00021828.1     | Cystatin B                                                                | 3                     | 0.952                | 0.976                | 0.995                | 0.974                                     | 0.021       |
| IPI00302592.2     | Filamin A, alpha                                                          | 3                     | 0.901                | 0.860                | 1.163                | 0.975                                     | 0.164       |
| IPI00000812.1     | Cyclic nucleotide-gated cation channel alpha 3                            | 2                     | 0.962                |                      | 0.988                | 0.975                                     | 0.019       |
| IPI00186290.5     | Elongation factor 2                                                       | 2                     | 1.099                | 0.970                | 0.857                | 0.975                                     | 0.121       |
| IPI00329147.1     | FLJ31795 protein                                                          | 2                     | 0.971                | 0.981                |                      | 0.976                                     | 0.007       |
| IPI00007927.3     | Splice Isoform 1 of Structural maintenance of chromosome 2-like 1 protein | 2                     | 0.943                |                      | 1.010                | 0.977                                     | 0.047       |
| IPI00020042.2     | Splice Isoform 1 of 26S protease regulatory subunit 6B                    | 5                     | 0.847                | 0.850                | 1.235                | 0.977                                     | 0.223       |
| IPI00003438.1     | DnaJ (Hsp40) homolog, subfamily C, member 8                               | 3                     | 0.862                | 0.600                | 1.471                | 0.978                                     | 0.447       |
| IPI00156282.2     | G protein pathway suppressor 1 isoform 2                                  | 2                     | 0.971                |                      | 0.985                | 0.978                                     | 0.010       |
| IPI00026154.1     | Glucosidase 2 beta subunit precursor                                      | 2                     | 0.909                | 1.100                | 0.925                | 0.978                                     | 0.106       |
| IPI00216171.2     | Gamma-enolase                                                             | 7                     | 0.833                | 0.820                | 1.282                | 0.978                                     | 0.263       |
| IPI00013214.1     | DNA replication licensing factor MCM3                                     | 4                     | 0.862                | 0.870                | 1.205                | 0.979                                     | 0.196       |
| IPI00019770.3     | ubiquitin-like protein fubi and ribosomal protein S30 precursor           | 2                     |                      | 0.980                |                      | 0.980                                     |             |
| IPI00028412.1     | Sjogren syndrome/scleroderma autoantigen 1                                | 2                     | 0.980                |                      |                      | 0.980                                     |             |

| <b>IPI Number</b> | <b>Protein Name</b>                                             | <b>Peptide number</b> | <b>Forward Set 1</b> | <b>Forward Set 2</b> | <b>Reverse Set 3</b> | <b>Average Ratio (Treated /Untreated)</b> | <b>S.D.</b> |
|-------------------|-----------------------------------------------------------------|-----------------------|----------------------|----------------------|----------------------|-------------------------------------------|-------------|
| IPI00215888.3     | Signal recognition particle 72 kDa protein                      | 2                     | 0.980                |                      |                      | 0.980                                     |             |
| IPI00221225.3     | annexin IV                                                      | 3                     | 0.662                |                      | 1.299                | 0.980                                     | 0.450       |
| IPI00465436.3     | Catalase                                                        | 3                     | 0.901                | 0.970                | 1.071                | 0.980                                     | 0.085       |
| IPI00010402.2     | Hypothetical protein                                            | 7                     | 0.833                | 0.810                | 1.299                | 0.981                                     | 0.276       |
| IPI00219217.2     | L-lactate dehydrogenase B chain                                 | 4                     | 0.943                | 0.850                | 1.149                | 0.981                                     | 0.153       |
| IPI00010779.3     | Tropomyosin 4                                                   | 3                     | 0.725                | 0.810                | 1.408                | 0.981                                     | 0.373       |
| IPI00017184.2     | EH-domain-containing protein 1                                  | 3                     | 0.971                |                      | 0.993                | 0.982                                     | 0.016       |
| IPI00030876.4     | Protein diaphanous homolog 1                                    | 5                     | 0.935                | 0.780                | 1.235                | 0.983                                     | 0.231       |
| IPI00025849.1     | Acidic leucine-rich nuclear phosphoprotein 32 family member A   | 3                     | 0.901                | 0.830                | 1.220                | 0.983                                     | 0.207       |
| IPI00399212.2     | PREDICTED: similar to Ran-specific GTPase-activating protein    | 3                     | 1.075                | 0.800                | 1.075                | 0.984                                     | 0.159       |
| IPI00179330.6     | ubiquitin and ribosomal protein S27a precursor                  | 4                     | 0.917                | 1.130                | 0.903                | 0.984                                     | 0.127       |
| IPI00299573.11    | 60S ribosomal protein L7a                                       | 3                     | 0.855                | 1.060                | 1.038                | 0.984                                     | 0.113       |
| IPI00172460.3     | Splice Isoform 3 of Adenylate kinase isoenzyme 2, mitochondrial | 3                     | 0.800                | 0.820                | 1.333                | 0.984                                     | 0.302       |
| IPI00419585.8     | Peptidyl-prolyl cis-trans isomerase A                           | 4                     | 0.935                | 0.830                | 1.190                | 0.985                                     | 0.185       |
| IPI00219913.9     | Ubiquitin carboxyl-terminal hydrolase 14                        | 4                     | 0.885                | 0.790                | 1.282                | 0.986                                     | 0.261       |
| IPI00007755.2     | Ras-related protein Rab-21                                      | 2                     | 0.980                | 0.992                |                      | 0.986                                     | 0.008       |
| IPI00220301.4     | Peroxiredoxin-6                                                 | 2                     | 0.893                | 0.800                | 1.266                | 0.986                                     | 0.247       |
| IPI00010471.3     | Plastin-2                                                       | 6                     | 0.833                | 0.860                | 1.266                | 0.986                                     | 0.242       |
| IPI00011201.1     | NAD-dependent malic enzyme, mitochondrial precursor             | 3                     | 0.962                |                      | 1.012                | 0.987                                     | 0.036       |
| IPI00412607.5     | 60S ribosomal protein L35                                       | 1                     | 1.042                |                      | 0.932                | 0.987                                     | 0.078       |

| <b>IPI Number</b> | <b>Protein Name</b>                                                                          | <b>Peptide number</b> | <b>Forward Set 1</b> | <b>Forward Set 2</b> | <b>Reverse Set 3</b> | <b>Average Ratio (Treated /Untreated)</b> | <b>S.D.</b> |
|-------------------|----------------------------------------------------------------------------------------------|-----------------------|----------------------|----------------------|----------------------|-------------------------------------------|-------------|
| IPI00022430.1     | Glyceraldehyde-3-phosphate dehydrogenase, testis-specific                                    | 2                     | 0.877                | 0.850                | 1.235                | 0.987                                     | 0.215       |
| IPI00026689.4     | Hypothetical protein DKFZp686L20222                                                          | 2                     | 0.806                | 0.890                | 1.266                | 0.987                                     | 0.245       |
| IPI00000816.1     | 14-3-3 protein epsilon                                                                       | 5                     | 0.893                | 0.820                | 1.250                | 0.988                                     | 0.230       |
| IPI00396435.2     | DEAH (Asp-Glu-Ala-His) box polypeptide 15                                                    | 2                     | 0.912                |                      | 1.066                | 0.989                                     | 0.109       |
| IPI00032406.1     | DnaJ homolog subfamily A member 2                                                            | 2                     | 0.943                |                      | 1.035                | 0.989                                     | 0.065       |
| IPI00000494.5     | 60S ribosomal protein L5                                                                     | 2                     | 1.124                | 0.912                | 0.932                | 0.989                                     | 0.117       |
| IPI00013122.1     | Hsp90 co-chaperone Cdc37                                                                     | 8                     | 0.714                |                      | 1.266                | 0.990                                     | 0.390       |
| IPI00000335.1     | Histidine triad nucleotide-binding protein 2                                                 | 2                     | 0.990                |                      |                      | 0.990                                     |             |
| IPI00028031.2     | Splice Isoform 1 of Very-long-chain specific acyl-CoA dehydrogenase, mitochondrial precursor | 2                     | 0.990                |                      |                      | 0.990                                     |             |
| IPI00465256.3     | GTP:AMP phosphotransferase mitochondrial                                                     | 3                     |                      |                      | 0.990                | 0.990                                     |             |
| IPI00017283.2     | Isoleucyl-tRNA synthetase, mitochondrial precursor                                           | 2                     | 0.990                |                      |                      | 0.990                                     |             |
| IPI00012998.2     | Splice Isoform 1 of Cleavage and polyadenylation specificity factor 6                        | 3                     | 0.885                | 0.820                | 1.266                | 0.990                                     | 0.241       |
| IPI00303954.3     | cytochrome b5 outer mitochondrial membrane precursor                                         | 2                     | 1.031                | 0.950                |                      | 0.990                                     | 0.057       |
| IPI00383751.1     | CALRETICULIN=CALCIUM binding protein (Fragment)                                              | 2                     | 0.870                | 1.090                | 1.013                | 0.991                                     | 0.112       |
| IPI00218667.2     | Stathmin-2                                                                                   | 4                     | 0.813                | 0.790                | 1.370                | 0.991                                     | 0.328       |
| IPI00465430.5     | 70 kDa protein                                                                               | 2                     | 0.917                | 0.990                | 1.067                | 0.991                                     | 0.075       |
| IPI00165222.3     | 15 kDa protein                                                                               | 2                     | 0.932                |                      | 1.051                | 0.992                                     | 0.084       |

| <b>IPI Number</b> | <b>Protein Name</b>                                                           | <b>Peptide number</b> | <b>Forward Set 1</b> | <b>Forward Set 2</b> | <b>Reverse Set 3</b> | <b>Average Ratio (Treated /Untreated)</b> | <b>S.D.</b> |
|-------------------|-------------------------------------------------------------------------------|-----------------------|----------------------|----------------------|----------------------|-------------------------------------------|-------------|
| IPI00017367.5     | Radixin                                                                       | 3                     | 0.847                | 0.880                | 1.250                | 0.992                                     | 0.224       |
| IPI00032826.1     | Hsc70-interacting protein                                                     | 4                     | 0.826                | 0.870                | 1.282                | 0.993                                     | 0.251       |
| IPI00217872.3     | Phosphoglucomutase 1                                                          | 2                     | 0.917                |                      | 1.070                | 0.994                                     | 0.108       |
| IPI00293434.1     | Signal recognition particle 14 kDa protein                                    | 2                     | 0.917                | 1.070                |                      | 0.994                                     | 0.108       |
| IPI00026138.3     | PREDICTED: similar to ribosomal protein S3a isoform 1                         | 3                     | 0.833                | 0.850                | 1.299                | 0.994                                     | 0.264       |
| IPI00013109.1     | PREDICTED: similar to transcription elongation factor B (SIII), polypeptide 1 | 2                     | 0.971                |                      | 1.021                | 0.996                                     | 0.035       |
| IPI00293276.9     | Macrophage migration inhibitory factor                                        | 3                     | 1.087                | 0.870                | 1.031                | 0.996                                     | 0.113       |
| IPI00456359.1     | Splice Isoform 1 of Ataxin-2-like protein                                     | 2                     | 0.952                |                      | 1.042                | 0.997                                     | 0.063       |
| IPI00018146.1     | 14-3-3 protein theta                                                          | 2                     | 0.893                | 0.850                | 1.250                | 0.998                                     | 0.220       |
| IPI00023503.3     | Cell division protein kinase 3                                                | 2                     | 1.087                |                      | 0.909                | 0.998                                     | 0.126       |
| IPI00021428.1     | Actin, alpha skeletal muscle                                                  | 3                     | 0.800                | 1.102                | 1.095                | 0.999                                     | 0.172       |
| IPI00299507.5     | Condensin complex subunit 2                                                   | 2                     | 1.000                |                      |                      | 1.000                                     |             |
| IPI00017381.1     | Activator 1 37 kDa subunit                                                    | 2                     |                      |                      | 1.000                | 1.000                                     |             |
| IPI00220642.6     | 14-3-3 protein gamma                                                          | 4                     | 0.840                | 0.910                | 1.250                | 1.000                                     | 0.219       |
| IPI00017451.1     | Splicing factor 3 subunit 1                                                   | 2                     | 0.980                | 1.020                |                      | 1.000                                     | 0.028       |
| IPI00217966.6     | lactate dehydrogenase A                                                       | 2                     | 0.885                | 0.850                | 1.266                | 1.000                                     | 0.231       |
| IPI00044779.1     | TC4 protein                                                                   | 3                     | 0.877                |                      | 1.124                | 1.000                                     | 0.174       |
| IPI00012048.1     | Nucleoside diphosphate kinase A                                               | 3                     | 1.020                | 0.940                | 1.042                | 1.001                                     | 0.054       |
| IPI00292020.3     | Spermidine synthase                                                           | 2                     | 0.800                |                      | 1.205                | 1.002                                     | 0.286       |
| IPI00215637.4     | ATP-dependent RNA helicase DDX3X                                              | 2                     | 1.042                | 0.950                | 1.018                | 1.003                                     | 0.048       |
| IPI00215911.2     | DNA-(apurinic or apyrimidinic site) lyase                                     | 5                     | 0.943                |                      | 1.064                | 1.004                                     | 0.085       |
| IPI00006056.1     | Guanine nucleotide-binding protein-like 1                                     | 2                     | 0.980                |                      | 1.029                | 1.004                                     | 0.034       |

| <b>IPI Number</b> | <b>Protein Name</b>                                                        | <b>Peptide number</b> | <b>Forward Set 1</b> | <b>Forward Set 2</b> | <b>Reverse Set 3</b> | <b>Average Ratio (Treated /Untreated)</b> | <b>S.D.</b> |
|-------------------|----------------------------------------------------------------------------|-----------------------|----------------------|----------------------|----------------------|-------------------------------------------|-------------|
| IPI00413587.2     | Splice Isoform 1 of BH3-interacting domain death agonist                   | 3                     | 0.847                |                      | 1.163                | 1.005                                     | 0.223       |
| IPI00299000.4     | Proliferation-associated protein 2G4                                       | 3                     | 1.031                | 1.020                | 0.965                | 1.005                                     | 0.035       |
| IPI00010153.5     | 60S ribosomal protein L23                                                  | 2                     | 0.971                | 1.040                |                      | 1.005                                     | 0.049       |
| IPI00021263.3     | 14-3-3 protein zeta/delta                                                  | 2                     | 0.800                | 0.850                | 1.370                | 1.007                                     | 0.316       |
| IPI00071180.1     | Splice Isoform 2 of Ubiquilin-1                                            | 2                     | 1.015                |                      | 1.000                | 1.008                                     | 0.011       |
| IPI00011619.4     | Bifunctional 3'-phosphoadenosine 5'-phosphosulfate synthetase 1            | 4                     | 0.699                |                      | 1.316                | 1.008                                     | 0.436       |
| IPI00029623.1     | Proteasome subunit alpha type 6                                            | 2                     | 0.917                | 0.790                | 1.316                | 1.008                                     | 0.274       |
| IPI00290142.5     | CTP synthase                                                               | 4                     | 0.917                | 0.840                | 1.266                | 1.008                                     | 0.227       |
| IPI00376005.1     | Eukaryotic initiation factor 5A isoform I variant A                        | 4                     | 1.099                | 0.920                |                      | 1.009                                     | 0.127       |
| IPI00293533.3     | Nuclear pore glycoprotein p62                                              | 1                     | 1.010                |                      |                      | 1.010                                     |             |
| IPI00029444.1     | MYG1 protein                                                               | 2                     | 1.010                |                      |                      | 1.010                                     |             |
| IPI00296526.4     | N-acetylglucosamine kinase                                                 | 2                     | 1.010                |                      |                      | 1.010                                     |             |
| IPI00011177.1     | IFP38                                                                      | 3                     | 0.901                | 1.110                | 1.021                | 1.011                                     | 0.105       |
| IPI00020956.1     | Hepatoma-derived growth factor                                             | 3                     | 0.833                | 0.900                | 1.299                | 1.011                                     | 0.252       |
| IPI00167572.4     | Protein FAM98B                                                             | 2                     | 1.000                |                      | 1.022                | 1.011                                     | 0.016       |
| IPI00166768.2     | TUBA6 protein                                                              | 5                     | 0.935                | 0.910                | 1.190                | 1.012                                     | 0.155       |
| IPI00289807.3     | Splice Isoform 1 of tRNA-nucleotidyltransferase 1, mitochondrial precursor | 2                     | 0.980                | 1.012                | 1.043                | 1.012                                     | 0.031       |
| IPI00419880.5     | 40S ribosomal protein S3a                                                  | 3                     | 0.847                | 0.780                | 1.408                | 1.012                                     | 0.345       |
| IPI00029744.1     | Single-stranded DNA-binding protein,                                       | 2                     |                      | 1.010                | 1.015                | 1.013                                     | 0.004       |

| <b>IPI Number</b> | <b>Protein Name</b>                                                      | <b>Peptide number</b> | <b>Forward Set 1</b> | <b>Forward Set 2</b> | <b>Reverse Set 3</b> | <b>Average Ratio (Treated /Untreated)</b> | <b>S.D.</b> |
|-------------------|--------------------------------------------------------------------------|-----------------------|----------------------|----------------------|----------------------|-------------------------------------------|-------------|
|                   | mitochondrial precursor                                                  |                       |                      |                      |                      |                                           |             |
| IPI00026089.3     | Splicing factor 3B subunit 1                                             | 3                     | 0.926                | 1.105                | 1.008                | 1.013                                     | 0.090       |
| IPI00003817.1     | Rho GDP-dissociation inhibitor 2                                         | 2                     | 1.010                | 0.780                | 1.250                | 1.013                                     | 0.235       |
| IPI00024915.2     | Peroxiredoxin-5, mitochondrial precursor                                 | 4                     | 0.885                | 0.890                | 1.266                | 1.014                                     | 0.218       |
| IPI00022648.2     | Eukaryotic translation initiation factor 5                               | 2                     | 1.064                |                      | 0.965                | 1.014                                     | 0.070       |
| IPI00554786.2     | Thioredoxin reductase 1, cytoplasmic precursor                           | 3                     | 1.099                | 0.931                |                      | 1.015                                     | 0.119       |
| IPI00293350.3     | Translin-associated protein X                                            | 3                     | 0.909                | 1.067                | 1.070                | 1.015                                     | 0.092       |
| IPI00018398.4     | 26S protease regulatory subunit 6A                                       | 3                     | 1.010                | 0.900                | 1.136                | 1.015                                     | 0.118       |
| IPI00001639.2     | Importin beta-1 subunit                                                  | 5                     | 0.901                | 0.880                | 1.266                | 1.016                                     | 0.217       |
|                   | PREDICTED: similar to 40S ribosomal protein                              |                       |                      |                      |                      |                                           |             |
| IPI00376667.3     | S3a (V-fos transformation effector protein) isoform 1                    | 2                     | 0.820                | 0.820                | 1.408                | 1.016                                     | 0.340       |
| IPI00015148.3     | Ras-related protein Rap-1b precursor                                     | 3                     | 0.952                | 0.910                | 1.187                | 1.017                                     | 0.149       |
| IPI00003949.1     | Ubiquitin-conjugating enzyme E2 N                                        | 4                     | 0.769                | 0.810                | 1.471                | 1.017                                     | 0.394       |
| IPI00027165.3     | Splice Isoform R-type of Pyruvate kinase isozymes R/L                    | 2                     | 0.893                | 0.570                | 1.587                | 1.017                                     | 0.520       |
| IPI00011511.1     | Splice Isoform 2 of Cat eye syndrome critical region protein 5 precursor | 2                     | 0.885                |                      | 1.149                | 1.017                                     | 0.187       |
| IPI00418262.3     | Fructose-bisphosphate aldolase C                                         | 3                     | 0.990                | 0.780                | 1.282                | 1.017                                     | 0.252       |
| IPI00002966.1     | Heat shock 70 kDa protein 4                                              | 4                     | 0.943                | 0.860                | 1.250                | 1.018                                     | 0.205       |
| IPI00003362.2     | Hypothetical protein                                                     | 8                     | 1.031                | 1.120                | 0.903                | 1.018                                     | 0.109       |
| IPI00301518.5     | Mob4B protein                                                            | 4                     | 0.833                |                      | 1.205                | 1.019                                     | 0.263       |
| IPI00182856.10    | Splice Isoform 3 of WD-repeat protein 1                                  | 2                     | 0.935                | 1.104                |                      | 1.019                                     | 0.120       |
| IPI00002459.4     | annexin VI isoform 2                                                     | 7                     | 0.917                | 0.790                | 1.351                | 1.020                                     | 0.294       |

| <b>IPI Number</b> | <b>Protein Name</b>                                                                  | <b>Peptide number</b> | <b>Forward Set 1</b> | <b>Forward Set 2</b> | <b>Reverse Set 3</b> | <b>Average Ratio (Treated /Untreated)</b> | <b>S.D.</b> |
|-------------------|--------------------------------------------------------------------------------------|-----------------------|----------------------|----------------------|----------------------|-------------------------------------------|-------------|
| IPI00374975.2     | Probable phosphoglycerate mutase 4<br>Splice Isoform 2 of Succinyl-CoA ligase        | 3                     | 0.833                | 0.910                | 1.316                | 1.020                                     | 0.259       |
| IPI00217232.2     | [ADP-forming] beta-chain, mitochondrial precursor                                    | 2                     | 1.020                |                      |                      | 1.020                                     |             |
| IPI00007611.1     | ATP synthase O subunit, mitochondrial precursor                                      | 3                     | 0.962                | 1.030                | 1.071                | 1.021                                     | 0.055       |
| IPI00000877.1     | 150 kDa oxygen-regulated protein precursor                                           | 6                     | 1.064                | 0.870                | 1.129                | 1.021                                     | 0.135       |
| IPI00003933.2     | hydroxyacyl glutathione hydrolase isoform 1                                          | 3                     | 0.980                | 1.012                | 1.071                | 1.021                                     | 0.046       |
| IPI00179357.1     | Titin                                                                                | 1                     |                      | 1.000                | 1.043                | 1.022                                     | 0.030       |
| IPI00397774.2     | PREDICTED: similar to laminin receptor 1                                             | 2                     | 0.952                | 0.950                | 1.163                | 1.022                                     | 0.122       |
| IPI00007102.3     | CGI-150 protein                                                                      | 4                     | 1.020                | 0.810                | 1.238                | 1.023                                     | 0.214       |
| IPI00010796.1     | Protein disulfide-isomerase precursor                                                | 6                     | 0.943                | 1.040                | 1.086                | 1.023                                     | 0.073       |
| IPI00020436.3     | Ras-related protein Rab-11B                                                          | 4                     | 1.000                | 0.850                | 1.220                | 1.023                                     | 0.186       |
| IPI00215780.4     | 40S ribosomal protein S19                                                            | 2                     | 0.909                | 0.970                | 1.193                | 1.024                                     | 0.149       |
| IPI00413778.5     | FK506-binding protein 1A                                                             | 3                     | 1.031                | 0.760                | 1.282                | 1.024                                     | 0.261       |
| IPI00299254.3     | Eukaryotic translation initiation factor 5B                                          | 3                     | 0.962                |                      | 1.087                | 1.024                                     | 0.089       |
| IPI00016832.1     | Splice Isoform Short of Proteasome subunit alpha type 1                              | 2                     | 0.935                | 0.840                | 1.299                | 1.024                                     | 0.242       |
| IPI00024175.3     | Splice Isoform 1 of Proteasome subunit alpha type 7                                  | 3                     | 0.901                | 0.840                | 1.333                | 1.025                                     | 0.269       |
| IPI00037283.2     | Splice Isoform 5 of Dynamin-1-like protein<br>PREDICTED: similar to Phosphoglycerate | 2                     | 0.833                | 1.023                | 1.220                | 1.025                                     | 0.193       |
| IPI00453476.2     | mutase 1 (Phosphoglycerate mutase isozyme B) (PGAM-B) (BPG-dependent PGAM 1)         | 4                     | 0.787                | 0.920                | 1.370                | 1.026                                     | 0.305       |

| <b>IPI Number</b> | <b>Protein Name</b>                                   | <b>Peptide number</b> | <b>Forward Set 1</b> | <b>Forward Set 2</b> | <b>Reverse Set 3</b> | <b>Average Ratio (Treated /Untreated)</b> | <b>S.D.</b> |
|-------------------|-------------------------------------------------------|-----------------------|----------------------|----------------------|----------------------|-------------------------------------------|-------------|
|                   | isoform 1                                             |                       |                      |                      |                      |                                           |             |
| IPI00015911.1     | Dihydrolipoyl dehydrogenase, mitochondrial precursor  | 2                     | 1.020                | 1.032                |                      | 1.026                                     | 0.008       |
| IPI00019755.3     | Glutathione transferase omega-1                       | 2                     | 0.893                | 0.870                | 1.316                | 1.026                                     | 0.251       |
| IPI00014587.1     | Splice Isoform Brain of Clathrin light chain A        | 2                     | 1.000                |                      | 1.053                | 1.026                                     | 0.037       |
| IPI00216319.2     | 14-3-3 protein eta                                    | 3                     | 0.926                | 0.820                | 1.333                | 1.026                                     | 0.271       |
| IPI00020672.4     | Splice Isoform 1 of Dipeptidyl-peptidase 3            | 3                     | 0.833                |                      | 1.220                | 1.026                                     | 0.273       |
| IPI00023728.1     | Gamma-glutamyl hydrolase precursor                    | 3                     | 1.031                |                      | 1.022                | 1.026                                     | 0.006       |
| IPI00016746.1     | Core-binding factor subunit beta                      | 2                     | 1.010                | 1.044                |                      | 1.027                                     | 0.024       |
| IPI00021187.3     | RuvB-like 1                                           | 3                     | 1.075                | 0.980                |                      | 1.028                                     | 0.067       |
| IPI00645078.1     | Ubiquitin-activating enzyme E1                        | 4                     | 0.862                | 0.870                | 1.351                | 1.028                                     | 0.280       |
| IPI00301994.5     | Hypothetical protein DKFZp434N062                     | 2                     | 0.806                |                      | 1.250                | 1.028                                     | 0.314       |
| IPI00293655.3     | ATP-dependent RNA helicase DDX1                       | 2                     | 0.971                |                      | 1.087                | 1.029                                     | 0.082       |
| IPI00295400.1     | Tryptophanyl-tRNA synthetase                          | 2                     | 0.971                | 0.912                | 1.205                | 1.029                                     | 0.155       |
| IPI00641181.4     | MARCKS-related protein                                | 2                     |                      | 1.030                |                      | 1.030                                     |             |
| IPI00013290.4     | 75 kDa protein                                        | 2                     | 0.962                |                      | 1.099                | 1.030                                     | 0.097       |
| IPI00015018.1     | Inorganic pyrophosphatase                             | 2                     | 1.042                | 0.860                | 1.190                | 1.031                                     | 0.166       |
| IPI00291928.7     | Ras-related protein Rab-14                            | 3                     | 1.031                |                      |                      | 1.031                                     |             |
| IPI00293721.3     | Aflatoxin B1 aldehyde reductase member 3              | 2                     | 1.108                |                      | 0.954                | 1.031                                     | 0.109       |
| IPI00029012.1     | Eukaryotic translation initiation factor 3 subunit 10 | 4                     | 0.826                | 0.970                | 1.299                | 1.032                                     | 0.242       |
| IPI00216318.4     | 14-3-3 protein beta/alpha                             | 5                     | 0.885                | 0.860                | 1.351                | 1.032                                     | 0.277       |
| IPI00300285.4     | Hypothetical protein DKFZp564D1378                    | 2                     | 0.800                |                      | 1.266                | 1.033                                     | 0.329       |
| IPI00007752.1     | Tubulin beta-2C chain                                 | 2                     | 1.031                | 0.850                | 1.220                | 1.033                                     | 0.185       |



| <b>IPI Number</b> | <b>Protein Name</b>                                      | <b>Peptide number</b> | <b>Forward Set 1</b> | <b>Forward Set 2</b> | <b>Reverse Set 3</b> | <b>Average Ratio (Treated /Untreated)</b> | <b>S.D.</b> |
|-------------------|----------------------------------------------------------|-----------------------|----------------------|----------------------|----------------------|-------------------------------------------|-------------|
| IPI00171199.4     | Splice Isoform 2 of Proteasome subunit alpha type 3      | 2                     | 0.952                | 0.850                | 1.299                | 1.034                                     | 0.235       |
| IPI00216691.4     | Profilin-1                                               | 5                     | 0.862                | 0.890                | 1.351                | 1.034                                     | 0.275       |
| IPI00402104.5     | 15 kDa protein                                           | 2                     | 1.010                | 0.760                | 1.333                | 1.034                                     | 0.287       |
| IPI00298558.2     | Programmed cell death protein 10                         | 7                     | 0.893                |                      | 1.176                | 1.035                                     | 0.201       |
| IPI00003815.1     | Rho GDP-dissociation inhibitor 1                         | 3                     | 0.813                | 0.940                | 1.351                | 1.035                                     | 0.281       |
| IPI00169383.2     | Phosphoglycerate kinase 1                                | 7                     | 0.893                | 0.880                | 1.333                | 1.035                                     | 0.258       |
| IPI00291006.1     | Malate dehydrogenase, mitochondrial precursor            | 4                     | 0.885                | 0.870                | 1.351                | 1.035                                     | 0.274       |
| IPI00218493.6     | Hypoxanthine-guanine phosphoribosyltransferase           | 3                     | 1.042                | 0.800                | 1.266                | 1.036                                     | 0.233       |
| IPI00220834.7     | ATP-dependent DNA helicase 2 subunit 2                   | 2                     | 1.075                | 1.000                | 1.033                | 1.036                                     | 0.038       |
| IPI00178083.2     | 29 kDa protein                                           | 4                     | 0.847                | 0.910                | 1.351                | 1.036                                     | 0.275       |
| IPI00013917.1     | 40S ribosomal protein S12                                | 2                     | 1.064                |                      | 1.010                | 1.037                                     | 0.038       |
| IPI00013234.2     | IARS protein                                             | 4                     | 0.704                |                      | 1.370                | 1.037                                     | 0.471       |
| IPI00021290.4     | ATP-citrate synthase                                     | 2                     | 1.124                | 0.740                | 1.250                | 1.038                                     | 0.266       |
| IPI00646917.1     | Cleavage and polyadenylation specificity factor 5        | 4                     | 0.980                | 1.200                | 0.934                | 1.038                                     | 0.142       |
| IPI00293026.5     | Elongation factor Tu GTP binding domain containing 1     | 1                     | 1.038                |                      |                      | 1.038                                     |             |
| IPI00024989.7     | Protein-L-isoaspartate (D-aspartate) O-methyltransferase | 4                     | 1.111                | 0.830                | 1.176                | 1.039                                     | 0.184       |
| IPI00006510.1     | Tubulin beta-1 chain                                     | 3                     | 1.111                | 0.830                | 1.176                | 1.039                                     | 0.184       |
| IPI00395887.4     | Thioredoxin domain-containing protein 1 precursor        | 3                     | 1.020                | 1.150                | 0.949                | 1.040                                     | 0.102       |

| <b>IPI Number</b> | <b>Protein Name</b>                                                    | <b>Peptide number</b> | <b>Forward Set 1</b> | <b>Forward Set 2</b> | <b>Reverse Set 3</b> | <b>Average Ratio (Treated /Untreated)</b> | <b>S.D.</b> |
|-------------------|------------------------------------------------------------------------|-----------------------|----------------------|----------------------|----------------------|-------------------------------------------|-------------|
| IPI00026268.2     | Guanine nucleotide-binding protein G(I)/G(S)/G(T) beta subunit 1       | 2                     |                      | 1.040                |                      | 1.040                                     |             |
| IPI00017672.4     | Hypothetical protein FLJ25678                                          | 3                     | 0.917                |                      | 1.163                | 1.040                                     | 0.173       |
| IPI00219525.9     | 6-phosphogluconate dehydrogenase, decarboxylating                      | 4                     | 0.813                | 0.900                | 1.408                | 1.040                                     | 0.322       |
| IPI00409671.1     | DEAD box polypeptide 42 protein                                        | 2                     |                      | 1.060                | 1.021                | 1.041                                     | 0.028       |
| IPI00030179.3     | 60S ribosomal protein L7                                               | 3                     | 0.870                | 1.090                | 1.163                | 1.041                                     | 0.153       |
| IPI00007402.2     | Importin-7                                                             | 2                     | 1.000                | 1.022                | 1.102                | 1.041                                     | 0.054       |
| IPI00218693.7     | Adenine phosphoribosyltransferase                                      | 3                     | 1.020                | 0.790                | 1.316                | 1.042                                     | 0.264       |
| IPI00030296.5     | BM-010                                                                 | 2                     | 1.064                | 1.021                |                      | 1.042                                     | 0.030       |
| IPI00000230.5     | tropomyosin 1 alpha chain isoform 2                                    | 3                     | 0.877                | 0.900                | 1.351                | 1.043                                     | 0.267       |
| IPI00170979.1     | Splice Isoform 2 of Ena/VASP-like protein                              | 1                     | 0.658                |                      | 1.429                | 1.043                                     | 0.545       |
| IPI00016786.1     | Splice Isoform 2 of Cell division control protein 42 homolog precursor | 6                     | 0.735                |                      | 1.351                | 1.043                                     | 0.436       |
| IPI00182293.5     | Guanylate kinase                                                       | 5                     | 1.111                |                      | 0.976                | 1.044                                     | 0.096       |
| IPI00217223.1     | Multifunctional protein ADE2                                           | 4                     | 1.176                | 0.780                | 1.176                | 1.044                                     | 0.229       |
| IPI00015029.1     | Prostaglandin E synthase 3                                             | 2                     | 1.031                | 0.820                | 1.282                | 1.044                                     | 0.231       |
| IPI00021327.3     | Splice Isoform 1 of Growth factor receptor-bound protein 2             | 3                     | 0.952                |                      | 1.136                | 1.044                                     | 0.130       |
| IPI00221222.6     | Activated RNA polymerase II transcriptional coactivator p15            | 3                     | 0.935                | 0.830                | 1.370                | 1.045                                     | 0.286       |
| IPI00013485.3     | 40S ribosomal protein S2                                               | 3                     | 0.746                | 0.850                | 1.538                | 1.045                                     | 0.431       |
| IPI00011454.1     | Splice Isoform 2 of Neutral alpha-glucosidase AB precursor             | 5                     | 0.893                | 1.040                | 1.205                | 1.046                                     | 0.156       |

| <b>IPI Number</b> | <b>Protein Name</b>                                                                                  | <b>Peptide number</b> | <b>Forward Set 1</b> | <b>Forward Set 2</b> | <b>Reverse Set 3</b> | <b>Average Ratio (Treated /Untreated)</b> | <b>S.D.</b> |
|-------------------|------------------------------------------------------------------------------------------------------|-----------------------|----------------------|----------------------|----------------------|-------------------------------------------|-------------|
| IPI00296913.1     | ADP-sugar pyrophosphatase                                                                            | 4                     | 0.909                | 0.840                | 1.389                | 1.046                                     | 0.299       |
| IPI00219483.1     | Splice Isoform 2 of U1 small nuclear ribonucleoprotein 70 kDa                                        | 2                     | 0.952                | 1.140                |                      | 1.046                                     | 0.133       |
| IPI00329633.5     | Threonyl-tRNA synthetase, cytoplasmic                                                                | 2                     | 0.980                | 1.112                |                      | 1.046                                     | 0.093       |
| IPI00028414.3     | Glia maturation factor gamma                                                                         | 3                     | 0.990                | 0.720                | 1.429                | 1.046                                     | 0.358       |
| IPI00397431.3     | PREDICTED: similar to monoacylglycerol O-acyltransferase 2                                           | 2                     | 0.943                | 0.930                | 1.266                | 1.046                                     | 0.190       |
| IPI00220365.4     | eukaryotic translation initiation factor 4 gamma, 1 isoform 4                                        | 5                     | 1.087                | 1.030                | 1.023                | 1.047                                     | 0.035       |
| IPI00026546.1     | Platelet-activating factor acetylhydrolase IB beta subunit                                           | 2                     | 0.909                | 0.880                | 1.351                | 1.047                                     | 0.264       |
| IPI00240909.1     | PREDICTED: similar to eukaryotic translation initiation factor 3, subunit 5 epsilon, 47kDa isoform 1 | 2                     | 1.053                | 0.970                | 1.118                | 1.047                                     | 0.074       |
| IPI00239077.4     | Histidine triad nucleotide-binding protein 1                                                         | 5                     | 1.020                | 0.770                | 1.351                | 1.047                                     | 0.292       |
| IPI00017855.1     | Aconitate hydratase, mitochondrial precursor                                                         | 5                     | 0.962                | 1.070                | 1.111                | 1.048                                     | 0.077       |
| IPI00479186.4     | pyruvate kinase 3 isoform 1                                                                          | 3                     | 0.877                |                      | 1.220                | 1.048                                     | 0.242       |
| IPI00001960.3     | Chloride intracellular channel protein 4                                                             | 3                     | 1.022                |                      | 1.075                | 1.049                                     | 0.038       |
| IPI00018208.1     | osmosis responsive factor                                                                            | 2                     | 1.022                |                      | 1.075                | 1.049                                     | 0.038       |
| IPI00219005.2     | FK506-binding protein 4                                                                              | 2                     | 1.075                | 1.022                |                      | 1.049                                     | 0.038       |
| IPI00031521.1     | Activator 1 38 kDa subunit                                                                           | 2                     | 1.000                | 1.103                | 1.043                | 1.049                                     | 0.052       |
| IPI00219067.3     | Glutathione S-transferase Mu 2                                                                       | 2                     | 1.042                |                      | 1.056                | 1.049                                     | 0.010       |
| IPI00026260.1     | Nucleoside diphosphate kinase B                                                                      | 2                     | 1.064                | 0.970                | 1.113                | 1.049                                     | 0.073       |
| IPI00219512.1     | Splice Isoform 2 of Ubiquitin                                                                        | 2                     | 1.032                | 0.850                | 1.266                | 1.049                                     | 0.208       |

| <b>IPI Number</b> | <b>Protein Name</b>                                                                       | <b>Peptide number</b> | <b>Forward Set 1</b> | <b>Forward Set 2</b> | <b>Reverse Set 3</b> | <b>Average Ratio (Treated /Untreated)</b> | <b>S.D.</b> |
|-------------------|-------------------------------------------------------------------------------------------|-----------------------|----------------------|----------------------|----------------------|-------------------------------------------|-------------|
|                   | carboxyl-terminal hydrolase isozyme L5                                                    |                       |                      |                      |                      |                                           |             |
| IPI00013415.1     | 40S ribosomal protein S7                                                                  | 3                     | 0.877                | 0.920                | 1.351                | 1.050                                     | 0.262       |
| IPI00021439.1     | Actin, cytoplasmic 1                                                                      | 3                     | 0.893                | 0.940                | 1.316                | 1.050                                     | 0.232       |
| IPI00018206.3     | Aspartate aminotransferase, mitochondrial precursor                                       | 4                     | 0.962                | 1.060                | 1.129                | 1.050                                     | 0.084       |
| IPI00550746.4     | Nuclear migration protein nudC                                                            | 3                     | 1.042                | 1.020                | 1.089                | 1.050                                     | 0.035       |
| IPI00011457.1     | WUGSC:H_RG054D04.1 protein                                                                | 3                     | 0.885                | 1.080                | 1.187                | 1.051                                     | 0.153       |
| IPI00215914.4     | ADP-ribosylation factor 1                                                                 | 2                     | 0.952                |                      | 1.149                | 1.051                                     | 0.139       |
| IPI00302927.5     | T-complex protein 1 subunit delta                                                         | 2                     | 0.962                | 0.840                | 1.351                | 1.051                                     | 0.267       |
| IPI00167198.6     | Splice Isoform 2 of U4/U6 small nuclear ribonucleoprotein Prp31                           | 2                     | 1.099                | 1.043                | 1.012                | 1.051                                     | 0.044       |
| IPI00218323.2     | Tumor protein D52                                                                         | 4                     | 0.935                | 0.850                | 1.370                | 1.051                                     | 0.279       |
| IPI00106668.4     | Splice Isoform A of Mannose-6-phosphate receptor-binding protein 1                        | 3                     | 0.855                | 0.830                | 1.471                | 1.052                                     | 0.363       |
| IPI00221106.5     | splicing factor 3B subunit 2                                                              | 4                     | 1.075                |                      | 1.029                | 1.052                                     | 0.033       |
| IPI00383071.1     | RcTPI1 (Fragment)                                                                         | 4                     | 0.926                | 0.860                | 1.370                | 1.052                                     | 0.277       |
| IPI00012535.1     | DnaJ homolog subfamily A member 1                                                         | 3                     | 0.826                | 0.860                | 1.471                | 1.052                                     | 0.363       |
| IPI00030702.1     | Splice Isoform 1 of Isocitrate dehydrogenase [NAD] subunit alpha, mitochondrial precursor | 2                     | 0.962                | 0.880                | 1.316                | 1.052                                     | 0.232       |
| IPI00009301.1     | Splice Isoform 1 of COP9 signalosome complex subunit 7b                                   | 3                     | 0.885                | 0.710                | 1.563                | 1.052                                     | 0.450       |
| IPI00219018.6     | Glyceraldehyde-3-phosphate dehydrogenase                                                  | 3                     | 0.917                | 0.890                | 1.351                | 1.053                                     | 0.259       |
| IPI00180675.4     | Tubulin alpha-3 chain                                                                     | 2                     | 0.941                | 1.031                | 1.189                | 1.054                                     | 0.126       |
| IPI00018768.1     | Translin                                                                                  | 3                     | 0.962                | 0.850                | 1.351                | 1.054                                     | 0.263       |

| <b>IPI Number</b> | <b>Protein Name</b>                                        | <b>Peptide number</b> | <b>Forward Set 1</b> | <b>Forward Set 2</b> | <b>Reverse Set 3</b> | <b>Average Ratio (Treated /Untreated)</b> | <b>S.D.</b> |
|-------------------|------------------------------------------------------------|-----------------------|----------------------|----------------------|----------------------|-------------------------------------------|-------------|
| IPI00299904.3     | Splice Isoform 1 of DNA replication licensing factor MCM7  | 5                     | 1.010                | 0.820                | 1.333                | 1.054                                     | 0.260       |
| IPI00025447.6     | EEF1A1 protein                                             | 4                     | 0.971                | 0.860                | 1.333                | 1.055                                     | 0.248       |
| IPI00019912.2     | Peroxisomal multifunctional enzyme type 2                  | 2                     | 1.099                | 1.011                |                      | 1.055                                     | 0.062       |
| IPI00030243.1     | Splice Isoform 1 of Proteasome activator complex subunit 3 | 4                     | 0.885                | 1.211                | 1.070                | 1.055                                     | 0.164       |
| IPI00018349.5     | DNA replication licensing factor MCM4                      | 2                     | 0.990                | 0.910                | 1.266                | 1.055                                     | 0.187       |
| IPI00010105.1     | Eukaryotic translation initiation factor 6                 | 4                     | 1.250                | 0.932                | 0.984                | 1.055                                     | 0.171       |
| IPI00029485.2     | Splice Isoform p150 of Dynactin-1                          | 3                     | 0.775                | 1.023                | 1.370                | 1.056                                     | 0.299       |
| IPI00019600.2     | Ubiquitin-conjugating enzyme E2 variant 2                  | 2                     | 1.010                | 1.102                |                      | 1.056                                     | 0.065       |
| IPI00029750.1     | Splice Isoform 1 of 40S ribosomal protein S24              | 5                     | 1.053                | 1.090                | 1.027                | 1.057                                     | 0.032       |
| IPI00027626.2     | T-complex protein 1 subunit zeta                           | 4                     | 0.917                | 0.920                | 1.333                | 1.057                                     | 0.239       |
| IPI00024719.1     | Histone acetyltransferase type B catalytic subunit         | 2                     | 1.031                | 1.021                | 1.123                | 1.058                                     | 0.056       |
| IPI00169280.2     | Aflatoxin B1 aldehyde reductase member 4 (Fragment)        | 2                     | 1.111                | 1.021                | 1.043                | 1.058                                     | 0.047       |
| IPI00219446.4     | Phosphatidylethanolamine-binding protein                   | 4                     | 1.389                | 0.850                | 0.938                | 1.059                                     | 0.289       |
| IPI00012750.3     | 40S ribosomal protein S25                                  | 2                     | 0.926                | 0.970                | 1.282                | 1.059                                     | 0.194       |
| IPI00030275.5     | Heat shock protein 75 kDa, mitochondrial precursor         | 2                     | 1.087                |                      | 1.032                | 1.059                                     | 0.039       |
| IPI00010080.2     | Serine/threonine-protein kinase OSR1                       | 2                     | 0.980                | 1.032                | 1.167                | 1.060                                     | 0.096       |
| IPI00102821.3     | PACAP protein                                              | 3                     | 1.010                | 0.920                | 1.250                | 1.060                                     | 0.171       |
| IPI00303318.2     | Protein FAM49B                                             | 3                     | 0.787                |                      | 1.333                | 1.060                                     | 0.386       |
| IPI00027497.4     | Glucose-6-phosphate isomerase                              | 5                     | 0.962                | 0.870                | 1.351                | 1.061                                     | 0.256       |

| <b>IPI Number</b> | <b>Protein Name</b>                                           | <b>Peptide number</b> | <b>Forward Set 1</b> | <b>Forward Set 2</b> | <b>Reverse Set 3</b> | <b>Average Ratio (Treated /Untreated)</b> | <b>S.D.</b> |
|-------------------|---------------------------------------------------------------|-----------------------|----------------------|----------------------|----------------------|-------------------------------------------|-------------|
| IPI00030154.1     | Proteasome activator complex subunit 1                        | 5                     | 0.926                | 0.830                | 1.429                | 1.061                                     | 0.321       |
| IPI00290770.3     | chaperonin containing TCP1, subunit 3 isoform b               | 7                     | 0.926                | 0.890                | 1.370                | 1.062                                     | 0.267       |
| IPI00219740.3     | Splice Isoform 2 of DNA replication licensing factor MCM7     | 2                     | 1.136                | 0.800                | 1.250                | 1.062                                     | 0.234       |
| IPI00289334.1     | Splice Isoform 1 of Filamin-B                                 | 6                     | 1.064                | 0.790                | 1.333                | 1.062                                     | 0.272       |
| IPI00006723.4     | WD-repeat protein 57                                          | 2                     | 1.075                |                      | 1.051                | 1.063                                     | 0.017       |
| IPI00257508.4     | Dihydropyrimidinase-related protein 2                         | 2                     | 0.990                |                      | 1.136                | 1.063                                     | 0.103       |
| IPI00021831.1     | cAMP-dependent protein kinase type I-alpha regulatory subunit | 2                     | 1.149                | 0.930                | 1.111                | 1.064                                     | 0.117       |
| IPI00413324.5     | 60S ribosomal protein L17                                     | 3                     | 1.205                | 1.107                | 0.879                | 1.064                                     | 0.167       |
| IPI00010865.1     | Casein kinase II subunit beta                                 | 2                     | 1.020                | 0.820                | 1.351                | 1.064                                     | 0.268       |
| IPI00219757.12    | Glutathione S-transferase P                                   | 4                     | 0.943                | 0.860                | 1.389                | 1.064                                     | 0.284       |
| IPI00183526.5     | NCL protein                                                   | 4                     | 1.064                | 0.990                | 1.138                | 1.064                                     | 0.074       |
| IPI00008603.1     | Actin, aortic smooth muscle                                   | 5                     | 0.833                | 0.910                | 1.449                | 1.064                                     | 0.336       |
| IPI00013808.1     | Alpha-actinin-4                                               | 5                     | 0.847                | 0.830                | 1.515                | 1.064                                     | 0.391       |
| IPI00424869.1     | GTP-GDP dissociation stimulator 1 isoform A                   | 2                     | 0.813                |                      | 1.316                | 1.064                                     | 0.356       |
| IPI00024157.1     | FK506-binding protein 3                                       | 3                     | 1.031                | 1.100                | 1.063                | 1.064                                     | 0.035       |
| IPI00026302.3     | 60S ribosomal protein L31                                     | 2                     | 0.833                | 0.890                | 1.471                | 1.065                                     | 0.353       |
| IPI00550689.3     | HSPC117 protein                                               | 2                     | 0.893                | 1.140                | 1.163                | 1.065                                     | 0.150       |
| IPI00246058.5     | PDCD6IP protein                                               | 2                     | 1.042                | 1.067                | 1.087                | 1.065                                     | 0.023       |
| IPI00398958.1     | PREDICTED: similar to 40S ribosomal protein SA                | 3                     | 0.917                | 0.930                | 1.351                | 1.066                                     | 0.247       |
| IPI00152326.3     | glutathione S-transferase M1 isoform 2                        | 4                     | 0.980                | 1.092                | 1.127                | 1.066                                     | 0.077       |

| <b>IPI Number</b> | <b>Protein Name</b>                                                    | <b>Peptide number</b> | <b>Forward Set 1</b> | <b>Forward Set 2</b> | <b>Reverse Set 3</b> | <b>Average Ratio (Treated /Untreated)</b> | <b>S.D.</b> |
|-------------------|------------------------------------------------------------------------|-----------------------|----------------------|----------------------|----------------------|-------------------------------------------|-------------|
| IPI00414860.5     | 60S ribosomal protein L37a                                             | 2                     | 1.087                | 0.912                | 1.201                | 1.067                                     | 0.146       |
| IPI00219575.5     | Bleomycin hydrolase                                                    | 2                     | 0.971                |                      | 1.163                | 1.067                                     | 0.136       |
| IPI00031681.1     | Cell division protein kinase 2                                         | 3                     | 1.042                |                      | 1.092                | 1.067                                     | 0.036       |
| IPI00329629.6     | DnaJ homolog subfamily C member 7                                      | 2                     | 1.023                |                      | 1.111                | 1.067                                     | 0.062       |
| IPI00217030.9     | 40S ribosomal protein S4, X isoform                                    | 2                     | 0.952                | 0.860                | 1.389                | 1.067                                     | 0.282       |
| IPI00464952.2     | Splicing factor arginine/serine-rich 11                                | 6                     | 0.909                | 1.080                | 1.215                | 1.068                                     | 0.153       |
| IPI00008770.1     | glutathione S-transferase M4 isoform 1                                 | 3                     | 0.917                |                      | 1.220                | 1.068                                     | 0.214       |
| IPI00291510.3     | Inosine-5'-monophosphate dehydrogenase 2                               | 2                     | 1.124                | 0.900                | 1.182                | 1.069                                     | 0.149       |
| IPI00449906.3     | Splice Isoform 1 of Rho guanine nucleotide exchange factor 7           | 2                     | 0.730                |                      | 1.408                | 1.069                                     | 0.480       |
| IPI00004534.3     | Phosphoribosylformylglycinamidase synthase                             | 4                     | 1.053                |                      | 1.087                | 1.070                                     | 0.024       |
| IPI00014238.2     | Lysyl-tRNA synthetase                                                  | 3                     | 1.010                | 0.850                | 1.351                | 1.070                                     | 0.256       |
| IPI00010860.1     | Splice Isoform p27-L of 26S proteasome non-ATPase regulatory subunit 9 | 2                     | 0.971                | 0.960                | 1.282                | 1.071                                     | 0.183       |
| IPI00220644.7     | Splice Isoform M1 of Pyruvate kinase isozymes M1/M2                    | 5                     | 1.031                | 0.900                | 1.282                | 1.071                                     | 0.194       |
| IPI00297084.7     | Dolichyl-diphosphooligosaccharide-protein glycosyltransferase          | 2                     | 0.990                | 1.122                | 1.101                | 1.071                                     | 0.071       |
| IPI00025244.1     | Zinc-finger protein ZPR1                                               | 2                     | 1.000                | 1.102                | 1.114                | 1.072                                     | 0.063       |
| IPI00007321.1     | Splice Isoform 1 of Acyl-protein thioesterase 1                        | 2                     | 1.042                |                      | 1.104                | 1.073                                     | 0.044       |
| IPI00011654.2     | Tubulin beta-2 chain                                                   | 3                     | 1.149                | 0.820                | 1.250                | 1.073                                     | 0.225       |
| IPI00465439.4     | Fructose-bisphosphate aldolase A                                       | 2                     | 1.010                | 0.840                | 1.370                | 1.073                                     | 0.271       |
| IPI00031523.3     | Heat shock protein 86 (Fragment)                                       | 3                     | 0.862                | 0.950                | 1.408                | 1.074                                     | 0.293       |
| IPI00016610.2     | Poly(rC)-binding protein 1                                             | 4                     | 1.042                | 0.930                | 1.250                | 1.074                                     | 0.162       |

| <b>IPI Number</b> | <b>Protein Name</b>                                         | <b>Peptide number</b> | <b>Forward Set 1</b> | <b>Forward Set 2</b> | <b>Reverse Set 3</b> | <b>Average Ratio (Treated /Untreated)</b> | <b>S.D.</b> |
|-------------------|-------------------------------------------------------------|-----------------------|----------------------|----------------------|----------------------|-------------------------------------------|-------------|
| IPI00017469.1     | Sepiapterin reductase                                       | 2                     | 0.943                |                      | 1.205                | 1.074                                     | 0.185       |
| IPI00016346.1     | Proline synthetase co-transcribed bacterial homolog protein | 3                     | 0.833                |                      | 1.316                | 1.075                                     | 0.341       |
| IPI00024067.3     | clathrin heavy chain 1                                      | 2                     | 0.917                | 0.900                | 1.408                | 1.075                                     | 0.289       |
| IPI00007068.1     | actin-related protein 3-beta isoform 1                      | 2                     | 0.901                |                      | 1.250                | 1.075                                     | 0.247       |
| IPI00007750.1     | Tubulin alpha-1 chain                                       | 2                     | 1.163                | 0.830                | 1.235                | 1.076                                     | 0.216       |
| IPI00026513.5     | ribose 5-phosphate isomerase A                              | 2                     | 0.870                |                      | 1.282                | 1.076                                     | 0.292       |
| IPI00015550.6     | Prothymosin alpha                                           | 3                     | 0.990                |                      | 1.163                | 1.076                                     | 0.122       |
| IPI00148061.3     | L-lactate dehydrogenase A-like 6A                           | 2                     | 1.176                | 0.820                | 1.235                | 1.077                                     | 0.224       |
| IPI00021700.3     | Proliferating cell nuclear antigen                          | 4                     | 1.000                | 0.950                | 1.282                | 1.077                                     | 0.179       |
| IPI00145540.7     | PREDICTED: similar to tropomyosin 3 isoform 2               | 2                     | 0.840                |                      | 1.316                | 1.078                                     | 0.336       |
| IPI00550363.2     | Transgelin-2                                                | 4                     | 1.099                | 0.870                | 1.266                | 1.078                                     | 0.199       |
| IPI00022774.2     | Transitional endoplasmic reticulum ATPase                   | 2                     | 1.042                | 0.860                | 1.333                | 1.078                                     | 0.239       |
| IPI00013769.1     | Alpha-enolase, lung specific                                | 4                     | 1.000                | 0.940                | 1.299                | 1.080                                     | 0.192       |
| IPI00024466.1     | UDP-glucose ceramide glucosyltransferase-like 1 isoform 1   | 5                     | 0.826                |                      | 1.333                | 1.080                                     | 0.358       |
| IPI00550488.2     | TALDO1 protein                                              | 4                     | 0.943                | 0.890                | 1.408                | 1.081                                     | 0.285       |
| IPI00220362.4     | 10 kDa heat shock protein, mitochondrial                    | 4                     | 1.064                | 1.230                | 0.949                | 1.081                                     | 0.141       |
| IPI00031517.1     | DNA replication licensing factor MCM6                       | 4                     | 0.943                | 0.930                | 1.370                | 1.081                                     | 0.250       |
| IPI00289499.3     | Bifunctional purine biosynthesis protein PURH               | 2                     | 1.020                | 0.890                | 1.333                | 1.081                                     | 0.228       |
| IPI00003269.1     | hypothetical protein LOC345651                              | 2                     | 0.926                | 0.930                | 1.389                | 1.082                                     | 0.266       |
| IPI00005087.1     | Tropomodulin-3                                              | 2                     | 1.102                |                      | 1.064                | 1.083                                     | 0.027       |
| IPI00008433.3     | 40S ribosomal protein S5                                    | 3                     | 1.299                | 0.920                | 1.031                | 1.083                                     | 0.195       |



| <b>IPI Number</b> | <b>Protein Name</b>                                      | <b>Peptide number</b> | <b>Forward Set 1</b> | <b>Forward Set 2</b> | <b>Reverse Set 3</b> | <b>Average Ratio (Treated /Untreated)</b> | <b>S.D.</b> |
|-------------------|----------------------------------------------------------|-----------------------|----------------------|----------------------|----------------------|-------------------------------------------|-------------|
| IPI00012493.1     | 40S ribosomal protein S20                                | 3                     | 0.971                | 0.890                | 1.389                | 1.083                                     | 0.268       |
| IPI00334775.5     | Hypothetical protein DKFZp761K0511                       | 2                     | 0.901                | 0.960                | 1.389                | 1.083                                     | 0.266       |
| IPI00029079.5     | GMP synthase                                             | 3                     | 1.124                | 0.990                | 1.136                | 1.083                                     | 0.081       |
| IPI00328319.7     | Histone-binding protein RBBP4                            | 2                     | 0.962                | 0.990                | 1.299                | 1.083                                     | 0.187       |
| IPI00395865.4     | Histone-binding protein RBBP7                            | 4                     | 1.020                | 1.054                | 1.176                | 1.084                                     | 0.082       |
| IPI00218570.5     | Phosphoglycerate mutase 2                                | 4                     | 0.909                | 1.060                | 1.282                | 1.084                                     | 0.188       |
| IPI00169430.1     | Spermatid perinuclear RNA-binding protein                | 2                     | 1.075                | 1.121                | 1.055                | 1.084                                     | 0.034       |
| IPI00005978.7     | Splicing factor, arginine/serine-rich 2                  | 3                     |                      | 1.030                | 1.138                | 1.084                                     | 0.077       |
| IPI00328170.8     | Mannosyl-oligosaccharide glucosidase                     | 2                     | 1.064                | 1.105                |                      | 1.084                                     | 0.029       |
| IPI00073603.3     | Peptidyl-prolyl cis-trans isomerase                      | 2                     | 0.901                | 0.860                | 1.493                | 1.084                                     | 0.354       |
| IPI00419237.2     | leucine aminopeptidase                                   | 4                     | 1.031                | 0.890                | 1.333                | 1.085                                     | 0.227       |
| IPI00217236.3     | Tubulin-specific chaperone A                             | 3                     | 0.962                | 1.230                | 1.064                | 1.085                                     | 0.135       |
| IPI00100106.1     | resistance to inhibitors of cholinesterase 8 homolog A   | 4                     |                      | 1.021                | 1.149                | 1.085                                     | 0.091       |
| IPI00008552.6     | Thioredoxin-like protein 2                               | 2                     | 1.064                | 1.108                |                      | 1.086                                     | 0.031       |
| IPI00394699.1     | Ribosomal protein homolog PD-1                           | 3                     | 1.087                | 0.950                | 1.222                | 1.086                                     | 0.136       |
| IPI00643920.2     | Transketolase                                            | 2                     | 1.020                | 0.850                | 1.389                | 1.086                                     | 0.275       |
| IPI00306960.3     | Asparaginyl-tRNA synthetase, cytoplasmic                 | 3                     | 1.136                |                      | 1.037                | 1.087                                     | 0.070       |
| IPI00011107.2     | Isocitrate dehydrogenase [NADP], mitochondrial precursor | 2                     | 1.266                | 0.790                | 1.205                | 1.087                                     | 0.259       |
| IPI00216153.6     | 40S ribosomal protein S15                                | 2                     | 1.064                | 0.900                | 1.299                | 1.088                                     | 0.200       |
| IPI00030706.1     | Activator of 90 kDa heat shock protein ATPase homolog 1  | 3                     | 1.205                | 0.840                | 1.220                | 1.088                                     | 0.215       |
| IPI00013894.1     | Stress-induced-phosphoprotein 1                          | 5                     | 0.990                | 0.890                | 1.389                | 1.090                                     | 0.264       |

| <b>IPI Number</b> | <b>Protein Name</b>                                                                       | <b>Peptide number</b> | <b>Forward Set 1</b> | <b>Forward Set 2</b> | <b>Reverse Set 3</b> | <b>Average Ratio (Treated /Untreated)</b> | <b>S.D.</b> |
|-------------------|-------------------------------------------------------------------------------------------|-----------------------|----------------------|----------------------|----------------------|-------------------------------------------|-------------|
| IPI00376798.3     | ribosomal protein L11<br>Splice Isoform 1 of                                              | 3                     | 0.806                | 0.850                | 1.613                | 1.090                                     | 0.454       |
| IPI00217952.6     | Glucosamine--fructose-6-phosphate<br>aminotransferase [isomerizing] 1                     | 3                     | 1.042                |                      | 1.138                | 1.090                                     | 0.068       |
| IPI00293126.1     | Tubulin-specific chaperone B                                                              | 3                     | 1.064                | 0.780                | 1.429                | 1.091                                     | 0.325       |
| IPI00101968.3     | Splice Isoform 3 of Drebrin-like protein                                                  | 2                     | 1.022                | 1.102                | 1.149                | 1.091                                     | 0.064       |
| IPI00385480.4     | Caskin-1                                                                                  | 2                     |                      | 1.140                | 1.043                | 1.092                                     | 0.069       |
| IPI00220480.7     | 60 kDa protein                                                                            | 3                     | 1.235                | 0.950                |                      | 1.092                                     | 0.201       |
| IPI00221091.8     | 40S ribosomal protein S15a                                                                | 6                     | 0.735                |                      | 1.449                | 1.092                                     | 0.505       |
| IPI00018465.1     | T-complex protein 1 subunit eta                                                           | 2                     | 0.885                | 0.900                | 1.493                | 1.092                                     | 0.347       |
| IPI00012011.5     | Cofilin-1<br>CDNA FLJ34068 fis, clone FCBBF3001918,<br>highly similar to SERINE/THREONINE | 6                     | 0.885                | 0.880                | 1.515                | 1.093                                     | 0.365       |
| IPI00168184.7     | PROTEIN PHOSPHATASE 2A, 65 kDa<br>REGULATORY SUBUNIT A, ALPHA<br>ISOFORM                  | 2                     | 1.099                | 0.830                | 1.351                | 1.093                                     | 0.261       |
| IPI00179291.4     | Cytosolic aminopeptidase P                                                                | 2                     | 0.990                | 1.270                | 1.022                | 1.094                                     | 0.153       |
| IPI00096066.2     | Succinyl-CoA ligase [GDP-forming]<br>beta-chain, mitochondrial precursor                  | 2                     | 0.690                | 1.030                | 1.563                | 1.094                                     | 0.440       |
| IPI00012772.7     | 60S ribosomal protein L8                                                                  | 4                     | 0.813                | 1.120                | 1.351                | 1.095                                     | 0.270       |
| IPI00219097.3     | High mobility group protein B2                                                            | 4                     | 1.000                |                      | 1.190                | 1.095                                     | 0.135       |
| IPI00025277.5     | Programmed cell death protein 6                                                           | 3                     | 0.893                |                      | 1.299                | 1.096                                     | 0.287       |
| IPI00296432.1     | Splice Isoform 1 of IWS1-like protein                                                     | 2                     | 1.087                | 1.106                |                      | 1.096                                     | 0.013       |
| IPI00024911.1     | Endoplasmic reticulum protein ERp29                                                       | 3                     | 0.781                | 1.080                | 1.429                | 1.097                                     | 0.324       |

| <b>IPI Number</b> | <b>Protein Name</b>                                                          | <b>Peptide number</b> | <b>Forward Set 1</b> | <b>Forward Set 2</b> | <b>Reverse Set 3</b> | <b>Average Ratio (Treated /Untreated)</b> | <b>S.D.</b> |
|-------------------|------------------------------------------------------------------------------|-----------------------|----------------------|----------------------|----------------------|-------------------------------------------|-------------|
|                   | precursor                                                                    |                       |                      |                      |                      |                                           |             |
| IPI00014198.2     | Exosome complex exonuclease RRP42                                            | 2                     | 1.087                | 1.107                |                      | 1.097                                     | 0.014       |
| IPI00009943.2     | Tumor protein, translationally-controlled 1                                  | 3                     | 1.163                | 1.032                |                      | 1.097                                     | 0.092       |
| IPI00012585.1     | Beta-hexosaminidase beta chain precursor                                     | 8                     | 0.952                | 1.080                | 1.266                | 1.099                                     | 0.158       |
| IPI00021266.1     | 60S ribosomal protein L23a                                                   | 5                     | 1.220                | 0.980                |                      | 1.100                                     | 0.169       |
| IPI00643041.2     | GTP-binding nuclear protein Ran                                              | 4                     | 1.031                | 0.880                | 1.389                | 1.100                                     | 0.261       |
| IPI00008438.1     | 40S ribosomal protein S10                                                    | 2                     | 0.885                |                      | 1.316                | 1.100                                     | 0.305       |
| IPI00007797.2     | Fatty acid-binding protein, epidermal                                        | 3                     | 1.053                | 0.950                | 1.299                | 1.100                                     | 0.179       |
| IPI00003856.1     | Vacuolar ATP synthase subunit E                                              | 3                     | 0.893                | 0.960                | 1.449                | 1.101                                     | 0.304       |
| IPI00000690.1     | Splice Isoform 1 of Programmed cell death protein 8, mitochondrial precursor | 3                     | 1.099                | 1.103                |                      | 1.101                                     | 0.003       |
| IPI00010810.1     | Electron transfer flavoprotein alpha-subunit, mitochondrial precursor        | 4                     | 0.833                |                      | 1.370                | 1.102                                     | 0.379       |
| IPI00002821.3     | 60S ribosomal protein L14                                                    | 3                     | 0.917                | 0.960                | 1.429                | 1.102                                     | 0.284       |
| IPI00216298.5     | Thioredoxin                                                                  | 1                     | 1.111                | 1.093                |                      | 1.102                                     | 0.013       |
| IPI00220038.1     | Splice Isoform B of Arsenite-resistance protein 2                            | 3                     | 0.909                | 1.280                | 1.118                | 1.102                                     | 0.186       |
| IPI00221035.3     | Splice Isoform 1 of Transcription factor BTF3                                | 3                     | 1.043                |                      | 1.163                | 1.103                                     | 0.085       |
| IPI00297779.6     | T-complex protein 1 subunit beta                                             | 9                     | 1.010                | 0.850                | 1.449                | 1.103                                     | 0.310       |
| IPI00154975.3     | DnaJ homolog subfamily C member 9                                            | 2                     | 1.087                | 1.122                |                      | 1.104                                     | 0.025       |
| IPI00411706.1     | Esterase D                                                                   | 3                     | 1.087                |                      | 1.124                | 1.105                                     | 0.026       |
| IPI00419307.2     | alpha isoform of regulatory subunit A, protein phosphatase 2                 | 3                     | 1.020                | 0.980                | 1.316                | 1.105                                     | 0.183       |
| IPI00303882.2     | Splice Isoform B of Mannose-6-phosphate                                      | 3                     | 0.855                | 0.900                | 1.563                | 1.106                                     | 0.396       |

| <b>IPI Number</b> | <b>Protein Name</b>                                                                        | <b>Peptide number</b> | <b>Forward Set 1</b> | <b>Forward Set 2</b> | <b>Reverse Set 3</b> | <b>Average Ratio (Treated /Untreated)</b> | <b>S.D.</b> |
|-------------------|--------------------------------------------------------------------------------------------|-----------------------|----------------------|----------------------|----------------------|-------------------------------------------|-------------|
|                   | receptor-binding protein 1                                                                 |                       |                      |                      |                      |                                           |             |
| IPI00005161.3     | Actin-related protein 2/3 complex subunit 2                                                | 2                     | 1.021                |                      | 1.190                | 1.106                                     | 0.120       |
| IPI00038378.4     | E-1 enzyme                                                                                 | 2                     | 0.962                |                      | 1.250                | 1.106                                     | 0.204       |
| IPI00000874.1     | Peroxiredoxin-1                                                                            | 7                     | 1.136                | 0.900                | 1.282                | 1.106                                     | 0.193       |
| IPI00010320.1     | Chromobox protein homolog 1                                                                | 2                     | 1.022                |                      | 1.190                | 1.106                                     | 0.119       |
| IPI00299571.4     | CDNA FLJ45525 fis, clone BRTHA2026311,<br>highly similar to Protein disulfide isomerase A6 | 5                     | 1.163                | 1.020                | 1.138                | 1.107                                     | 0.076       |
| IPI00016613.2     | CSNK2A1 protein                                                                            | 2                     | 0.990                | 1.000                | 1.333                | 1.108                                     | 0.195       |
| IPI00011416.2     | Delta3,5-delta2,4-dienoyl-CoA isomerase,<br>mitochondrial precursor                        | 2                     | 0.800                | 0.990                | 1.538                | 1.109                                     | 0.383       |
| IPI00386751.2     | Chromosome 6 open reading frame 74                                                         | 2                     | 1.201                | 1.043                | 1.087                | 1.110                                     | 0.082       |
| IPI00291922.2     | Proteasome subunit alpha type 5                                                            | 3                     | 0.962                | 1.150                | 1.220                | 1.110                                     | 0.133       |
| IPI00014718.4     | RcDNAJ9 (Fragment)                                                                         | 3                     | 1.099                | 1.122                |                      | 1.110                                     | 0.016       |
| IPI00607591.1     | RAP1, GTP-GDP dissociation stimulator 1                                                    | 6                     | 1.031                |                      | 1.190                | 1.111                                     | 0.113       |
| IPI00182180.1     | OTU domain-containing protein 6B                                                           | 2                     | 1.190                | 1.032                |                      | 1.111                                     | 0.112       |
| IPI00001890.8     | Coatmer subunit gamma                                                                      | 1                     | 1.124                |                      | 1.102                | 1.113                                     | 0.015       |
| IPI00003881.5     | heterogeneous nuclear ribonucleoprotein F                                                  | 6                     | 0.826                | 1.290                | 1.222                | 1.113                                     | 0.250       |
| IPI00023234.3     | Ubiquitin-like 1-activating enzyme E1B                                                     | 3                     | 0.935                | 0.820                | 1.587                | 1.114                                     | 0.414       |
| IPI00022143.3     | Splice Isoform 1 of Protein FAM62A                                                         | 9                     | 0.820                |                      | 1.408                | 1.114                                     | 0.416       |
| IPI00515040.1     | Chromosome 9 open reading frame 32                                                         | 2                     | 1.092                |                      | 1.136                | 1.114                                     | 0.031       |
| IPI00013871.1     | Ribonucleoside-diphosphate reductase large subunit                                         | 2                     | 1.111                | 1.211                | 1.021                | 1.114                                     | 0.095       |
| IPI00445401.2     | Splice Isoform 2 of HECT, UBA and WWE                                                      | 2                     |                      | 1.093                | 1.136                | 1.115                                     | 0.031       |

| <b>IPI Number</b> | <b>Protein Name</b>                                                                               | <b>Peptide number</b> | <b>Forward Set 1</b> | <b>Forward Set 2</b> | <b>Reverse Set 3</b> | <b>Average Ratio (Treated /Untreated)</b> | <b>S.D.</b> |
|-------------------|---------------------------------------------------------------------------------------------------|-----------------------|----------------------|----------------------|----------------------|-------------------------------------------|-------------|
| IPI00027230.3     | domain-containing protein 1<br>Endoplasmic precursor                                              | 2                     | 0.926                | 1.010                | 1.408                | 1.115                                     | 0.258       |
| IPI00012726.4     | Splice Isoform 1 of Polyadenylate-binding protein 4                                               | 3                     | 1.020                | 1.211                |                      | 1.116                                     | 0.135       |
| IPI00644674.1     | Nucleotide-binding protein 2                                                                      | 3                     |                      | 1.133                | 1.099                | 1.116                                     | 0.024       |
| IPI00465028.6     | Triosephosphate isomerase                                                                         | 3                     | 0.980                | 1.000                | 1.370                | 1.117                                     | 0.219       |
| IPI00171438.2     | Thioredoxin domain-containing protein 5 precursor                                                 | 3                     | 0.980                | 1.040                | 1.333                | 1.118                                     | 0.189       |
| IPI00017726.1     | hydroxyacyl-Coenzyme A dehydrogenase, type II isoform 1                                           | 2                     | 0.885                |                      | 1.351                | 1.118                                     | 0.330       |
| IPI00060650.3     | Splice Isoform 2 of PEST-containing nuclear protein                                               | 4                     | 1.149                |                      | 1.087                | 1.118                                     | 0.044       |
| IPI00294178.1     | Serine/threonine-protein phosphatase 2A 65 kDa regulatory subunit A beta isoform                  | 2                     | 1.000                | 1.122                | 1.235                | 1.119                                     | 0.117       |
| IPI00034049.1     | Splice Isoform 1 of Regulator of nonsense transcripts 1                                           | 3                     | 1.176                |                      | 1.065                | 1.121                                     | 0.079       |
| IPI00013679.1     | Splice Isoform DUT-M of Deoxyuridine 5'-triphosphate nucleotidohydrolase, mitochondrial precursor | 3                     | 1.190                | 0.980                | 1.193                | 1.121                                     | 0.122       |
| IPI00373857.1     | PREDICTED: similar to laminin receptor 1                                                          | 3                     | 1.000                | 0.850                | 1.515                | 1.122                                     | 0.349       |
| IPI00021840.1     | 40S ribosomal protein S6                                                                          | 4                     | 0.833                | 0.970                | 1.563                | 1.122                                     | 0.388       |
| IPI00444262.1     | CDNA FLJ45706 fis, clone FEBRA2028457, highly similar to Nucleolin                                | 5                     | 1.176                | 1.040                | 1.152                | 1.123                                     | 0.073       |
| IPI00012066.1     | poly(rC)-binding protein 2 isoform b                                                              | 5                     | 0.990                | 0.970                | 1.408                | 1.123                                     | 0.248       |

| <b>IPI Number</b> | <b>Protein Name</b>                                               | <b>Peptide number</b> | <b>Forward Set 1</b> | <b>Forward Set 2</b> | <b>Reverse Set 3</b> | <b>Average Ratio (Treated /Untreated)</b> | <b>S.D.</b> |
|-------------------|-------------------------------------------------------------------|-----------------------|----------------------|----------------------|----------------------|-------------------------------------------|-------------|
| IPI00009032.1     | Lupus La protein                                                  | 4                     | 0.870                | 0.860                | 1.639                | 1.123                                     | 0.447       |
| IPI00748920.1     | splicing coactivator subunit SRm300                               | 2                     | 0.806                | 1.000                | 1.563                | 1.123                                     | 0.393       |
| IPI00005792.1     | poly(A) binding protein, nuclear 1                                | 2                     |                      |                      | 1.125                | 1.125                                     |             |
| IPI00016910.1     | Eukaryotic translation initiation factor 3 subunit 8              | 3                     | 0.952                |                      | 1.299                | 1.126                                     | 0.245       |
| IPI00640703.3     | Splice Isoform 1 of Exportin-5                                    | 2                     | 1.042                |                      | 1.210                | 1.126                                     | 0.119       |
| IPI00302850.4     | Small nuclear ribonucleoprotein Sm D1                             | 2                     | 1.136                | 1.192                | 1.049                | 1.126                                     | 0.072       |
| IPI00103483.1     | Negative elongation factor B                                      | 2                     | 1.205                | 1.048                |                      | 1.126                                     | 0.111       |
| IPI00744692.1     | Transaldolase                                                     | 2                     | 0.926                | 0.730                | 1.724                | 1.127                                     | 0.527       |
| IPI00007928.4     | Pre-mRNA-processing-splicing factor 8                             | 2                     | 1.105                | 1.150                |                      | 1.128                                     | 0.032       |
| IPI00024933.3     | 60S ribosomal protein L12                                         | 2                     | 0.787                | 1.080                | 1.515                | 1.128                                     | 0.366       |
| IPI00221093.6     | 40S ribosomal protein S17                                         | 2                     | 0.901                | 0.990                | 1.493                | 1.128                                     | 0.319       |
| IPI00006167.1     | Protein phosphatase 2C isoform gamma                              | 3                     | 1.020                | 0.850                | 1.515                | 1.129                                     | 0.346       |
| IPI00025366.4     | Citrate synthase, mitochondrial precursor                         | 4                     | 1.087                | 1.000                | 1.299                | 1.129                                     | 0.154       |
| IPI00220766.3     | Lactoylglutathione lyase                                          | 3                     | 0.980                | 1.090                | 1.316                | 1.129                                     | 0.171       |
| IPI00003918.5     | 60S ribosomal protein L4                                          | 4                     | 0.917                | 1.080                | 1.389                | 1.129                                     | 0.239       |
| IPI00010415.2     | Splice Isoform 1 of Cytosolic acyl coenzyme A thioester hydrolase | 2                     | 0.971                | 1.102                | 1.316                | 1.130                                     | 0.174       |
| IPI00003519.1     | 116 kDa U5 small nuclear ribonucleoprotein component              | 2                     | 1.136                |                      | 1.123                | 1.130                                     | 0.009       |
| IPI00177728.3     | Cytosolic nonspecific dipeptidase                                 | 4                     | 0.870                | 1.270                | 1.250                | 1.130                                     | 0.226       |
| IPI00013788.1     | HIV TAT specific factor 1                                         | 2                     | 1.266                | 1.092                | 1.032                | 1.130                                     | 0.121       |
| IPI00744630.1     | Splice Isoform 2 of Protein-L-isoaspartate(D-aspartate)           | 2                     | 1.053                | 1.105                | 1.235                | 1.131                                     | 0.094       |

| <b>IPI Number</b> | <b>Protein Name</b>                                                                        | <b>Peptide number</b> | <b>Forward Set 1</b> | <b>Forward Set 2</b> | <b>Reverse Set 3</b> | <b>Average Ratio (Treated /Untreated)</b> | <b>S.D.</b> |
|-------------------|--------------------------------------------------------------------------------------------|-----------------------|----------------------|----------------------|----------------------|-------------------------------------------|-------------|
|                   | O-methyltransferase                                                                        |                       |                      |                      |                      |                                           |             |
| IPI00005202.1     | Membrane-associated progesterone receptor component 2                                      | 2                     | 1.053                | 1.210                |                      | 1.131                                     | 0.111       |
| IPI00329745.4     | 130 kDa leucine-rich protein                                                               | 2                     | 0.893                |                      | 1.370                | 1.131                                     | 0.337       |
| IPI00329389.6     | DNA-binding protein TAXREB107                                                              | 3                     | 0.826                | 1.030                | 1.538                | 1.132                                     | 0.367       |
| IPI00005705.1     | Splice Isoform Gamma-1 of Serine/threonine-protein phosphatase PP1-gamma catalytic subunit | 2                     | 0.935                | 1.211                | 1.250                | 1.132                                     | 0.172       |
| IPI00022881.1     | Splice Isoform 1 of Clathrin heavy chain 2                                                 | 2                     | 1.031                | 0.850                | 1.515                | 1.132                                     | 0.344       |
| IPI00002324.4     | methionine adenosyltransferase II, beta isoform 1                                          | 2                     | 0.855                | 0.980                | 1.563                | 1.132                                     | 0.378       |
| IPI00289535.6     | Mitochondrial-processing peptidase beta subunit, mitochondrial precursor                   | 4                     | 1.111                |                      | 1.155                | 1.133                                     | 0.031       |
| IPI00026271.4     | 40S ribosomal protein S14                                                                  | 3                     | 0.990                | 1.040                | 1.370                | 1.133                                     | 0.206       |
| IPI00219029.2     | Aspartate aminotransferase, cytoplasmic                                                    | 3                     | 0.962                | 1.010                | 1.429                | 1.133                                     | 0.257       |
| IPI00294536.1     | Serine-threonine kinase receptor-associated protein                                        | 2                     | 1.075                | 1.192                |                      | 1.134                                     | 0.083       |
| IPI00301277.1     | Heat shock 70 kDa protein 1L                                                               | 4                     | 1.163                | 1.202                | 1.037                | 1.134                                     | 0.086       |
| IPI00442895.2     | Splice Isoform 3 of UBX domain-containing protein 7                                        | 1                     |                      | 1.092                | 1.176                | 1.134                                     | 0.060       |
| IPI00329200.6     | Importin beta-3                                                                            | 2                     | 1.075                | 0.920                | 1.408                | 1.135                                     | 0.250       |
| IPI00027270.1     | 60S ribosomal protein L26                                                                  | 2                     |                      | 1.050                | 1.220                | 1.135                                     | 0.120       |
| IPI00012795.3     | Eukaryotic translation initiation factor 3 subunit 2                                       | 2                     | 0.862                |                      | 1.408                | 1.135                                     | 0.386       |

| <b>IPI Number</b> | <b>Protein Name</b>                                                          | <b>Peptide number</b> | <b>Forward Set 1</b> | <b>Forward Set 2</b> | <b>Reverse Set 3</b> | <b>Average Ratio (Treated /Untreated)</b> | <b>S.D.</b> |
|-------------------|------------------------------------------------------------------------------|-----------------------|----------------------|----------------------|----------------------|-------------------------------------------|-------------|
| IPI00170605.1     | Stereocilin precursor                                                        | 2                     | 1.176                |                      | 1.096                | 1.136                                     | 0.057       |
| IPI00465248.4     | Alpha-enolase                                                                | 6                     | 1.053                | 0.910                | 1.449                | 1.137                                     | 0.279       |
| IPI00025252.1     | Protein disulfide-isomerase A3 precursor                                     | 2                     | 0.870                | 0.980                | 1.563                | 1.137                                     | 0.372       |
| IPI00419194.2     | Hypothetical protein LOC285148                                               | 3                     |                      | 1.112                | 1.163                | 1.137                                     | 0.036       |
| IPI00016339.4     | Ras-related protein Rab-5C                                                   | 3                     | 1.042                | 1.121                | 1.250                | 1.138                                     | 0.105       |
| IPI00016634.1     | Protein C20orf11                                                             | 2                     |                      | 1.102                | 1.176                | 1.139                                     | 0.053       |
| IPI00030363.1     | Acetyl-CoA acetyltransferase, mitochondrial precursor                        | 3                     | 0.980                | 1.250                | 1.190                | 1.140                                     | 0.142       |
| IPI00294627.1     | Splice Isoform 2 of Splicing factor 1                                        | 3                     | 1.053                | 1.330                | 1.038                | 1.140                                     | 0.164       |
| IPI00033143.1     | Eukaryotic translation initiation factor 3 subunit 12                        | 2                     | 1.149                |                      | 1.132                | 1.141                                     | 0.012       |
| IPI00333010.6     | SR-related CTD associated factor 6                                           | 3                     | 1.149                |                      | 1.132                | 1.141                                     | 0.012       |
| IPI00006252.3     | Multisynthetase complex auxiliary component p43                              | 2                     | 0.943                | 0.970                | 1.515                | 1.143                                     | 0.323       |
| IPI00004839.1     | Crk-like protein                                                             | 2                     | 1.212                |                      | 1.075                | 1.144                                     | 0.097       |
| IPI00025273.1     | Splice Isoform Long of Trifunctional purine biosynthetic protein adenosine-3 | 2                     | 1.111                |                      | 1.176                | 1.144                                     | 0.046       |
| IPI00060627.1     | Hypothetical protein LOC115098                                               | 2                     |                      | 1.202                | 1.087                | 1.144                                     | 0.081       |
| IPI00218342.9     | C-1-tetrahydrofolate synthase, cytoplasmic                                   | 4                     | 0.952                | 0.870                | 1.613                | 1.145                                     | 0.407       |
| IPI00219841.6     | DNA ligase 1                                                                 | 2                     | 1.190                |                      | 1.102                | 1.146                                     | 0.063       |
| IPI00302925.3     | T-complex protein 1 subunit theta                                            | 2                     | 0.962                | 0.940                | 1.538                | 1.147                                     | 0.339       |
| IPI00008274.5     | Adenylyl cyclase-associated protein 1                                        | 3                     | 0.962                |                      | 1.333                | 1.147                                     | 0.263       |
| IPI00328748.3     | ARMET protein precursor                                                      | 1                     | 1.105                |                      | 1.190                | 1.148                                     | 0.060       |
| IPI00031801.4     | Splice Isoform 1 of DNA-binding protein A                                    | 5                     | 0.826                |                      | 1.471                | 1.149                                     | 0.455       |



| <b>IPI Number</b> | <b>Protein Name</b>                                                               | <b>Peptide number</b> | <b>Forward Set 1</b> | <b>Forward Set 2</b> | <b>Reverse Set 3</b> | <b>Average Ratio (Treated /Untreated)</b> | <b>S.D.</b> |
|-------------------|-----------------------------------------------------------------------------------|-----------------------|----------------------|----------------------|----------------------|-------------------------------------------|-------------|
| IPI00002894.2     | DNA polymerase delta catalytic subunit                                            | 3                     | 1.266                |                      | 1.032                | 1.149                                     | 0.165       |
| IPI00009747.1     | Lanosterol synthase                                                               | 2                     | 1.205                | 1.104                |                      | 1.154                                     | 0.071       |
| IPI00414320.1     | Annexin A11                                                                       | 2                     | 1.045                |                      | 1.266                | 1.155                                     | 0.156       |
| IPI00026087.1     | Barrier-to-autointegration factor                                                 | 5                     | 1.124                | 1.260                | 1.083                | 1.156                                     | 0.093       |
| IPI00170692.4     | vesicle-associated membrane protein-associated protein A isoform 2                | 3                     | 0.943                |                      | 1.370                | 1.157                                     | 0.302       |
| IPI00329351.5     | P60, 60-kDa heat shock protein, HSP60 (Fragment)                                  | 2                     |                      | 1.140                | 1.176                | 1.158                                     | 0.025       |
| IPI00290192.1     | Ribonuclease HI large subunit                                                     | 3                     | 1.075                | 1.195                | 1.205                | 1.158                                     | 0.072       |
| IPI00301489.3     | Uroporphyrinogen decarboxylase                                                    | 3                     | 1.127                |                      | 1.190                | 1.159                                     | 0.045       |
| IPI00219669.4     | Carbonic anhydrase-related protein                                                | 3                     | 1.282                |                      | 1.038                | 1.160                                     | 0.173       |
| IPI00023640.2     | Programmed cell death protein 5                                                   | 2                     | 0.971                | 1.350                |                      | 1.160                                     | 0.268       |
| IPI00412987.3     | Glia maturation factor beta                                                       | 2                     | 1.111                | 1.210                |                      | 1.161                                     | 0.070       |
| IPI00294911.1     | Succinate dehydrogenase [ubiquinone] iron-sulfur protein, mitochondrial precursor | 2                     | 1.064                | 1.154                | 1.267                | 1.161                                     | 0.102       |
| IPI00013862.7     | Thymidylate kinase                                                                | 2                     | 1.111                |                      | 1.212                | 1.162                                     | 0.071       |
| IPI00076042.2     | Short heat shock protein 60 Hsp60s2                                               | 4                     | 1.124                | 1.250                | 1.113                | 1.162                                     | 0.076       |
| IPI00000783.1     | Splice Isoform 1 of Proteasome subunit beta type 8 precursor                      | 3                     | 1.124                | 1.201                |                      | 1.162                                     | 0.055       |
| IPI00171412.1     | Splice Isoform 1 of Sulfatase-modifying factor 2 precursor                        | 2                     | 1.211                | 1.165                | 1.111                | 1.162                                     | 0.050       |
| IPI00009480.1     | COP9 signalosome complex subunit 8                                                | 2                     | 1.129                | 1.260                | 1.102                | 1.164                                     | 0.085       |
| IPI00017592.1     | Leucine zipper-EF-hand-containing transmembrane protein 1, mitochondrial          | 3                     | 0.926                | 1.116                | 1.449                | 1.164                                     | 0.265       |

| <b>IPI Number</b> | <b>Protein Name</b>                                               | <b>Peptide number</b> | <b>Forward Set 1</b> | <b>Forward Set 2</b> | <b>Reverse Set 3</b> | <b>Average Ratio (Treated /Untreated)</b> | <b>S.D.</b> |
|-------------------|-------------------------------------------------------------------|-----------------------|----------------------|----------------------|----------------------|-------------------------------------------|-------------|
|                   | precursor                                                         |                       |                      |                      |                      |                                           |             |
| IPI00000792.1     | Quinone oxidoreductase                                            | 2                     | 1.220                | 1.108                |                      | 1.164                                     | 0.079       |
| IPI00017763.4     | Nucleosome assembly protein 1-like 4                              | 3                     | 1.020                | 0.980                | 1.493                | 1.164                                     | 0.285       |
| IPI00300074.3     | Phenylalanyl-tRNA synthetase beta chain                           | 3                     | 1.099                | 1.203                | 1.193                | 1.165                                     | 0.057       |
| IPI00106495.1     | Condensin complex subunit 3                                       | 3                     | 1.266                | 1.039                | 1.194                | 1.166                                     | 0.116       |
| IPI00025039.1     | Fibrillarin                                                       | 2                     |                      |                      | 1.167                | 1.167                                     |             |
| IPI00470576.4     | Leucine-rich repeat-containing protein 57                         | 2                     | 1.266                | 1.074                |                      | 1.170                                     | 0.136       |
| IPI00328415.10    | NADH-cytochrome b5 reductase                                      | 3                     | 1.125                |                      | 1.216                | 1.170                                     | 0.064       |
| IPI00024919.3     | Thioredoxin-dependent peroxide reductase, mitochondrial precursor | 4                     | 0.971                | 1.050                | 1.493                | 1.171                                     | 0.281       |
| IPI00018783.1     | Inosine triphosphate pyrophosphatase                              | 2                     | 1.042                |                      | 1.302                | 1.172                                     | 0.184       |
| IPI00003865.1     | Splice Isoform 1 of Heat shock cognate 71 kDa protein             | 8                     | 1.075                | 0.950                | 1.493                | 1.173                                     | 0.284       |
| IPI00031820.2     | Phenylalanyl-tRNA synthetase alpha chain                          | 3                     | 0.917                |                      | 1.429                | 1.173                                     | 0.361       |
| IPI00002520.1     | Serine hydroxymethyltransferase, mitochondrial precursor          | 2                     | 1.020                | 1.150                | 1.351                | 1.174                                     | 0.167       |
| IPI00397611.1     | PREDICTED: similar to ribosomal protein L13 isoform 1             | 4                     | 0.870                | 1.080                | 1.587                | 1.179                                     | 0.369       |
| IPI00299155.5     | Proteasome subunit alpha type 4                                   | 4                     | 0.952                |                      | 1.408                | 1.180                                     | 0.322       |
| IPI00306332.4     | 60S ribosomal protein L24                                         | 2                     | 1.136                | 1.110                | 1.299                | 1.182                                     | 0.102       |
| IPI00016801.1     | Glutamate dehydrogenase 1, mitochondrial precursor                | 3                     | 0.893                |                      | 1.471                | 1.182                                     | 0.409       |
| IPI00006907.1     | Protein C12orf5                                                   | 2                     |                      | 1.085                | 1.282                | 1.184                                     | 0.139       |
| IPI00329600.3     | Probable saccharopine dehydrogenase                               | 4                     | 1.326                |                      | 1.042                | 1.184                                     | 0.201       |

| <b>IPI Number</b> | <b>Protein Name</b>                                                       | <b>Peptide number</b> | <b>Forward Set 1</b> | <b>Forward Set 2</b> | <b>Reverse Set 3</b> | <b>Average Ratio (Treated /Untreated)</b> | <b>S.D.</b> |
|-------------------|---------------------------------------------------------------------------|-----------------------|----------------------|----------------------|----------------------|-------------------------------------------|-------------|
| IPI00219622.2     | Proteasome subunit alpha type 2                                           | 4                     | 1.020                | 1.250                | 1.282                | 1.184                                     | 0.143       |
| IPI00334907.3     | phosphatidylinositol transfer protein, beta                               | 3                     | 1.176                |                      | 1.192                | 1.184                                     | 0.011       |
| IPI00329742.1     | Fumarylacetoacetate hydrolase domain containing 2A                        | 2                     | 1.201                | 1.104                | 1.250                | 1.185                                     | 0.074       |
| IPI00069750.1     | fuse-binding protein-interacting repressor isoform a                      | 2                     | 0.935                | 1.440                |                      | 1.187                                     | 0.357       |
| IPI00021924.1     | Histone H1x                                                               | 2                     |                      | 1.170                | 1.205                | 1.187                                     | 0.025       |
| IPI00334159.6     | Von Hippel-Lindau binding protein 1                                       | 3                     | 0.909                | 0.870                | 1.786                | 1.188                                     | 0.518       |
| IPI00060181.1     | EF-hand domain-containing protein 2                                       | 2                     |                      |                      | 1.190                | 1.190                                     |             |
| IPI00014938.2     | Nuclear protein Hcc-1                                                     | 3                     | 0.917                | 1.590                | 1.064                | 1.191                                     | 0.354       |
| IPI00031812.2     | Nuclease sensitive element-binding protein 1                              | 2                     | 0.741                | 1.270                | 1.563                | 1.191                                     | 0.417       |
| IPI00250297.3     | L-aminoadipate-semialdehyde dehydrogenase-phosphopantetheinyl transferase | 2                     | 1.176                | 1.192                | 1.205                | 1.191                                     | 0.014       |
| IPI00027193.2     | Splice Isoform 2 of Chloride intracellular channel protein 5              | 2                     | 1.235                |                      | 1.149                | 1.192                                     | 0.060       |
| IPI00218733.5     | Superoxide dismutase                                                      | 4                     | 0.980                | 0.810                | 1.786                | 1.192                                     | 0.521       |
| IPI00156374.5     | Splice Isoform 1 of Importin-4                                            | 5                     |                      |                      | 1.193                | 1.193                                     |             |
| IPI00219526.6     | phosphoglucomutase 1                                                      | 5                     | 1.087                |                      | 1.299                | 1.193                                     | 0.150       |
| IPI00012341.1     | Splice Isoform SRP40-1 of Splicing factor, arginine/serine-rich 5         | 2                     |                      | 1.301                | 1.087                | 1.194                                     | 0.151       |
| IPI00479877.4     | 4-trimethylaminobutyraldehyde dehydrogenase                               | 2                     | 1.190                |                      | 1.203                | 1.197                                     | 0.009       |
| IPI00440493.2     | ATP synthase alpha chain, mitochondrial precursor                         | 5                     | 0.820                | 1.020                | 1.754                | 1.198                                     | 0.492       |

| <b>IPI Number</b> | <b>Protein Name</b>                                                                                                                                                                                                                               | <b>Peptide number</b> | <b>Forward Set 1</b> | <b>Forward Set 2</b> | <b>Reverse Set 3</b> | <b>Average Ratio (Treated /Untreated)</b> | <b>S.D.</b> |
|-------------------|---------------------------------------------------------------------------------------------------------------------------------------------------------------------------------------------------------------------------------------------------|-----------------------|----------------------|----------------------|----------------------|-------------------------------------------|-------------|
| IPI00037448.3     | Glyoxylate reductase/hydroxypyruvate reductase                                                                                                                                                                                                    | 2                     | 0.990                |                      | 1.408                | 1.199                                     | 0.296       |
| IPI00306708.3     | T-lymphokine-activated killer cell-originated protein kinase                                                                                                                                                                                      | 2                     | 1.190                |                      | 1.209                | 1.200                                     | 0.013       |
| IPI00220113.1     | Splice Isoform 2 of Microtubule-associated protein 4                                                                                                                                                                                              | 2                     | 1.190                |                      | 1.210                | 1.200                                     | 0.014       |
| IPI00219953.5     | cytidylate kinase                                                                                                                                                                                                                                 | 3                     | 0.735                |                      | 1.667                | 1.201                                     | 0.659       |
| IPI00012079.1     | Eukaryotic translation initiation factor 4B                                                                                                                                                                                                       | 2                     | 1.136                | 1.080                | 1.389                | 1.202                                     | 0.164       |
| IPI00184330.5     | DNA replication licensing factor MCM2                                                                                                                                                                                                             | 2                     | 0.962                | 1.260                | 1.389                | 1.203                                     | 0.219       |
| IPI00025340.3     | Pyridoxal phosphate phosphatase                                                                                                                                                                                                                   | 5                     | 1.221                | 1.185                | 1.205                | 1.204                                     | 0.018       |
| IPI00412259.2     | PREDICTED: similar to ATP-dependent DNA helicase II, 70 kDa subunit (Lupus Ku autoantigen protein p70) (Ku70) (70 kDa subunit of Ku antigen) (Thyroid-lupus autoantigen) (TLAA) (CTC box binding factor 75 kDa subunit) (CTCBF) (CTC75) isoform 1 | 4                     | 0.926                | 0.970                | 1.724                | 1.207                                     | 0.449       |
| IPI00013184.1     | N-terminal acetyltransferase complex ARD1 subunit homolog A                                                                                                                                                                                       | 2                     | 1.124                |                      | 1.299                | 1.211                                     | 0.124       |
| IPI00016077.1     | Protein NipSnap2                                                                                                                                                                                                                                  | 3                     | 0.990                |                      | 1.449                | 1.220                                     | 0.325       |
| IPI00295081.1     | Tubulin gamma-1 chain                                                                                                                                                                                                                             | 2                     | 0.926                |                      | 1.515                | 1.221                                     | 0.417       |
| IPI00026516.1     | Succinyl-CoA:3-ketoacid-coenzyme A transferase 1, mitochondrial precursor                                                                                                                                                                         | 2                     | 1.333                | 1.110                |                      | 1.222                                     | 0.158       |
| IPI00306369.3     | NOL1/NOP2/Sun domain family 2 protein                                                                                                                                                                                                             | 2                     | 1.389                | 1.050                | 1.235                | 1.224                                     | 0.170       |
| IPI00019269.2     | REC14 protein                                                                                                                                                                                                                                     | 4                     | 1.273                |                      | 1.176                | 1.225                                     | 0.068       |

| <b>IPI Number</b> | <b>Protein Name</b>                                                       | <b>Peptide number</b> | <b>Forward Set 1</b> | <b>Forward Set 2</b> | <b>Reverse Set 3</b> | <b>Average Ratio (Treated /Untreated)</b> | <b>S.D.</b> |
|-------------------|---------------------------------------------------------------------------|-----------------------|----------------------|----------------------|----------------------|-------------------------------------------|-------------|
| IPI00008527.3     | 60S acidic ribosomal protein P1                                           | 5                     | 1.031                | 1.440                | 1.205                | 1.225                                     | 0.205       |
| IPI00019178.2     | Phosphoserine phosphatase                                                 | 2                     | 1.333                | 1.125                | 1.220                | 1.226                                     | 0.104       |
| IPI00555956.1     | Proteasome subunit beta type 4 precursor                                  | 2                     | 1.124                |                      | 1.333                | 1.228                                     | 0.148       |
| IPI00300371.3     | Splicing factor 3B subunit 3                                              | 2                     | 1.136                | 1.180                | 1.370                | 1.229                                     | 0.124       |
| IPI00009904.1     | Protein disulfide-isomerase A4 precursor                                  | 2                     | 0.962                | 1.040                | 1.695                | 1.232                                     | 0.403       |
| IPI00449049.4     | Poly [ADP-ribose] polymerase 1                                            | 3                     | 1.136                | 1.330                |                      | 1.233                                     | 0.137       |
| IPI00014177.3     | Septin-2                                                                  | 3                     | 1.282                | 1.185                |                      | 1.234                                     | 0.069       |
| IPI00410693.3     | Splice Isoform 1 of Plasminogen activator inhibitor 1 RNA-binding protein | 4                     | 1.010                | 1.030                | 1.667                | 1.236                                     | 0.373       |
| IPI00221178.1     | Splice Isoform 2 of Tumor protein D54                                     | 2                     | 1.010                |                      | 1.471                | 1.240                                     | 0.326       |
| IPI00017963.1     | Small nuclear ribonucleoprotein Sm D2                                     | 2                     | 1.190                | 1.300                |                      | 1.245                                     | 0.077       |
| IPI00003217.3     | Proteasome subunit beta type 7 precursor                                  | 2                     | 0.980                |                      | 1.515                | 1.248                                     | 0.378       |
| IPI00304875.1     | Splice Isoform 1 of HIRA-interacting protein 3                            | 2                     | 1.299                |                      | 1.201                | 1.250                                     | 0.069       |
| IPI00010347.5     | isocitrate dehydrogenase 3, beta subunit isoform c                        | 2                     | 1.000                |                      | 1.500                | 1.250                                     | 0.354       |
| IPI00398135.2     | PREDICTED: similar to 60S ribosomal protein L27a                          | 3                     | 0.769                | 1.130                | 1.852                | 1.250                                     | 0.551       |
| IPI00216159.13    | Glucosamine--fructose-6-phosphate aminotransferase [isomerizing] 2        | 2                     | 1.149                |                      | 1.351                | 1.250                                     | 0.143       |
| IPI00020984.1     | Calnexin precursor                                                        | 4                     | 1.075                | 1.090                | 1.587                | 1.251                                     | 0.291       |
| IPI00143753.3     | PREDICTED: U2-associated SR140 protein                                    | 2                     | 1.099                |                      | 1.408                | 1.254                                     | 0.219       |
| IPI00011274.1     | heterogeneous nuclear ribonucleoprotein D-like                            | 4                     | 1.250                |                      | 1.263                | 1.257                                     | 0.009       |
| IPI00003965.4     | Ubiquitin carboxyl-terminal hydrolase 7                                   | 2                     | 1.299                |                      | 1.235                | 1.267                                     | 0.045       |
| IPI00000811.2     | Proteasome subunit beta type 6 precursor                                  | 2                     | 1.111                |                      | 1.429                | 1.270                                     | 0.224       |

| <b>IPI Number</b> | <b>Protein Name</b>                                                                  | <b>Peptide number</b> | <b>Forward Set 1</b> | <b>Forward Set 2</b> | <b>Reverse Set 3</b> | <b>Average Ratio (Treated /Untreated)</b> | <b>S.D.</b> |
|-------------------|--------------------------------------------------------------------------------------|-----------------------|----------------------|----------------------|----------------------|-------------------------------------------|-------------|
| IPI00003870.1     | Putative ATP-dependent Clp protease proteolytic subunit, mitochondrial precursor     | 3                     |                      | 1.225                | 1.316                | 1.270                                     | 0.064       |
| IPI00220014.2     | isopentenyl-diphosphate delta isomerase                                              | 2                     | 1.429                |                      | 1.124                | 1.276                                     | 0.216       |
| IPI00017964.1     | Small nuclear ribonucleoprotein Sm D3                                                | 3                     | 1.042                | 1.180                | 1.613                | 1.278                                     | 0.298       |
| IPI00029764.1     | Splicing factor 3A subunit 3                                                         | 4                     | 1.042                | 1.220                | 1.587                | 1.283                                     | 0.278       |
| IPI00008530.1     | 60S acidic ribosomal protein P0                                                      | 4                     | 1.075                | 1.080                | 1.695                | 1.283                                     | 0.356       |
| IPI00020599.1     | Calreticulin precursor                                                               | 3                     | 1.000                | 1.100                | 1.754                | 1.285                                     | 0.410       |
| IPI00296259.4     | Transmembrane emp24 domain-containing protein 4 precursor                            | 2                     | 1.032                |                      | 1.538                | 1.285                                     | 0.358       |
| IPI00017342.1     | Rho-related GTP-binding protein RhoG precursor                                       | 2                     |                      | 1.293                | 1.282                | 1.288                                     | 0.008       |
| IPI00052885.5     | 18 kDa protein                                                                       | 3                     | 1.389                | 1.190                |                      | 1.289                                     | 0.141       |
| IPI00296053.3     | Fumarate hydratase, mitochondrial precursor                                          | 3                     | 1.042                | 1.050                | 1.786                | 1.292                                     | 0.427       |
| IPI00337385.1     | Splice Isoform 1 of Pre-mRNA-processing factor 40 homolog A                          | 2                     | 0.833                |                      | 1.754                | 1.294                                     | 0.651       |
| IPI00003419.1     | Small acidic protein                                                                 | 2                     | 1.283                | 1.293                | 1.316                | 1.297                                     | 0.017       |
| IPI00014577.1     | Ras-related protein Rab-18                                                           | 2                     | 1.299                |                      |                      | 1.299                                     |             |
| IPI00026215.1     | Flap endonuclease 1                                                                  | 3                     | 1.299                |                      |                      | 1.299                                     |             |
| IPI00260209.4     | PREDICTED: similar to Serine-threonine kinase receptor-associated protein            | 2                     | 1.087                |                      | 1.515                | 1.301                                     | 0.303       |
| IPI00027285.1     | Splice Isoform SM-B' of Small nuclear ribonucleoprotein-associated proteins B and B' | 2                     | 0.990                |                      | 1.613                | 1.302                                     | 0.440       |
| IPI00011937.1     | Peroxiredoxin-4                                                                      | 3                     | 1.099                | 1.020                | 1.786                | 1.302                                     | 0.421       |
| IPI00329801.11    | Annexin A5                                                                           | 2                     | 1.293                | 1.254                | 1.370                | 1.306                                     | 0.059       |

| <b>IPI Number</b> | <b>Protein Name</b>                                                        | <b>Peptide number</b> | <b>Forward Set 1</b> | <b>Forward Set 2</b> | <b>Reverse Set 3</b> | <b>Average Ratio (Treated /Untreated)</b> | <b>S.D.</b> |
|-------------------|----------------------------------------------------------------------------|-----------------------|----------------------|----------------------|----------------------|-------------------------------------------|-------------|
| IPI00009057.1     | Splice Isoform A of Ras-GTPase-activating protein-binding protein 2        | 6                     |                      | 1.400                | 1.213                | 1.306                                     | 0.132       |
| IPI00017160.3     | Protein C6orf55                                                            | 1                     | 1.316                |                      |                      | 1.316                                     |             |
| IPI00004503.5     | LAMP1 protein                                                              | 3                     |                      |                      | 1.316                | 1.316                                     |             |
| IPI00018434.1     | Splice Isoform 1 of Tumor susceptibility gene 101 protein                  | 3                     | 1.316                |                      |                      | 1.316                                     |             |
| IPI00185919.3     | Splice Isoform 1 of La-related protein 1                                   | 3                     |                      |                      | 1.316                | 1.316                                     |             |
| IPI00010157.1     | S-adenosylmethionine synthetase isoform type-2                             | 3                     | 1.087                | 0.900                | 1.961                | 1.316                                     | 0.566       |
| IPI00007765.5     | Stress-70 protein, mitochondrial precursor                                 | 2                     | 1.449                | 1.040                | 1.471                | 1.320                                     | 0.243       |
| IPI00004397.1     | Ras-related protein Ral-B                                                  | 3                     | 1.104                |                      | 1.538                | 1.321                                     | 0.307       |
| IPI00031461.1     | Rab GDP dissociation inhibitor beta                                        | 4                     | 1.136                |                      | 1.515                | 1.326                                     | 0.268       |
| IPI00218474.4     | Beta-enolase                                                               | 1                     | 1.092                |                      | 1.563                | 1.327                                     | 0.333       |
| IPI00029665.8     | Cob(I)yrinic acid a,c-diamide adenosyltransferase, mitochondrial precursor | 2                     |                      | 1.093                | 1.563                | 1.328                                     | 0.332       |
| IPI00011229.1     | Cathepsin D precursor                                                      | 3                     | 1.282                | 1.070                | 1.639                | 1.330                                     | 0.288       |
| IPI00020602.1     | Casein kinase II subunit alpha'                                            | 2                     | 1.471                |                      | 1.190                | 1.331                                     | 0.198       |
| IPI00000015.2     | Splicing factor, arginine/serine-rich 4                                    | 2                     |                      |                      | 1.333                | 1.333                                     |             |
| IPI00003505.3     | Splice Isoform 1 of Thyroid receptor-interacting protein 13                | 2                     | 1.333                |                      |                      | 1.333                                     |             |
| IPI00292140.4     | Caspase-3 precursor                                                        | 2                     |                      |                      | 1.333                | 1.333                                     |             |
| IPI00220271.2     | Alcohol dehydrogenase                                                      | 2                     | 1.394                | 1.350                | 1.266                | 1.337                                     | 0.065       |
| IPI00217477.4     | High mobility group protein B3                                             | 2                     | 1.064                |                      | 1.613                | 1.338                                     | 0.388       |
| IPI00010204.1     | Splicing factor, arginine/serine-rich 3                                    | 4                     | 0.901                | 2.160                | 0.961                | 1.341                                     | 0.710       |

| <b>IPI Number</b> | <b>Protein Name</b>                                           | <b>Peptide number</b> | <b>Forward Set 1</b> | <b>Forward Set 2</b> | <b>Reverse Set 3</b> | <b>Average Ratio (Treated /Untreated)</b> | <b>S.D.</b> |
|-------------------|---------------------------------------------------------------|-----------------------|----------------------|----------------------|----------------------|-------------------------------------------|-------------|
| IPI00017341.2     | Splicing factor 3A subunit 2                                  | 3                     | 1.031                |                      | 1.667                | 1.349                                     | 0.450       |
| IPI00064765.2     | 60S ribosomal protein L10-like                                | 3                     | 1.471                | 1.050                | 1.538                | 1.353                                     | 0.265       |
| IPI00023785.5     | Splice Isoform 1 of Probable ATP-dependent RNA helicase DDX17 | 2                     | 0.962                | 1.240                | 1.887                | 1.363                                     | 0.475       |
| IPI00023860.1     | Nucleosome assembly protein 1-like 1                          | 2                     | 1.124                | 1.150                | 1.818                | 1.364                                     | 0.394       |
| IPI00007188.4     | ADP/ATP translocase 2                                         | 4                     | 1.370                |                      |                      | 1.370                                     |             |
| IPI00012442.1     | Ras-GTPase-activating protein-binding protein 1               | 3                     | 1.250                | 1.570                | 1.293                | 1.371                                     | 0.174       |
| IPI00028055.4     | Transmembrane emp24 domain-containing protein 10 precursor    | 2                     | 1.408                |                      | 1.347                | 1.378                                     |             |
| IPI00334190.4     | Stomatin-like protein 2                                       | 3                     |                      |                      | 1.381                | 1.381                                     |             |
| IPI00013297.1     | 28 kDa heat- and acid-stable phosphoprotein                   | 1                     |                      | 1.205                | 1.563                | 1.384                                     | 0.253       |
| IPI00002412.1     | Palmitoyl-protein thioesterase 1 precursor                    | 3                     |                      |                      | 1.389                | 1.389                                     |             |
| IPI00002355.1     | Calcineurin-binding protein Cabin 1                           | 1                     | 1.389                |                      |                      | 1.389                                     |             |
| IPI00219617.4     | Ribose-phosphate pyrophosphokinase II                         | 2                     | 1.389                |                      |                      | 1.389                                     |             |
| IPI00514212.2     | Mps one binder kinase activator-like 1A                       | 3                     |                      |                      | 1.389                | 1.389                                     |             |
| IPI00029266.1     | Small nuclear ribonucleoprotein E                             | 5                     | 1.042                | 1.310                | 1.818                | 1.390                                     | 0.394       |
| IPI00396321.1     | Leucine-rich repeat-containing protein 59                     | 1                     | 1.818                | 0.970                |                      | 1.394                                     | 0.600       |
| IPI00472102.3     | Heat shock protein 60                                         | 7                     | 1.163                | 1.210                | 1.818                | 1.397                                     | 0.366       |
| IPI00477476.1     | CDNA FLJ16339 fis, clone TESTI2008901                         | 2                     |                      | 1.080                | 1.724                | 1.402                                     | 0.455       |
| IPI00018140.3     | Splice Isoform 1 of Heterogeneous nuclear ribonucleoprotein Q | 3                     | 0.943                | 1.310                | 1.961                | 1.405                                     | 0.515       |
| IPI00002149.1     | GTP-binding protein SAR1b                                     | 2                     | 1.408                |                      |                      | 1.408                                     |             |
| IPI00028618.1     | Methylated-DNA--protein-cysteine                              | 2                     | 1.408                |                      |                      | 1.408                                     |             |



| <b>IPI Number</b> | <b>Protein Name</b>                                                                 | <b>Peptide number</b> | <b>Forward Set 1</b> | <b>Forward Set 2</b> | <b>Reverse Set 3</b> | <b>Average Ratio (Treated /Untreated)</b> | <b>S.D.</b> |
|-------------------|-------------------------------------------------------------------------------------|-----------------------|----------------------|----------------------|----------------------|-------------------------------------------|-------------|
|                   | methyltransferase                                                                   |                       |                      |                      |                      |                                           |             |
| IPI00375511.5     | 26 kDa protein                                                                      | 1                     |                      |                      | 1.408                | 1.408                                     |             |
| IPI00025084.3     | Calpain small subunit 1                                                             | 2                     | 0.870                |                      | 1.961                | 1.415                                     | 0.772       |
| IPI00001568.1     | Vacuolar ATP synthase subunit D                                                     | 2                     |                      |                      | 1.429                | 1.429                                     |             |
| IPI00419903.2     | Hypothetical protein LOC554235                                                      | 2                     | 1.429                |                      |                      | 1.429                                     |             |
| IPI00024413.2     | Splice Isoform SV12 of PITSLRE serine/threonine-protein kinase CDC2L2               | 1                     | 1.429                |                      |                      | 1.429                                     |             |
| IPI00175108.4     | PREDICTED: similar to heterogeneous nuclear ribonucleoprotein K isoform a isoform 2 | 8                     | 0.962                | 1.810                | 1.521                | 1.431                                     | 0.431       |
| IPI00002203.5     | BRCA2 and CDKN1A-interacting protein isoform BCCIPbeta                              | 2                     | 1.322                |                      | 1.563                | 1.442                                     | 0.170       |
| IPI00305289.1     | Kinesin-like protein KIF11                                                          | 7                     | 1.449                |                      |                      | 1.449                                     |             |
| IPI00107122.1     | Splice Isoform 1 of Nucleoporin p58/p45                                             | 1                     |                      |                      | 1.449                | 1.449                                     |             |
| IPI00556607.1     | proteasome beta 4 subunit                                                           | 2                     | 1.124                |                      | 1.787                | 1.455                                     | 0.469       |
| IPI00008524.1     | Splice Isoform 1 of Polyadenylate-binding protein 1                                 | 4                     | 1.235                | 1.280                | 1.852                | 1.455                                     | 0.344       |
| IPI00012074.3     | Heterogeneous nuclear ribonucleoprotein R                                           | 4                     | 1.075                | 2.250                | 1.056                | 1.460                                     | 0.684       |
| IPI00328840.7     | THO complex subunit 4                                                               | 2                     | 0.917                | 1.510                | 1.961                | 1.463                                     | 0.523       |
| IPI00003084.1     | DR1-associated protein 1                                                            | 2                     |                      |                      | 1.471                | 1.471                                     |             |
| IPI00021347.1     | Ubiquitin-conjugating enzyme E2 L3                                                  | 2                     |                      |                      | 1.471                | 1.471                                     |             |
| IPI00027627.1     | MDC-3.13 isoform 2                                                                  | 4                     |                      |                      | 1.471                | 1.471                                     |             |
| IPI00220739.2     | Membrane-associated progesterone receptor component 1                               | 2                     | 1.220                |                      | 1.724                | 1.472                                     | 0.357       |
| IPI00024993.4     | Enoyl-CoA hydratase, mitochondrial precursor                                        | 7                     | 1.333                |                      | 1.613                | 1.473                                     | 0.198       |

| <b>IPI Number</b> | <b>Protein Name</b>                                                 | <b>Peptide number</b> | <b>Forward Set 1</b> | <b>Forward Set 2</b> | <b>Reverse Set 3</b> | <b>Average Ratio (Treated /Untreated)</b> | <b>S.D.</b> |
|-------------------|---------------------------------------------------------------------|-----------------------|----------------------|----------------------|----------------------|-------------------------------------------|-------------|
| IPI00329791.7     | Probable ATP-dependent RNA helicase DDX46                           | 3                     | 1.220                |                      | 1.754                | 1.487                                     | 0.378       |
| IPI00020567.1     | Rho-GTPase-activating protein 1                                     | 2                     |                      |                      | 1.493                | 1.493                                     |             |
| IPI00012202.1     | Methylosome protein 50                                              | 3                     | 1.493                |                      |                      | 1.493                                     |             |
| IPI00215638.5     | ATP-dependent RNA helicase A                                        | 3                     | 1.563                | 1.724                | 1.449                | 1.579                                     | 0.138       |
| IPI00017617.1     | Probable ATP-dependent RNA helicase DDX5                            | 5                     | 1.493                | 1.282                | 2.012                | 1.596                                     | 0.376       |
| IPI00298363.2     | Far upstream element-binding protein 2                              | 2                     | 1.555                | 1.558                | 1.733                | 1.615                                     | 0.102       |
| IPI00011118.2     | Ribonucleoside-diphosphate reductase M2 subunit                     | 3                     |                      | 1.786                | 1.449                | 1.617                                     | 0.238       |
| IPI00024913.1     | Splice Isoform Long of ES1 protein homolog, mitochondrial precursor | 3                     |                      | 1.449                | 1.818                | 1.634                                     | 0.261       |
| IPI00017297.1     | Matrin-3                                                            | 2                     | 1.887                | 1.299                | 1.733                | 1.640                                     | 0.305       |
| IPI00479786.2     | KH-type splicing regulatory protein                                 | 1                     | 1.684                | 1.639                | 2.012                | 1.778                                     | 0.204       |
| IPI00216049.1     | Splice Isoform 1 of Heterogeneous nuclear ribonucleoprotein K       | 2                     | 1.497                | 2.001                | 1.961                | 1.820                                     | 0.280       |
| IPI00028888.1     | Splice Isoform 1 of Heterogeneous nuclear ribonucleoprotein D0      | 5                     | 2.083                | 1.988                | 1.471                | 1.847                                     | 0.330       |
| IPI00220740.1     | Splice Isoform 2 of Nucleophosmin                                   | 5                     | 1.631                | 1.600                | 2.439                | 1.890                                     | 0.476       |
| IPI00163782.2     | Splice Isoform 2 of Far upstream element-binding protein 1          | 5                     | 1.333                | 1.820                | 2.632                | 1.928                                     | 0.656       |
| IPI00418471.5     | Vimentin                                                            | 3                     | 1.852                | 1.212                | 2.857                | 1.974                                     | 0.829       |
| IPI00025054.1     | Splice Isoform Long of Heterogenous nuclear ribonucleoprotein U     | 3                     | 1.988                |                      | 1.961                | 1.974                                     | 0.019       |
| IPI00003377.1     | Splice Isoform 1 of Splicing factor,                                | 3                     | 1.042                | 2.050                | 2.941                | 2.011                                     | 0.950       |

| <b>IPI Number</b> | <b>Protein Name</b>                                             | <b>Peptide number</b> | <b>Forward Set 1</b> | <b>Forward Set 2</b> | <b>Reverse Set 3</b> | <b>Average Ratio (Treated /Untreated)</b> | <b>S.D.</b> |
|-------------------|-----------------------------------------------------------------|-----------------------|----------------------|----------------------|----------------------|-------------------------------------------|-------------|
|                   | arginine/serine-rich 7                                          |                       |                      |                      |                      |                                           |             |
| IPI00013881.5     | heterogeneous nuclear ribonucleoprotein H1                      | 4                     | 0.962                | 2.290                | 3.125                | 2.126                                     | 1.091       |
| IPI00215884.3     | splicing factor, arginine/serine-rich 1                         | 3                     | 1.429                | 2.030                | 2.941                | 2.133                                     | 0.762       |
| IPI00022314.1     | Superoxide dismutase [Mn], mitochondrial precursor              | 2                     | 2.941                | 1.613                | 1.961                | 2.172                                     | 0.689       |
| IPI00176692.7     | PREDICTED: similar to hnRNP A1                                  | 3                     | 3.030                | 1.799                | 1.754                | 2.194                                     | 0.724       |
| IPI00005198.2     | Interleukin enhancer-binding factor 2                           | 2                     | 2.123                |                      | 2.336                | 2.230                                     | 0.151       |
| IPI00221354.1     | Splice Isoform Short of RNA-binding protein FUS                 | 3                     | 2.105                | 1.942                | 2.985                | 2.344                                     | 0.561       |
| IPI00304596.3     | Non-POU domain-containing octamer-binding protein               | 3                     | 2.591                | 2.703                | 1.754                | 2.349                                     | 0.518       |
| IPI00179964.5     | Splice Isoform 1 of Polypyrimidine tract-binding protein 1      | 4                     | 2.024                | 2.041                | 3.125                | 2.397                                     | 0.631       |
| IPI00026272.1     | Histone H2A type 1-B                                            | 4                     | 2.564                | 2.222                | 2.770                | 2.519                                     | 0.277       |
| IPI00106509.2     | Splice Isoform 4 of Heterogeneous nuclear ribonucleoprotein A/B | 3                     |                      | 2.780                | 2.263                | 2.522                                     | 0.365       |
| IPI00027834.3     | hnRNP L, isoform a                                              | 4                     | 2.994                | 2.156                | 2.632                | 2.594                                     | 0.420       |
| IPI00171611.5     | H3 histone family, member M                                     | 2                     | 2.041                | 2.231                | 3.731                | 2.668                                     | 0.926       |
| IPI00430812.4     | Zinc finger protein 9                                           | 2                     | 1.695                | 3.704                |                      | 2.699                                     | 1.420       |
| IPI00301936.3     | ELAV-like protein 1                                             | 2                     | 2.336                | 3.704                | 2.857                | 2.966                                     | 0.690       |
| IPI00081836.2     | Histone H2A type 1-H                                            | 3                     | 3.571                | 3.390                | 2.250                | 3.070                                     | 0.716       |
| IPI00171903.1     | heterogeneous nuclear ribonucleoprotein M isoform a             | 5                     | 2.427                | 4.000                | 2.857                | 3.095                                     | 0.813       |
| IPI00334587.1     | hnRNP A/B, Splice Isoform 4                                     | 2                     | 2.625                | 3.802                | 3.125                | 3.184                                     | 0.591       |

| <b>IPI Number</b> | <b>Protein Name</b>                                                 | <b>Peptide number</b> | <b>Forward Set 1</b> | <b>Forward Set 2</b> | <b>Reverse Set 3</b> | <b>Average Ratio (Treated /Untreated)</b> | <b>S.D.</b> |
|-------------------|---------------------------------------------------------------------|-----------------------|----------------------|----------------------|----------------------|-------------------------------------------|-------------|
| IPI00018278.1     | H2A histone family, member V isoform 1                              | 7                     | 3.704                | 2.810                | 3.226                | 3.247                                     | 0.447       |
| IPI00216592.1     | Splice Isoform C1 of Heterogeneous nuclear ribonucleoproteins C1/C2 | 3                     | 3.597                | 3.704                | 2.849                | 3.383                                     | 0.466       |
| IPI00018534.3     | Histone H2B                                                         | 4                     | 2.944                | 3.587                | 3.632                | 3.387                                     | 0.385       |
| IPI00453473.5     | Histone H4                                                          | 4                     | 2.857                | 2.857                | 4.739                | 3.485                                     | 1.087       |
| IPI00010740.1     | Splice Isoform Long of Splicing factor, proline- and glutamine-rich | 5                     | 3.367                | 4.762                | 3.125                | 3.751                                     | 0.884       |
| IPI00027569.1     | Heterogeneous nuclear ribonucleoprotein C-like 1                    | 4                     | 4.000                | 4.348                | 3.559                | 3.969                                     | 0.395       |
| IPI00215965.1     | heterogeneous nuclear ribonucleoprotein A1 isoform b                | 4                     | 3.846                | 4.444                | 4.149                | 4.147                                     | 0.299       |
| IPI00386854.5     | HNRPA2B1 protein                                                    | 5                     | 3.623                | 5.333                | 4.184                | 4.380                                     | 0.872       |
| IPI00396378.3     | Splice Isoform B1 of Heterogeneous nuclear ribonucleoproteins A2/B1 | 2                     | 4.329                | 4.739                | 4.348                | 4.472                                     | 0.232       |

**Table S2. The detailed quantification results for the significantly changed proteins.**

| <b>IPI Number</b>         | <b>Protein Name</b>                                                                                              | <b>Forward<br/>Set 1</b> | <b>Forward<br/>Set 2</b> | <b>Reverse<br/>Set 3</b> | <b>Average</b> | <b>SD</b> |
|---------------------------|------------------------------------------------------------------------------------------------------------------|--------------------------|--------------------------|--------------------------|----------------|-----------|
| <b>A.Histones and HMG</b> |                                                                                                                  |                          |                          |                          |                |           |
| IPI00171611.5             | H3 histone family, member M<br>K.STELLIR.K<br>R.EIAQDFKTDLR.F                                                    | 2.041                    | 2.231                    | 3.731                    | 2.668          | 0.926     |
| IPI00026272.1             | Histone H2A type 1-B<br>R.HLQLAIRNDEELNK.L<br>R.NDEELNKLLGR.V<br>R.VTIAQGGVLPNIQAVLLPK.K<br>K.TRIIPR.H           | 2.564                    | 2.222                    | 2.770                    | 2.519          | 0.277     |
| IPI00217465.4             | Histone H1.2<br>R.KASGPPVSELITK.A<br>K.ASGPPVSELITK.A<br>K.ERSGVSLAALKK.A<br>K.ALAAAGYDVEK.N<br>K.SLVSKGTLVQTK.G | 2.101                    | 3.101                    | 3.040                    | 2.747          | 0.560     |
| IPI00018534.3             | Histone H2B<br>R.SRKESYSVYVYK.V<br>R.KESYSVYVYK.V<br>K.ESYSVYVYKVLK.Q<br>K.AMGIMNSFVNDIFERIASEASR.L              | 2.944                    | 3.587                    | 3.632                    | 3.387          | 0.385     |

| <b>IPI Number</b> | <b>Protein Name</b>                                                                                                                            | <b>Forward<br/>Set 1</b> | <b>Forward<br/>Set 2</b> | <b>Reverse<br/>Set 3</b> | <b>Average</b> | <b>SD</b> |
|-------------------|------------------------------------------------------------------------------------------------------------------------------------------------|--------------------------|--------------------------|--------------------------|----------------|-----------|
| IPI00453473.5     | Histone H4<br>K.TVTAMDVVYALKR.Q<br>R.ISGLIYEETR.G<br>K.VFLENVIRDAVITYTEHAK.R<br>R.DAVITYTEHAKR.K                                               | 2.857                    | 2.857                    | 4.739                    | 3.485          | 1.087     |
| IPI00419258.3     | High mobility group protein B1<br>K.RPPSAFFLFCSEYRPK.I                                                                                         | 0.483                    | 0.517                    | 0.565                    | 0.522          | 0.041     |
| <b>B.hnRNPs</b>   |                                                                                                                                                |                          |                          |                          |                |           |
| IPI00216049.1     | hnRNP K, Splice Isoform 1<br>R.ILSISADIETIGEILKK.I<br>R.LLIHQSLAGGIIGVK.G                                                                      | 1.497                    | 2.001                    | 1.961                    | 1.820          | 0.280     |
| IPI00028888.1     | hnRNP D0, Splice Isoform 1<br>K.IFVGGLSPDTPEEK.I<br>R.HSEAATAQREEWK.M<br>K.MFIGGLSWDTTKK.D<br>K.FGEVVDCTLKLDPITGR.S<br>R.GFGFVLFKESESVDKVMQK.E | 2.083                    | 1.988                    | 1.471                    | 1.847          | 0.330     |
| IPI00025054.1     | hnRNP U, Splice Isoform Long<br>K.SSGPTSLFAVTVAPPGAR.Q<br>K.EKPYFPIPEEYTFIQNVPLEDR.V<br>R.NFILDQTNVSAAAQR.R                                    | 1.988                    |                          | 1.961                    | 1.974          | 0.019     |

| <b>IPI Number</b> | <b>Protein Name</b>                                                                                                    | <b>Forward Set 1</b> | <b>Forward Set 2</b> | <b>Reverse Set 3</b> | <b>Average</b> | <b>SD</b> |
|-------------------|------------------------------------------------------------------------------------------------------------------------|----------------------|----------------------|----------------------|----------------|-----------|
| IPI00176692.7     | PREDICTED: similar to hnRNP A1<br>R.AVSREDSQRPGAHLTVK.K<br>R.EDSQRPGAHLTVK.K<br>R.GFAFVTFDDHDSVDKIVIQK.Y               | 3.030                | 1.799                | 1.754                | 2.194          | 0.724     |
| IPI00334587.1     | hnRNP A/B, Splice Isoform 4<br>K.IFVGGLNPEATEEK.I<br>K.IFVGGLNPEATEEKIR.E<br>K.IFVGGLNPEATEEKIREYFGFGEIEAIELPMDPK.L    | 2.364                | 2.941                | 2.222                | 2.509          | 0.381     |
| IPI00027834.3     | hnRNP L, isoform a<br>K.TPASPVVHIR.G<br>K.ISRPGDSDDSR.S<br>R.YGPQYGHPPPPPPPEYGPHADSPVLMVYGLDQSK.M<br>R.VFNVFCLYGNVEK.V | 2.994                | 2.156                | 2.632                | 2.594          | 0.420     |
| IPI00171903.1     | hnRNP M, isoform a<br>R.AFITNIPFDVK.W<br>K.QGGGGGGGSVPGIER.M<br>R.GNFGGSFAGSFGGAGGHAPGVAR.K<br>R.INEILSNALK.R          | 2.427                | 4.000                | 2.857                | 3.095          | 0.813     |
| IPI00334587.1     | hnRNP A/B, Splice Isoform 2<br>K.IFVGGLNPEATEEK.I<br>K.IFVGGLNPEATEEKIR.E                                              | 2.625                | 3.802                | 3.125                | 3.184          | 0.591     |

| <b>IPI Number</b> | <b>Protein Name</b>                                                                                                                      | <b>Forward<br/>Set 1</b> | <b>Forward<br/>Set 2</b> | <b>Reverse<br/>Set 3</b> | <b>Average</b> | <b>SD</b> |
|-------------------|------------------------------------------------------------------------------------------------------------------------------------------|--------------------------|--------------------------|--------------------------|----------------|-----------|
| IPI00216592.1     | hnRNP C1/C2, Splice Isoform C1<br>K.GFAFVQYVNER.N<br>R.MIAGQVLDINLAAEPK.V<br>K.LKGDDLQAIKK.E                                             | 3.597                    | 3.704                    | 2.849                    | 3.383          | 0.466     |
| IPI00027569.1     | hnRNP C-like 1<br>R.VFIGNLNTLVVK.K<br>K.KSDVEAIFSK.Y<br>K.SDVEAIFSK.Y<br>K.QKVDSLLENLEK.I                                                | 4.000                    | 4.348                    | 3.559                    | 3.969          | 0.395     |
| IPI00215965.1     | hnRNP A1, isoform b<br>K.SESPKEPEQLR.K<br>R.KLFIGGLSFETTDESLR.S<br>K.LFIGGLSFETTDESLR.S<br>R.SSGPYGGGGQYFAKPR.N                          | 3.846                    | 4.444                    | 4.149                    | 4.147          | 0.299     |
| IPI00386854.5     | hnRNP A2B1 protein<br>K.LFIGGLSFETTEESLR.N<br>R.NYYEQWGK.L<br>K.LTDCVVMRDPASKR.S<br>R.GFGFVTFSSMAEVDAAMAARPHSIDGR.V<br>R.EESGKPGAHVTVK.K | 3.623                    | 5.333                    | 4.184                    | 4.380          | 0.872     |
| IPI00396378.3     | hnRNP A2/B1, Splice Isoform B1                                                                                                           | 4.329                    | 4.739                    | 4.348                    | 4.472          | 0.232     |



| <b>IPI Number</b>                    | <b>Protein Name</b>                      | <b>Forward<br/>Set 1</b> | <b>Forward<br/>Set 2</b> | <b>Reverse<br/>Set 3</b> | <b>Average</b> | <b>SD</b> |
|--------------------------------------|------------------------------------------|--------------------------|--------------------------|--------------------------|----------------|-----------|
|                                      | R.QEMQEVQSSR.S                           |                          |                          |                          |                |           |
|                                      | R.GGNFGFGDSR.G                           |                          |                          |                          |                |           |
|                                      | R.GGGGNFGPGPGSNFR.G                      |                          |                          |                          |                |           |
|                                      | K.SGNFGGSR.N                             |                          |                          |                          |                |           |
|                                      | R.NMGGPYGGGNYGPGGSGGSGGYGGR.S            |                          |                          |                          |                |           |
| <b>C.translation related factors</b> |                                          |                          |                          |                          |                |           |
| IPI00216587.8                        | 40S ribosomal protein S8                 | 0.588                    | 0.680                    | 0.641                    | 0.637          | 0.046     |
|                                      | R.IIDVVYNASNELVR.T                       |                          |                          |                          |                |           |
|                                      | K.LTPEEEEILNK.K                          |                          |                          |                          |                |           |
|                                      | K.ISSLLEEQFQQGK.L                        |                          |                          |                          |                |           |
| IPI00023048.3                        | Elongation factor 1δ                     | 0.474                    | 0.463                    | 0.697                    | 0.545          | 0.132     |
|                                      | K.SLAGSSGPGASSGTSGDHGELVVR.I             |                          |                          |                          |                |           |
|                                      | R.IASLEVENQSLR.G                         |                          |                          |                          |                |           |
|                                      | R.SIQLDGLVWGASK.L                        |                          |                          |                          |                |           |
|                                      | K.LVPVGYGIR.K                            |                          |                          |                          |                |           |
| IPI00005154.1                        | Structure-specific recognition protein 1 | 0.518                    | 0.588                    | 0.578                    | 0.561          | 0.038     |
|                                      | K.ADVIQATGDAICIFR.E                      |                          |                          |                          |                |           |
|                                      | K.ASSGLLYPLER.G                          |                          |                          |                          |                |           |
|                                      | R.GFIYVHKPPVHIR.F                        |                          |                          |                          |                |           |
|                                      | K.TFDYKIPYTTVLR.L                        |                          |                          |                          |                |           |
|                                      | R.FDEISFVNFR.G                           |                          |                          |                          |                |           |

C.Enzymes

| <b>IPI Number</b> | <b>Protein Name</b>                                                                                                                     | <b>Forward<br/>Set 1</b> | <b>Forward<br/>Set 2</b> | <b>Reverse<br/>Set 3</b> | <b>Average</b> | <b>SD</b> |
|-------------------|-----------------------------------------------------------------------------------------------------------------------------------------|--------------------------|--------------------------|--------------------------|----------------|-----------|
| IPI00008475.1     | Hydroxymethylglutaryl-CoA synthase,<br>cytoplasmic<br>R.IGVFSYGSGLAATLYSLK.V<br>R.TGVAPDVFAENMK.L<br>R.RPTPNDDTLDEGVGLVHSNIATEHIPSPAK.K | 0.404                    | 0.410                    | 0.662                    | 0.492          | 0.147     |
| IPI00103732.1     | Thymidylate synthase<br>R.DAEPRPPHGLQYLGQIQHILR.C<br>R.TGTGTLVFGMQR.Y<br>R.RPLPPAAQER.D<br>R.YSLRDEFPLLTTK.R<br>K.IWDANGSRDFLDSLGFSTR.E | 0.490                    | 0.498                    | 0.574                    | 0.521          | 0.046     |
| IPI00218371.3     | Ribose-phosphate pyrophosphokinase III<br>R.VYAILTHGIFSGPAISR.I<br>R.VTAVIPCFPYAR.Q                                                     | 0.578                    | 0.381                    | 0.662                    | 0.540          | 0.144     |
| IPI00101405.1     | Farnesyl diphosphate synthase<br>R.VLTEDEMGHPEIGDAIAR.L<br>R.LKEVLEYNAIGGKYNR.G<br>K.IGTDIQDNK.C<br>R.ATPEQYQILKENYGQK.E                | 0.585                    | 0.606                    |                          | 0.595          | 0.015     |
| IPI00025874.2     | Dolichyl-diphosphooligosaccharide--protein<br>glycosyltransferase 67 kDa subunit precursor<br>R.ATSFLLALEPELEAR.L                       | 0.508                    |                          | 0.752                    | 0.630          | 0.173     |

| <b>IPI Number</b> | <b>Protein Name</b>                                                                                                                                                                                         | <b>Forward Set 1</b> | <b>Forward Set 2</b> | <b>Reverse Set 3</b> | <b>Average</b> | <b>SD</b> |
|-------------------|-------------------------------------------------------------------------------------------------------------------------------------------------------------------------------------------------------------|----------------------|----------------------|----------------------|----------------|-----------|
|                   | K.VTAEVVLAHLGGGSTR.A                                                                                                                                                                                        |                      |                      |                      |                |           |
| IPI00155168.2     | Protein tyrosine phosphatase, receptor type, C<br>R.LFLAEFQSIPR.V<br>K.ELISMIQVVK.Q                                                                                                                         | 0.532                | 0.685                | 0.694                | 0.637          | 0.091     |
| IPI00020454.1     | Deoxycytidine kinase<br>K.DAEKPVLFFER.S<br>K.ISIEGNIAAGK.S                                                                                                                                                  |                      | 0.704                | 0.624                | 0.664          | 0.057     |
| IPI00014808.1     | Platelet-activating factor acetylhydrolase IB $\gamma$<br>subunit<br>R.VVVLGLLPR.G<br>R.ELFSPLHALNFGIGGDGTQHVLWR.L<br>K.AIVQLVNER.Q<br>R.GQHPNPLREK.N<br>R.AALAGHPR.A<br>R.AHFLDADPGFVHSDGTISHHDMYDYLHLSR.L | 0.699                | 0.662                | 0.654                | 0.672          | 0.024     |
| IPI00305978.4     | Aflatoxin B1 aldehyde reductase member 2<br>K.ALQAAYGASAPSVTSAALR.W<br>R.VASVLGTMEMGR.R                                                                                                                     | 0.578                | 0.685                | 0.752                | 0.672          | 0.088     |
| IPI00029997.1     | 6-phosphogluconolactonase<br>R.VTLTLPVLNAAR.T<br>R.LLTVPFEKHST.L                                                                                                                                            | 0.510                | 0.762                | 0.730                | 0.667          | 0.137     |

| <b>IPI Number</b> | <b>Protein Name</b>                                                                                                                                                                             | <b>Forward<br/>Set 1</b> | <b>Forward<br/>Set 2</b> | <b>Reverse<br/>Set 3</b> | <b>Average</b> | <b>SD</b> |
|-------------------|-------------------------------------------------------------------------------------------------------------------------------------------------------------------------------------------------|--------------------------|--------------------------|--------------------------|----------------|-----------|
|                   | R.FALGLSGGSLVSMLAR.E<br>R.ELPAAVAPAGPASLAR.W<br>R.LVPFDHAESTYGLYR.T<br>K.IVAPISDSPKPPPQR.V<br>R.TVIFVATGEGK.A                                                                                   |                          |                          |                          |                |           |
| IPI00011118.2     | Ribonucleoside-diphosphate reductase M2 subunit<br>K.GLSLVDKENTPPALSGTR.V<br>R.FSQEVQITEAR.C<br>R.EIINAVR.I                                                                                     |                          | 1.786                    | 1.449                    | 1.617          | 0.238     |
| IPI00022314.1     | Superoxide dismutase 2[Mn], mitochondrial<br>precursor<br>K.AIWNVINWENVTER.Y<br>K.GDVTAQIALQPALK.F                                                                                              | 2.941                    | 1.613                    | 1.961                    | 2.172          | 0.689     |
| <b>D.Others</b>   |                                                                                                                                                                                                 |                          |                          |                          |                |           |
| IPI00007423.1     | Acidic leucine-rich nuclear phosphoprotein 32<br>family member B<br>R.IHLELR.N<br>R.ELVLDNCK.S<br>K.DISTLEPLKKLECLK.S<br>K.SLDLFNCEVTNLNDYR.E<br>K.SLDLFNCEVTNLNDYRESVFK.L<br>K.LLPQLTYLDGYDR.E | 0.552                    | 0.505                    | 0.472                    | 0.510          | 0.041     |

| <b>IPI Number</b> | <b>Protein Name</b>                                                                                                 | <b>Forward<br/>Set 1</b> | <b>Forward<br/>Set 2</b> | <b>Reverse<br/>Set 3</b> | <b>Average</b> | <b>SD</b> |
|-------------------|---------------------------------------------------------------------------------------------------------------------|--------------------------|--------------------------|--------------------------|----------------|-----------|
| IPI00003527.4     | Ezrin-radixin-moesin-binding phosphoprotein 50<br>R.LLVVDPETDEQLQK.L<br>R.SVDPDSPAEASGLR.A<br>R.EALAEAALESPRPALVR.S | 0.498                    | 0.624                    | 0.535                    | 0.552          | 0.065     |
| IPI00027430.1     | Leukosialin precursor<br>R.TGALVLSR.G<br>R.QGSLAMEELK.S                                                             | 0.472                    |                          | 0.662                    | 0.567          | 0.135     |
| IPI00002214.1     | Importin $\alpha$ 2 subunit<br>K.LLGASELPIVTPALR.A<br>R.QDQIQVVNHGLVPFLVSVLSK.A                                     | 0.599                    | 0.735                    | 0.461                    | 0.598          | 0.137     |
| IPI00411356.5     | Vacuolar sorting protein 4a<br>R.LHLGSTPHNLTDANIHELAR.K                                                             | 0.621                    | 0.606                    | 0.575                    | 0.601          | 0.024     |
| IPI00004656.1     | $\beta$ 2-microglobulin precursor<br>K.SNFLNCYVSGFHPSDIEVDLLK.N<br>R.VNHVTLSQPK.I                                   | 0.629                    | 0.593                    | 0.637                    | 0.619          | 0.024     |
| IPI00033494.3     | Myosin regulatory light chain<br>R.ELLTTMGDRFTDEEVDELYR.E<br>K.GNFNYIEFTR.I                                         | 0.595                    | 0.635                    | 0.693                    | 0.641          | 0.049     |
| IPI00027493.1     | 4F2 cell-surface antigen heavy chain<br>R.LLTSFLPAQLLR.L                                                            | 0.662                    | 0.654                    | 0.641                    | 0.652          | 0.011     |

| <b>IPI Number</b> | <b>Protein Name</b>                                                                                                                             | <b>Forward<br/>Set 1</b> | <b>Forward<br/>Set 2</b> | <b>Reverse<br/>Set 3</b> | <b>Average</b> | <b>SD</b> |
|-------------------|-------------------------------------------------------------------------------------------------------------------------------------------------|--------------------------|--------------------------|--------------------------|----------------|-----------|
|                   | K.GQSEDPGSLLSLFR.R<br>R.SLLHGDFHAFSAGPGLFSYIR.H<br>K.ADLLLSTQPGREEGSPLELER.L<br>R.IGDLQAFQGHGAGNLAGLK.G                                         |                          |                          |                          |                |           |
| IPI00006932.1     | LUC7-like 2<br>R.NSMPASSFQQQK.L<br>R.AMLDQLMGTSR.D<br>R.AMLDQLMGTSRDGDTR.Q                                                                      | 0.654                    | 0.535                    | 0.775                    | 0.655          | 0.120     |
| IPI00010133.1     | Coronin-1A<br>R.AVFVSEGK.I<br>K.ILTTGFSR.M<br>K.RGLEVNKCEIAR.F<br>R.HVFGQPAK.A                                                                  | 0.608                    | 0.696                    | 0.664                    | 0.656          | 0.044     |
| IPI00301263.2     | CAD protein<br>K.LALGIPLPELR.N<br>K.TLGVDLVALATR.V                                                                                              | 0.629                    |                          | 0.704                    | 0.667          | 0.053     |
| IPI00027341.1     | Macrophage capping protein<br>R.GLKYQEGGVESAFHK.T<br>K.EGNPEEDLTADKANAQAAALYK.V<br>K.VSDATGQMNLTK.V<br>R.EVQGNESDLFMSYFPR.G<br>K.YQEGGVESAFHK.T | 0.587                    | 0.781                    | 0.654                    | 0.674          | 0.099     |

| <b>IPI Number</b> | <b>Protein Name</b>                                                                                                                                      | <b>Forward<br/>Set 1</b> | <b>Forward<br/>Set 2</b> | <b>Reverse<br/>Set 3</b> | <b>Average</b> | <b>SD</b> |
|-------------------|----------------------------------------------------------------------------------------------------------------------------------------------------------|--------------------------|--------------------------|--------------------------|----------------|-----------|
|                   | K.AQVEIVTDGEEPAEMIQVLGPKPALK.E<br>R.QAALQVAEGFISR.M                                                                                                      |                          |                          |                          |                |           |
| IPI00027382.1     | Splice Isoform 2 of Serine/threonine-protein<br>kinase PAK 3<br>K.KNPQAVLDVLK.F<br>R.LLQTSNITKLEQK.K<br>R.STMVGTPYWMapeVVTR.K                            | 0.680                    | 0.651                    | 0.673                    | 0.668          | 0.015     |
| IPI00215638.5     | ATP-dependent RNA helicase A<br>R.YQILPLHSQIPR.E<br>R.LGGIGQFLAK.A<br>K.AIEPPPLDAVIEAEHTLR.E                                                             | 1.563                    | 1.724                    | 1.449                    | 1.579          | 0.138     |
| IPI00017617.1     | Probable ATP-dependent RNA helicase DDX5<br>R.GVEICIA TPGR.L<br>K.LLQLVEDR.G<br>K.TLSYLLPAIVHINHQPFLER.G<br>R.TTYLVLDEADRMLDMGFEPQIR.K<br>K.QVSDLISVLR.E | 1.493                    | 1.282                    | 2.012                    | 1.596          | 0.376     |
| IPI00298363.2     | Far upstream element-binding protein 2<br>R.SVSLTGAPESVQK.A<br>R.IGGGIDVPVPR.H<br>R.HSVGVVIGR.S<br>R.IINDLLQSLR.S                                        | 1.555                    | 1.558                    | 1.733                    | 1.615          | 0.102     |

| <b>IPI Number</b> | <b>Protein Name</b>                                                                                                                                    | <b>Forward Set 1</b> | <b>Forward Set 2</b> | <b>Reverse Set 3</b> | <b>Average</b> | <b>SD</b> |
|-------------------|--------------------------------------------------------------------------------------------------------------------------------------------------------|----------------------|----------------------|----------------------|----------------|-----------|
|                   | K.DAFADAVQR.A                                                                                                                                          |                      |                      |                      |                |           |
| IPI00024913.1     | Splice Isoform Long of ES1 protein homolog,<br>mitochondrialprecursor<br>R.GKITDLANLSAANHDAAIFFGGFGAAK.N<br>R.NVLTESAR.I<br>R.KVLELTGK.-               |                      | 1.449                | 1.818                | 1.634          | 0.261     |
| IPI00017297.1     | Matrin-3<br>R.GDADQASNILASFGLSAR.D<br>R.DLDELSRYPEDKITPENLPQILLQLK.R<br>R.VVHIMDFQR.G<br>R.YQLLQLVEPFGVISNHLILNK.I<br>R.VIHLSNLPHSGYSDSAVLK.L          | 1.887                | 1.299                | 1.733                | 1.640          | 0.305     |
| IPI00479786.2     | KH-type splicing regulatory protein<br>K.IGGDAATTVNNSTPDFGFGGQKR.Q                                                                                     | 1.684                | 1.639                | 2.012                | 1.778          | 0.204     |
| IPI00220740.1     | Nucleophosmin, Splice Isoform 2<br>K.ADKDYHFKVDNDENEHQLSLR.T<br>K.VDNDENEHQLSLR.T<br>K.MSVQPTVSLGGFEITPPVVLR.L<br>K.GGSLPKVEAK.F<br>R.MTDQEAIQDLWQWR.K | 1.631                | 1.600                | 2.439                | 1.890          | 0.476     |
| IPI00418471.5     | Vimentin                                                                                                                                               | 1.852                | 1.212                | 2.857                | 1.974          | 0.829     |



| <b>IPI Number</b> | <b>Protein Name</b>                                                                                                                                          | <b>Forward<br/>Set 1</b> | <b>Forward<br/>Set 2</b> | <b>Reverse<br/>Set 3</b> | <b>Average</b> | <b>SD</b> |
|-------------------|--------------------------------------------------------------------------------------------------------------------------------------------------------------|--------------------------|--------------------------|--------------------------|----------------|-----------|
|                   | K.ILLAELEQLKGQGK.S<br>R.VEVERDNLAEDIMR.L<br>R.ISLPLPNFSSLNLR.E                                                                                               |                          |                          |                          |                |           |
| IPI00005198.2     | Interleukin enhancer-binding factor 2<br>R.VKPAPDETSFSEALLKR.N<br>K.ILITTVPPNLR.K<br>R.KLDPELHLDIK.V<br>K.VLQSALAAIR.H<br>R.WFEENASQSTVK.V<br>R.QPLALNVAYR.R | 2.123                    |                          | 2.336                    | 2.230          | 0.151     |
| IPI00221354.1     | RNA-binding protein FUS, Splice Isoform Short<br>K.AAIDWFDG@EFSGNPIKVSFATR.R<br>K.APKPDGPGGGPGGSHMGGNYGDDR.R<br>K.LKGEATVSFDDPPSAK.A                         | 2.105                    | 1.942                    | 2.985                    | 2.344          | 0.561     |
| IPI00304596.3     | Non-POU domain-containing octamer-binding<br>protein<br>R.NLPQYVSNELLEEAHSVFGQVER.A<br>R.RMEELHNQEVQK.R<br>K.GIVEFSGKPAAR.K                                  | 2.591                    | 2.703                    | 1.754                    | 2.349          | 0.518     |
| IPI00179964.5     | Polypyrimidine tract-binding protein 1, Splice<br>Isoform 1<br>R.KLPIDVTEGEVISLGLPFGK.V                                                                      | 2.024                    | 2.041                    | 3.125                    | 2.397          | 0.631     |

| <b>IPI Number</b> | <b>Protein Name</b>                                                                                                                                                                       | <b>Forward<br/>Set 1</b> | <b>Forward<br/>Set 2</b> | <b>Reverse<br/>Set 3</b> | <b>Average</b> | <b>SD</b> |
|-------------------|-------------------------------------------------------------------------------------------------------------------------------------------------------------------------------------------|--------------------------|--------------------------|--------------------------|----------------|-----------|
|                   | R.IIVENLFYPVTLDVLHQIFSK.F<br>R.IAIPGLAGAGNSVLLVSNLNPER.V<br>K.MALIQMGSVVEEAVQALIDLHNHDLGENHHLR.V                                                                                          |                          |                          |                          |                |           |
| IPI00430812.4     | Zinc finger protein 9<br>R.GFQFVSSSLPDICYR.C<br>R.EQCCYNCGKPGHLAR.D                                                                                                                       | 1.695                    | 3.704                    |                          | 2.699          | 1.420     |
| IPI00301936.3     | ELAV-like protein 1<br>R.VLVDQTTGLSR.G<br>R.FGGPVHHQAQR.F                                                                                                                                 | 2.336                    | 3.704                    | 2.857                    | 2.966          | 0.690     |
| IPI00010740.1     | Splice Isoform Long of Splicing factor, proline-<br>and glutamine-rich<br>R.LFVGNLPADITEDEFKR.L<br>R.NLSPYVSNELLEEAQFGPIER.A<br>R.AVVIVDDRGR.S<br>K.GIVEFASKPAAR.K<br>R.FGQGGAGPVGGQGPR.G | 3.367                    | 4.762                    | 3.125                    | 3.751          | 0.884     |

**Table S3. Quantification results for elongation factors and ribosomal proteins.**

**Eukaryotic translation elongation factor**

| <b>IPI Number</b> | <b>Protein Name</b>                                             | <b>Forward<br/>set 1</b> | <b>Forward<br/>set 2</b> | <b>Reverse<br/>set 3</b> | <b>Average Ratio<br/>(Treated/Untreated)</b> | <b>SD</b> |
|-------------------|-----------------------------------------------------------------|--------------------------|--------------------------|--------------------------|----------------------------------------------|-----------|
| IPI00023048.3     | Elongation factor 1-delta                                       | 0.474                    | 0.463                    | 0.697                    | 0.545                                        | 0.132     |
| IPI00178440.2     | Elongation factor 1-beta                                        | 0.935                    | 0.770                    | 0.811                    | 0.839                                        | 0.086     |
| IPI00027107.5     | Tu translation elongation factor, mitochondrial                 | 0.911                    | 0.850                    | 0.870                    | 0.877                                        | 0.031     |
| IPI00014424.1     | Elongation factor 1-alpha 2                                     | 0.903                    | 0.920                    | 0.866                    | 0.896                                        | 0.028     |
| IPI00333215.1     | Splice Isoform 1 of Transcription elongation factor A protein 1 | 0.854                    |                          | 0.752                    | 0.803                                        | 0.072     |
|                   |                                                                 |                          |                          | <b>Average<br/>ratio</b> | 0.792                                        |           |

## Ribosomal proteins

| <b>IPI Number</b> | <b>Protein Name</b>                                                                               | <b>Forward<br/>Set 1</b> | <b>Forward<br/>Set 2</b> | <b>Reverse<br/>Set 3</b> | <b>Average Ratio<br/>(Treated/Untreated)</b> | <b>SD</b> |
|-------------------|---------------------------------------------------------------------------------------------------|--------------------------|--------------------------|--------------------------|----------------------------------------------|-----------|
| IPI00216587.8     | 40S ribosomal protein S8                                                                          | 0.588                    | 0.680                    | 0.641                    | 0.637                                        | 0.046     |
| IPI00011253.3     | 40S ribosomal protein S3                                                                          | 0.769                    | 0.660                    | 0.811                    | 0.747                                        | 0.078     |
| IPI00221089.4     | 40S ribosomal protein S13                                                                         | 0.735                    | 0.832                    | 0.733                    | 0.767                                        | 0.057     |
| IPI00221092.7     | 40S ribosomal protein S16                                                                         | 0.709                    | 0.850                    |                          | 0.780                                        | 0.100     |
| IPI00017448.1     | 40S ribosomal protein S21                                                                         | 0.813                    |                          | 0.798                    | 0.806                                        | 0.011     |
| IPI00035167.7     | PREDICTED: similar to ribosomal protein L10a                                                      | 0.855                    | 0.832                    | 0.754                    | 0.814                                        | 0.053     |
| IPI00550021.3     | 60S ribosomal protein L3                                                                          | 0.833                    | 0.875                    | 0.886                    | 0.865                                        | 0.028     |
| IPI00025091.1     | 40S ribosomal protein S11                                                                         | 0.826                    | 0.920                    |                          | 0.873                                        | 0.066     |
| IPI00373924.1     | PREDICTED: similar to 40S ribosomal protein S3a isoform 1                                         | 0.843                    | 0.865                    | 0.916                    | 0.875                                        | 0.037     |
| IPI00465361.3     | 60S ribosomal protein L13                                                                         | 0.862                    | 0.910                    | 0.873                    | 0.882                                        | 0.025     |
| IPI00215790.5     | 60S ribosomal protein L38                                                                         | 0.962                    |                          | 0.812                    | 0.887                                        | 0.106     |
| IPI00219156.6     | 60S ribosomal protein L30                                                                         | 1.050                    | 0.783                    | 0.832                    | 0.888                                        | 0.142     |
| IPI00176696.1     | PREDICTED: similar to 40S ribosomal protein S26                                                   | 0.962                    |                          | 0.821                    | 0.891                                        | 0.099     |
| IPI00412579.5     | 60S ribosomal protein L10a                                                                        | 0.870                    |                          | 0.934                    | 0.902                                        | 0.046     |
| IPI00216237.4     | 60S ribosomal protein L36                                                                         | 0.821                    | 1.080                    | 0.812                    | 0.904                                        | 0.152     |
| IPI00056494.4     | 60S ribosomal protein L36a-like                                                                   | 0.980                    | 0.800                    | 0.987                    | 0.922                                        | 0.106     |
| IPI00025419.5     | PREDICTED: similar to 40S ribosomal protein S3a (V-fos transformation effector protein) isoform 3 | 0.862                    | 0.790                    | 1.124                    | 0.925                                        | 0.176     |
|                   |                                                                                                   |                          |                          | <b>Average<br/>ratio</b> | 0.845                                        |           |

**Table S4. Pathway analysis results obtained by Ingenuity Pathway Analysis using the quantitative proteomics data.**

| <b>Pathways</b>                           | <b>Protein name</b>                                                                      |
|-------------------------------------------|------------------------------------------------------------------------------------------|
| Pyrimidine Metabolism                     | Thymidylate synthase, deoxycytidine kinase, carbamoyl phosphate synthetase II            |
| B Cell Development                        | PTPRC, leukosialin precursor                                                             |
| Regulation of Actin-based Motility by Rho | Splice Isoform 2 of Serine/threonine-protein kinase PAK 3, myosin regulatory light chain |
| Cholesterol Biosynthesis                  | hydroxymethylglutaryl-CoA synthase, farnesyl diphosphate synthase                        |
| Acute Phase Response Signaling            | superoxide dismutase 2, mitochondrial                                                    |
